# Supplementary material for: The use of Br/Cl to promote regioselective gold-catalyzed rearrangement of propargylic carboxylates: an efficient synthesis of (1Z, 3E)-1-bromo/chloro-2-carboxy-1,3-dienes
Source: Royal Society of Chemistry journal article supplement (doi:10.1039/c0cc03669b), 2010-01-01

Supporting Information

**The Use of Halogen to Promote Regioselective Gold-Catalyzed Rearrangement of  
Propargylic Carboxylates: Efficient Synthesis of (1Z, 3E)-1-Halo-2-Carboxy-1,3  
Dienes from Terminally Halogenated Propargyl Carboxylates**

Yanzhao Wang, Biao Lu and Liming Zhang

Department of Chemistry and Biochemistry,  
University of California, Santa Barbara, California, 93106

| <b>Content</b>                                      | <b>Page number</b> |
|-----------------------------------------------------|--------------------|
| <b>General</b>                                      | S-2                |
| <b>General Procedure A</b>                          | S-2                |
| <b>General Procedure for Gold Catalysis</b>         | S-8                |
| <b><sup>1</sup>H and <sup>13</sup>C NMR spectra</b> | S-17               |

**General.** Ethyl acetate (ACS grade), hexanes (ACS grade) and diethyl ether (ACS grade) were purchased from Fisher Scientific and used without further purification. Anhydrous 1, 2-dichloroethane (HPLC grade) was purified by distillation over calcium hydride. Anhydrous tetrahydrofuran in Pure-Pac™ from Aldrich was used directly without further purification. Commercially available reagents were used without further purification. Reactions were monitored by thin layer chromatography (TLC) using silicycle pre-coated silica gel plates. Flash column chromatography was performed over silicycle silica gel (230-400 mesh).  $^1\text{H}$  NMR and  $^{13}\text{C}$  NMR spectra were recorded on a Varian 500 MHz Unity plus spectrometer and a Varian 400 MHz spectrometer using residue solvent peaks as internal standards. Residue solvent peaks as internal standards ( $\text{CHCl}_3$ ,  $^1\text{H}$ : 7.26 ppm;  $^{13}\text{C}$ : 77.2 ppm). Infrared spectra were recorded with a Perkin Elmer FT-IR spectrum 2000 spectrometer and are reported in reciprocal centimeter ( $\text{cm}^{-1}$ ). Mass spectra were recorded with Micromass QTOF2 Quadrupole/Time-of-Flight Tandem mass spectrometer using electron spray ionization.

**General procedure A: preparation of bromopropargyl alcohols and acetates**

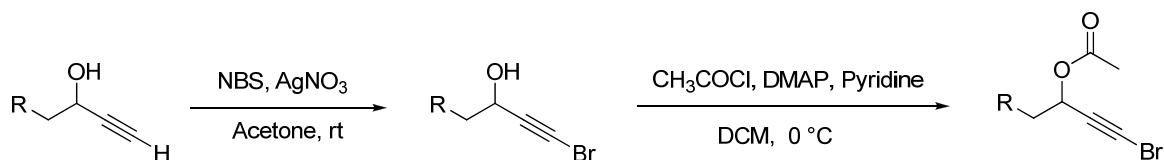

A solution of a propargyl alcohol (10 mmol) and  $\text{AgNO}_3$  (2 mmol) in acetone (1.0 M) was stirred at rt for 25 min, which was followed by the addition of NBS (11 mmol). The reaction mixture was stirred at rt until no starting material was left as indicated by TLC. The reaction mixture was filtered through a small pad of celite. The filtrate was concentrated under *vacuum* and the crude bromopropargyl alcohol was purified by silica gel flash column chromatography.

To a solution of the above bromopropargyl alcohol (2.0 mmol), pyridine (20.0 mmol) and DMAP (0.2 mmol) in anhydrous  $\text{CH}_2\text{Cl}_2$  (6 mL) at 0 °C was slowly added acetyl chloride (0.29 mL, 4 mmol). The reaction was stirred at the same temperature for 30 min before being diluted with hexanes (30 mL). The solid precipitates were filtered off and the filtrate obtained was concentrated. The residue was purified by flash column chromatography to give desired bromopropargyl acetates.

### 1-Bromohex-1-yn-3-yl acetate

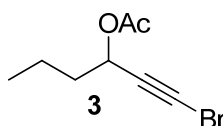

Compound **3** was prepared in 81 % yield according to the general procedure **A** (eluent: ethyl acetate: hexanes = 1: 70).  $^1\text{H}$  NMR (500 MHz,  $\text{CDCl}_3$ )  $\delta$  5.35 (t, 1H,  $J$  = 6.5 Hz), 2.08 (s, 3H), 1.76 – 1.72 (m, 2H), 1.49 – 1.42 (m, 2H), 0.94 (t, 3H,  $J$  = 7.5 Hz);  $^{13}\text{C}$  NMR (125 MHz,  $\text{CDCl}_3$ )  $\delta$  170.1, 77.9, 64.7, 45.9, 36.8, 21.1, 18.5, 13.8; IR (neat): 2962, 2875, 2220, 1747, 1651, 1373, 1230, 1020; MS ( $\text{ES}^+$ ) Calculated for  $[\text{C}_8\text{H}_{12}\text{BrO}_2]^+$ : 219.0; Found: 219.0.

### 4-Bromo-1-phenylbut-3-yn-2-yl acetate

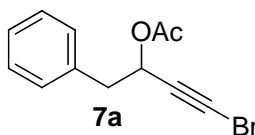

Compound **7a** was prepared in 76 % yield according to the general procedure **A** (eluent: ethyl acetate: hexanes = 1: 100).  $^1\text{H}$  NMR (500 MHz,  $\text{CDCl}_3$ )  $\delta$  7.29 – 7.32 (m, 2H), 7.22 – 7.27 (m, 3H), 5.52 (t, 1H,  $J$  = 6.8 Hz), 3.06 (d, 2H,  $J$  = 6.8 Hz), 2.04 (s, 3H);  $^{13}\text{C}$  NMR (125 MHz,  $\text{CDCl}_3$ )  $\delta$  169.9, 135.7, 129.8, 128.6, 127.3, 77.3, 65.3, 47.1, 41.2, 21.1;

IR (neat): 3448, 2933, 2220, 1747, 1373, 1228, 1022; MS ( $\text{ES}^+$ ) Calculated for  $[\text{C}_{12}\text{H}_{11}\text{BrNaO}_2]^+$ : 289.0; Found: 289.0.

### 1-Bromo-5-phenylpent-1-yn-3-yl acetate

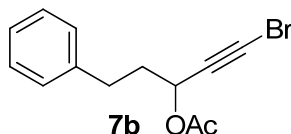

Compound **7b** was prepared in 86 % yield according to the general procedure **A** (eluent: ethyl acetate: hexanes = 1: 100).  $^1\text{H}$  NMR (500 MHz,  $\text{CDCl}_3$ )  $\delta$  7.32 – 7.29 (m, 2H), 7.19 – 7.23 (m, 3H), 5.36 (t, 1H,  $J = 6.5$  Hz), 2.78 (t, 1H,  $J = 7.5$  Hz), 2.09 – 2.14 (m, 2H), 2.08 (s, 3H);  $^{13}\text{C}$  NMR (125 MHz,  $\text{CDCl}_3$ )  $\delta$  170.0, 140.7, 128.7, 128.6, 126.4, 77.6, 64.3, 46.6, 36.3, 31.4, 21.1; IR (neat): 3428, 2217, 1739, 1643, 1371, 1228, 1022, 700; MS ( $\text{ES}^+$ ) Calculated for  $[\text{C}_{13}\text{H}_{13}\text{BrNaO}_2]^+$ : 303.0; Found: 303.0.

### 1, 7-Dibromohept-1-yn-3-yl acetate

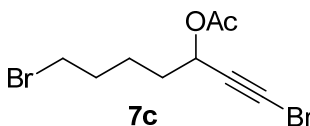

Compound **7c** was prepared in 89 % yield according to the general procedure **A** (eluent: ethyl acetate: hexanes = 1: 50).  $^1\text{H}$  NMR (500 MHz,  $\text{CDCl}_3$ )  $\delta$  5.36 (t, 1H,  $J = 6.0$  Hz), 3.41 (t, 2H,  $J = 7.0$  Hz), 2.09 (s, 3H), 1.88 – 1.91 (m, 2H), 1.77 – 1.82 (m, 2H), 1.58 – 1.62 (m, 2H);  $^{13}\text{C}$  NMR (125 MHz,  $\text{CDCl}_3$ )  $\delta$  170.0, 64.5, 46.5, 33.9, 33.3, 32.3, 23.8, 21.1; IR (neat): 2218, 1747, 1643, 1371, 1228, 1020; MS ( $\text{ES}^+$ ) Calculated for  $[\text{C}_9\text{H}_{12}\text{Br}_2\text{NaO}_2]^+$ : 332.9; Found: 332.9.

### 1-Bromo-8-(tert-butyldimethylsilyloxy)oct-1-yn-3-yl acetate



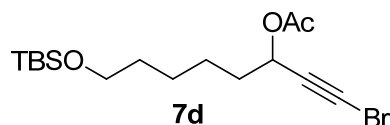

Compound **7d** was prepared in 80 % yield according to the general procedure **A** (eluent: ethyl acetate: hexanes = 1: 100).  $^1\text{H}$  NMR (500 MHz,  $\text{CDCl}_3$ )  $\delta$  5.34 (t, 1H,  $J$  = 6.8 Hz), 3.60 (t, 2H,  $J$  = 6.5 Hz), 2.07 (s, 3H), 1.73 – 1.78 (m, 2H), 1.49 – 1.55 (m, 2H), 1.39 – 1.43 (m, 2H), 1.34 – 1.37 (m, 2H), 0.89 (s, 9H), 0.04 (s, 6H);  $^{13}\text{C}$  NMR (125 MHz,  $\text{CDCl}_3$ )  $\delta$  170.1, 77.8, 64.8, 63.1, 45.9, 34.8, 32.7, 26.1, 25.5, 24.9, 21.1, 18.5, -5.1; IR (neat): 2931, 2858, 2218, 1747, 1651, 1373, 1230, 1097, 835; MS ( $\text{ES}^+$ ) Calculated for  $[\text{C}_{16}\text{H}_{29}\text{BrNaO}_3\text{Si}]^+$ : 399.1; Found: 399.1.

### 1-Bromo-8-*N*-phth-oct-1-yn-3-yl acetate

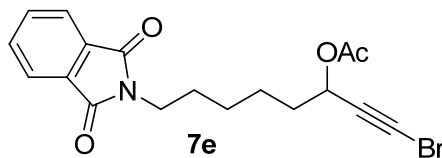

Compound **7e** was prepared in a 72 % yield according the following procedure: To a stirred solution of **7d** (5 mmol) in THF (30mL) is added TBAF (6 mmol, 1M in THF) at rt and leave the reaction overnight. The reaction was concentrated under *vacuum* and the residue was purified through silica gel flash column chromatography (hexane/ethyl acetate = 10:1). To a solution of the alcohol above (1.33 mmol), phthalimide (1.463 mmol),  $\text{PPh}_3$  (1.463 mmol) in anhydrous THF (0.3M) were added DEAD (1.463 mmol) dropwise at 0 °C. The resulting mixture was stirred at rt for 2h. After all starting material was consumed, the mixture was concentrated under *vacuum* and the residue was purified through silica gel flash column chromatography (eluent: ethyl acetate: hexanes = 1:15).  $^1\text{H}$  NMR (500 MHz,  $\text{CDCl}_3$ )  $\delta$  7.83 – 7.85 (m, 2H), 7.70 – 7.72 (m, 2H), 5.33 (t, 1H,  $J$  = 7.0 Hz), 3.68(t, 2H,  $J$  = 7.0 Hz), 2.07 (s, 3H), 1.74 – 1.77 (m, 2H), 1.68 – 1.72(m, 2H), 1.46 – 1.49 (m, 2H), 1.36 – 1.40 (m, 2H) ;  $^{13}\text{C}$  NMR (125 MHz,  $\text{CDCl}_3$ )  $\delta$  170.1, 168.6,

134.1, 132.3, 123.4, 77.7, 64.7, 64.6, 46.1, 38.0, 34.6, 28.6, 26.6, 21.1; IR (neat): 3461, 2939, 2218, 1747, 1709, 1396, 1373, 1230, 721; MS ( $\text{ES}^+$ ) Calculated for  $[\text{C}_{18}\text{H}_{18}\text{BrNNaO}_4]^+$ : 414.0; Found: 414.0.

**8-(Benzyloxy)-1-bromooct-1-yn-3-yl acetate**

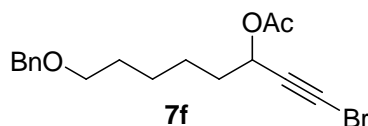

Compound **7f** was prepared in 91 % yield according to the general procedure **A** (eluents: ethyl acetate: hexanes = 1: 100).  $^1\text{H}$  NMR (400 MHz,  $\text{CDCl}_3$ )  $\delta$  7.32 – 7.35 (m, 4H), 7.27 – 7.29 (m, 1H), 5.34 (t, 1H,  $J$  = 6.4 Hz), 4.50 (s, 2H), 3.47 (t, 2H,  $J$  = 6.4 Hz), 2.08 (s, 3H), 1.74 – 1.79 (m, 2H), 1.62 – 1.65 (m, 2H), 1.40 – 1.46 (m, 2H);  $^{13}\text{C}$  NMR (125 MHz,  $\text{CDCl}_3$ )  $\delta$  170.1, 138.8, 128.6, 127.8, 127.7, 77.8, 73.1, 70.4, 64.8, 46.0, 34.8, 29.8, 26.0, 25.0, 21.2.; IR (neat): 2860, 2935, 2860, 2216, 1747, 1371, 1230, 1101, 1022; MS ( $\text{ES}^+$ ) Calculated for  $[\text{C}_{17}\text{H}_{21}\text{BrNaO}_3]^+$ : 375.1; Found: 375.1.

**(E)-Ethyl 8-acetoxy-10-bromodec-2-en-9-ynoate**

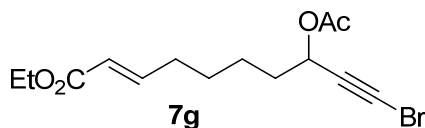

Compound **7g** was prepared in overall 72 % yield via routine deprotection, oxidation and subsequent HWE reaction. The residue was purified through silica gel flash column chromatography (eluents: ethyl acetate: hexanes = 1: 10).  $^1\text{H}$  NMR (500 MHz,  $\text{CDCl}_3$ )  $\delta$  6.94 (dt, 1H,  $J$  = 15.5, 7.0 Hz), 5.81 (dt, 1H,  $J$  = 15.5, 1.5 Hz), 5.34 (t, 1H,  $J$  = 6.5 Hz), 4.18 (q, 2H,  $J$  = 7.0 Hz), 2.19 – 2.24 (m, 2H), 2.07 (s, 3H), 1.74 – 1.79 (m, 2H), 1.44 – 1.51 (m, 4H), 1.28 (t, 3H,  $J$  = 7.0 Hz);  $^{13}\text{C}$  NMR (125 MHz,  $\text{CDCl}_3$ )  $\delta$  170.1, 166.9, 148.8, 121.9, 77.7, 64.6, 60.4, 46.3, 34.5, 32.1, 27.7, 24.6, 21.1, 14.5; IR (neat): 2938, 2218, 1747, 1718, 1651, 1371, 1230, 1022; MS ( $\text{ES}^+$ ) Calculated for  $[\text{C}_{14}\text{H}_{19}\text{BrNaO}_4]^+$ : 353.0; Found: 353.0.

### 1-Bromohex-1-yn-3-yl pivalate

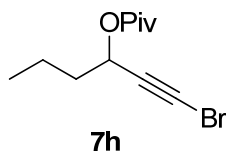

Compound **7h** was prepared in 81 % yield according to the general procedure **A** using pivaloyl chloride instead as the acylating reagent (eluents: ethyl acetate: hexanes = 1: 50).  $^1\text{H}$  NMR (400 MHz,  $\text{CDCl}_3$ )  $\delta$  5.33 (t, 1H,  $J$  = 6.8 Hz), 1.71 – 1.77 (m, 2H), 1.40 – 1.49 (m, 2H), 1.20 (s, 9H), 0.94 (t, 3H,  $J$  = 7.2 Hz);  $^{13}\text{C}$  NMR (125 MHz,  $\text{CDCl}_3$ )  $\delta$  177.4, 78.1, 64.4, 45.4, 39.0, 36.9, 27.3, 18.5, 13.9; IR (neat): 3445, 2956, 2874, 2213, 1729, 1642, 1276, 1143; MS ( $\text{ES}^+$ ) Calculated for  $[\text{C}_{11}\text{H}_{17}\text{BrNaO}_2]^+$ : 283.03; Found: 283.06.

### 1-Bromo-5-methylhex-1-yn-3-yl pivalate

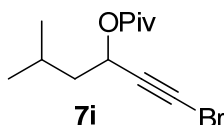

Compound **7i** was prepared in 77 % yield according to the general procedure **A** using pivaloyl chloride instead as the acylating reagent (eluents: ethyl acetate: hexanes = 1: 50).  $^1\text{H}$  NMR (400 MHz,  $\text{CDCl}_3$ )  $\delta$  5.38 (t, 1H,  $J$  = 7.2 Hz), 1.61 – 1.79 (m, 3H), 1.21 (s, 9H), 0.94 (d, 3H,  $J$  = 5.2 Hz), 0.93(d, 3H,  $J$  = 5.2 Hz);  $^{13}\text{C}$  NMR (125 MHz,  $\text{CDCl}_3$ )  $\delta$  177.6, 78.2, 63.4, 45.4, 43.5, 38.9, 27.2, 24.9, 22.7, 22.5; IR (neat): 2960, 2220, 1738, 1458, 1281, 1153, 1138, 1034; MS ( $\text{ES}^+$ ) Calculated for  $[\text{C}_{12}\text{H}_{19}\text{BrNaO}_2]^+$ : 297.1; Found: 297.1.

### 1-Chlorohex-1-yn-3-yl 4-methoxybenzoate

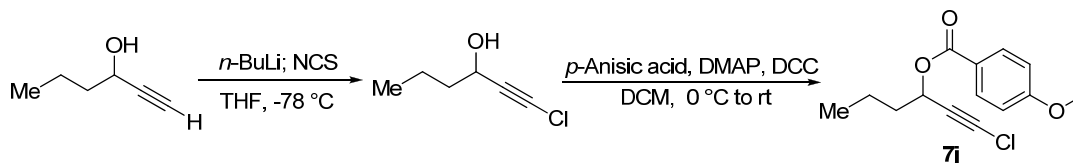

To a solution of hex-1-yn-3-ol in THF (0.2 M) was added *n*-BuLi (1.6 M in hexane) (2.2 equiv) at  $-78\text{ }^\circ\text{C}$ ; after stirring for 10 min, NCS (2.2 equiv) was added into the mixture. The reaction mixture was stirred at  $-78\text{ }^\circ\text{C}$  for 1 h, and the dry ice/acetone bath was

removed to allow the reaction to warm to room temperature. The resulting mixture was then diluted with H<sub>2</sub>O (20 mL) and extracted with CH<sub>2</sub>Cl<sub>2</sub> (150 mL). The organic layer was dried (MgSO<sub>4</sub>). The solvent was removed under reduced pressure. The residue was purified by flash column chromatography on silica gel to give 1-chlorohex-1-yn-3-ol as the desired product.

To a stirred solution of anisic acid (10 mmol) in 10 mL anhydrous CH<sub>2</sub>Cl<sub>2</sub> was added DMAP (1 mmol) and 1-chlorohex-1-yn-3-ol (10 mmol). DCC (11 mmol) was added to the reaction mixture at 0 °C, and the resulting mixture was stirred overnight at room temperature. The precipitated urea was then filtered off and the filtrate evaporated in *vacuum*. The residue was purified by flash column chromatography on silica gel to yield product **7j** in 64% yield (eluent: ethyl acetate: hexane = 1: 100). <sup>1</sup>H NMR (500 MHz, CDCl<sub>3</sub>) δ 8.01 (d, 2H, *J* = 8.5 Hz), 6.92 (d, 2H, *J* = 8.5 Hz), 5.56 (t, 1H, *J* = 6.5 Hz), 3.86 (s, 3H), 1.86 – 1.91 (m, 2H), 1.49 – 1.52 (m, 2H), 1.33 – 1.35 (m, 4H), 0.90 (t, 3H, *J* = 7.0 Hz); <sup>13</sup>C NMR (125 MHz, CDCl<sub>3</sub>) δ 165.4, 163.8, 132.1, 122.4, 113.9, 67.5, 64.6, 64.2, 55.7, 35.0, 31.5, 24.9, 22.7, 14.2; IR (neat): 2956, 2931, 2243, 1718, 1606, 1510, 1257, 1169, 1095, 1031, 769; MS (ES<sup>+</sup>) Calculated for [C<sub>16</sub>H<sub>19</sub>ClNaO<sub>3</sub>]<sup>+</sup>: 317.1; Found: 317.1.

**General procedure for gold catalysis:** A halopropargyl acetate or pivalate (0.30 mmol) was dissolved in anhydrous DCM (1.5 mL) at room temperature and then PPh<sub>3</sub>AuNTf<sub>2</sub> (5 mol %) was added. The reaction mixture was stirred at room temperature and the progress of the reaction was monitored by TLC. The reactions typically took 10 min but for **7j** 3 h was necessary. Upon completion, the reaction was quenched by Et<sub>3</sub>N and then the mixture was concentrated under *vacuum*. The residue was purified through silica gel flash column chromatography to afford the desired product.

**(1Z, 3E)-1-Bromohexa-1, 3-dien-2-yl acetate**

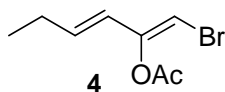

Compound **4** was prepared in 85 % yield according to the general procedure (eluents: ethyl acetate: hexanes = 1: 100).  $^1\text{H}$  NMR (500 MHz,  $\text{CDCl}_3$ )  $\delta$  6.04 (s, 1H), 5.98 (d, 1H,  $J = 15.0$  Hz), 5.86 (dt, 1H,  $J = 15.0, 6.0$  Hz), 2.29 (s, 3H), 2.07 – 2.14 (m, 2H), 1.02 (t, 3H,  $J = 7.5$  Hz);  $^{13}\text{C}$  NMR (125 MHz,  $\text{CDCl}_3$ )  $\delta$  167.2, 150.0, 135.0, 121.4, 97.7, 25.5, 20.7, 13.0; IR (neat): 2972, 2937, 1770, 1699, 1373, 1196; MS ( $\text{ES}^+$ ) Calculated for  $[\text{C}_8\text{H}_{11}\text{BrNaO}_2]^+$ : 241.0; Found: 241.0.

**(1Z, 3E)-1-Bromo-4-phenylbuta-1, 3-dien-2-yl acetate**

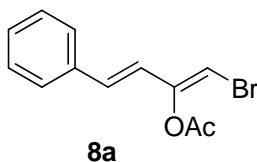

Compound **8a** was prepared in 85 % yield according to the general procedure (eluents: ethyl acetate: hexanes = 1: 40).  $^1\text{H}$  NMR (500 MHz,  $\text{CDCl}_3$ )  $\delta$  7.41 – 7.43 (m, 2H), 7.29 – 7.36 (m, 3H), 6.63 – 6.70 (m, 2H), 6.29 (s, 1H), 2.39 (s, 3H);  $^{13}\text{C}$  NMR (125 MHz,  $\text{CDCl}_3$ )  $\delta$  167.1, 150.1, 135.8, 130.4, 129.0, 128.8, 127.1, 120.6, 100.3, 20.7; IR (neat): 3502, 3084, 1770, 1371, 1190, 1016, 945; MS ( $\text{ES}^+$ ) Calculated for  $[\text{C}_{12}\text{H}_{11}\text{BrNaO}_2]^+$ : 289.0; Found: 289.0.

**(1Z, 3E)-1-Bromo-5-phenylpenta-1, 3-dien-2-yl acetate**

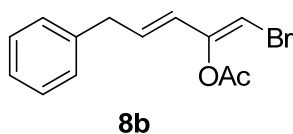

Compound **8b** was prepared in 91 % yield according to the general procedure (eluent: ethyl acetate: hexanes = 1: 40).  $^1\text{H}$  NMR (500 MHz,  $\text{CDCl}_3$ )  $\delta$  7.29 – 7.32 (m, 2H), 7.23 – 7.25 (m, 1H), 7.16 – 7.17 (m, 1H), 6.09 (s, 1H), 5.97 – 6.03 (m, 2H), 3.43 (d,  $J$  = 5.5 Hz), 2.28 (s, 3H);  $^{13}\text{C}$  NMR (125 MHz,  $\text{CDCl}_3$ )  $\delta$  167.1, 149.7, 139.0, 131.7, 128.9, 128.8, 126.7, 123.6, 98.8, 38.6, 20.7; IR (neat): 3419, 1768, 1653, 1643, 1633, 1196, 700; MS ( $\text{ES}^+$ ) Calculated for  $[\text{C}_{13}\text{H}_{13}\text{BrNaO}_2]^+$ : 303.0; Found: 303.0.

**(1Z, 3E)-1, 7-Dibromohepta-1, 3-dien-2-yl acetate**

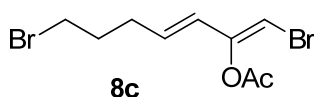

Compound **8c** was prepared in 96 % yield according to the general procedure (eluent: ethyl acetate: hexanes = 1: 40).  $^1\text{H}$  NMR (500 MHz,  $\text{CDCl}_3$ )  $\delta$  6.09 (s, 1H), 6.06 (d, 1H,  $J$  = 16.0 Hz), 5.76 (dt, 1H,  $J$  = 16.0, 7.0 Hz), 3.39 (t, 2H,  $J$  = 7.0 Hz), 2.30 (s, 3H), 2.25 – 2.28 (m, 2H), 1.94 – 1.99 (m, 2H);  $^{13}\text{C}$  NMR (125 MHz,  $\text{CDCl}_3$ )  $\delta$  167.1, 149.6, 131.0, 123.7, 98.7, 33.0, 31.6, 30.7, 20.7; IR (neat): 2920, 1770, 1702, 1432, 1371, 1194, 1016, 937; MS ( $\text{ES}^+$ ) Calculated for  $[\text{C}_9\text{H}_{12}\text{Br}_2\text{KO}_2]^+$ : 348.9; Found: 348.9.

**(1Z, 3E)-1-Bromo-8-(tert-butyldimethylsilyloxy)octa-1, 3-dien-2-yl acetate**

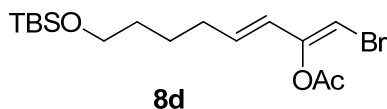

Compound **8d** was prepared in 86 % yield according to the general procedure (eluent: ethyl acetate: hexanes = 1: 50).  $^1\text{H}$  NMR (500 MHz,  $\text{CDCl}_3$ )  $\delta$  6.04 (s, 1H), 5.99 (d, 1H,  $J$  = 15.5 Hz), 5.81 (dt, 1H,  $J$  = 15.5, 6.5 Hz), 3.59 (t, 2H,  $J$  = 5.8 Hz), 2.29 (s, 3H), 2.11 (q, 2H,  $J$  = 7.0 Hz), 1.43 – 1.52 (m, 4H), 0.89 (s, 9H), 0.04 (s, 6H);  $^{13}\text{C}$  NMR (125 MHz,  $\text{CDCl}_3$ )  $\delta$  167.2, 149.9, 133.5, 122.4, 97.8, 63.1, 32.5, 32.3, 26.2, 25.2, 20.7, 18.6, –5.1;

IR (neat): 2939, 1736, 1651, 1240, 1198, 1045; MS ( $\text{ES}^+$ ) Calculated for  $[\text{C}_{16}\text{H}_{29}\text{BrNaO}_3\text{Si}]^+$ : 399.1; Found: 399.1.

**(1Z, 3E)-1-Bromo-8-(2, 5-dioxo-2, 5-dihydro-1H-pyrrol-1-yl) octa-1, 3-dien-2-yl acetate**

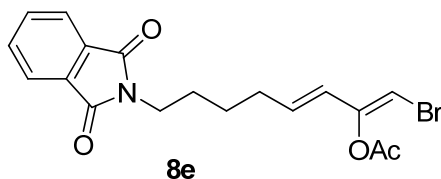

Compound **8e** was prepared in 88 % yield according to the general procedure (eluent: ethyl acetate: hexanes = 1: 30).  $^1\text{H}$  NMR (500 MHz,  $\text{CDCl}_3$ )  $\delta$  7.81–7.85 (m, 2H), 7.69–7.73 (m, 2H), 6.04 (s, 1H), 5.98 (d, 1H,  $J = 16.0$  Hz), 5.78 (dt, 1H,  $J = 16.0, 7.0$  Hz), 3.68 (t, 2H,  $J = 7$  Hz), 2.28 (s, 3H), 2.11–2.16 (m, 2H), 1.71–1.65 (m, 2H), 1.48–1.42 (m, 2H);  $^{13}\text{C}$  NMR (125 MHz,  $\text{CDCl}_3$ )  $\delta$  168.6, 167.1, 149.7, 134.1, 132.7, 132.3, 123.4, 122.8, 98.1, 37.8, 31.9, 28.2, 26.0, 20.7; IR (neat): 3460, 1768, 1709, 1396, 1371, 1188, 721; MS ( $\text{ES}^+$ ) Calculated for  $[\text{C}_{18}\text{H}_{18}\text{BrNNaO}_4]^+$ : 414.0; Found: 414.0.

**(1Z, 3E)-8-(Benzyloxy)-1-bromoocta-1, 3-dien-2-yl acetate**

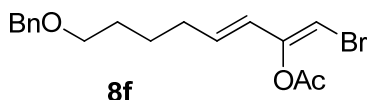

Compound **8f** was prepared in 90 % yield according to the general procedure (eluent: ethyl acetate: hexanes = 1: 30).  $^1\text{H}$  NMR (500 MHz,  $\text{CDCl}_3$ )  $\delta$  7.33–7.37 (m, 4H), 7.28–7.32 (m, 1H), 6.04 (s, 1H), 6.00 (d, 1H,  $J = 15.5$  Hz), 5.81 (dt, 1H,  $J = 15.5, 7.0$  Hz), 4.50 (s, 2H), 3.47 (t, 2H,  $J = 6.0$  Hz), 2.29 (s, 3H), 2.09–2.14 (m, 2H), 1.59–1.63 (m, 2H), 1.49–1.54 (m, 2H);  $^{13}\text{C}$  NMR (125 MHz,  $\text{CDCl}_3$ )  $\delta$  167.1, 149.8, 138.7, 133.3, 128.6, 127.8, 127.7, 122.5, 73.1, 70.2, 32.2, 29.4, 25.5, 20.7; IR (neat): 2918, 2850, 1770, 1718, 1371, 1194; MS ( $\text{ES}^+$ ) Calculated for  $[\text{C}_{17}\text{H}_{21}\text{BrNaO}_3]^+$ : 352.1; Found: 352.1.

**(2E, 7E, 9Z)-Ethyl 9-acetoxy-10-bromodeca-2, 7, 9-trienoate**

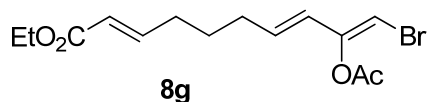

Compound **8g** was prepared in 88 % yield according to the general procedure (eluent: ethyl acetate: hexanes = 1: 60).  $^1\text{H}$  NMR (500 MHz,  $\text{CDCl}_3$ )  $\delta$  6.92 (dt, 1H,  $J = 15.5, 7.0$  Hz), 6.06 (s, 1H), 5.99 (d, 1H,  $J = 15.5$  Hz), 5.74 – 5.82 (m, 2H), 4.18 (q, 2H,  $J = 7.0$  Hz), 2.29 (s, 3H), 2.17 – 2.21 (m, 2H), 2.10 – 2.14 (m, 2H), 1.55 – 1.63 (m, 2H), 1.28 (t, 3H,  $J = 7.0$  Hz);  $^{13}\text{C}$  NMR (125 MHz,  $\text{CDCl}_3$ )  $\delta$  167.1, 166.8, 149.7, 148.5, 132.4, 123.0, 122.0, 60.4, 31.8, 31.6, 27.1, 20.7, 14.5; IR (neat): 2929, 1770, 1716, 1651, 1371, 1190, 1043; MS ( $\text{ES}^+$ ) Calculated for  $[\text{C}_{14}\text{H}_{19}\text{BrNaO}_4]^+$ : 353.0; Found: 353.0.

**(1Z, 3E)-1-Bromohexa-1, 3-dien-2-yl pivalate**

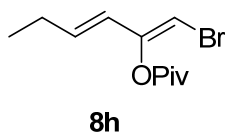

Compound **8h** was prepared in 88 % yield according to the general procedure (eluent: ethyl acetate: hexanes = 1: 40).  $^1\text{H}$  NMR (400 MHz,  $\text{CDCl}_3$ )  $\delta$  6.03 (s, 1H), 5.99 (d, 1H,  $J = 15.6$  Hz), 5.74 (dt, 1H,  $J = 15.6, 6.4$  Hz), 2.08 – 2.12 (m, 2H), 1.37 (s, 9H), 1.01 (t,  $J = 7.6$  Hz, 3H);  $^{13}\text{C}$  NMR (125 MHz,  $\text{CDCl}_3$ )  $\delta$  174.5, 149.8, 134.5, 121.7, 101.8, 97.5, 39.6, 27.6, 25.5, 13.1; IR (neat): 3424, 2966, 1760, 1642, 1265, 1108; Calculated for  $[\text{C}_{11}\text{H}_{17}\text{BrNaO}_2]^+$ : 283.03; Found: 283.06.

**(1Z, 3E)-1-bromo-5-methylhexa-1, 3-dien-2-yl pivalate**

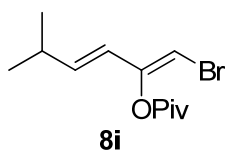



Compound **8i** was prepared in 90 % yield according to the general procedure (eluent: ethyl acetate: hexanes = 1: 40).  $^1\text{H}$  NMR (500 MHz,  $\text{CDCl}_3$ )  $\delta$  6.04 (s, 1H), 5.95 (dd, 1H,  $J = 16.0, 1.5$  Hz), 5.74 (dd, 1H,  $J = 16.0, 6.5$  Hz), 2.32 – 2.35 (m, 1H), 1.37 (s, 9H), 1.00 (d,  $J = 6.5$  Hz, 6H);  $^{13}\text{C}$  NMR (125 MHz,  $\text{CDCl}_3$ )  $\delta$  174.5, 149.9, 139.7, 119.9, 97.6, 39.6, 30.9, 27.5, 22.0; IR (neat): 2962, 2871, 1759, 1479, 1265, 1107, 962, 748; MS ( $\text{ES}^+$ ) Calculated for  $[\text{C}_{12}\text{H}_{19}\text{BrNaO}_2]^+$ : 297.1; Found: 297.1.

**(1Z, 3E)-1-chloroocta-1, 3-dien-2-yl 4-methoxybenzoate**

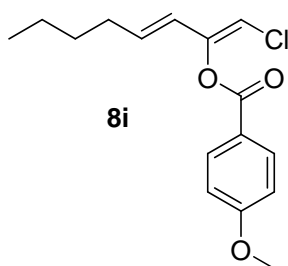

Compound **8i** was prepared in 85 % yield according to the general procedure (eluent: ethyl acetate: hexanes = 1: 80).  $^1\text{H}$  NMR (500 MHz,  $\text{CDCl}_3$ )  $\delta$  8.13 – 8.16 (m, 2H), 6.97 – 6.99 (m, 2H), 6.04 (d, 1H,  $J = 16.0$  Hz), 6.03 (s, 1H), 5.86 (dt, 1H,  $J = 16.0, 7.2$  Hz), 3.89 (s, 3H), 2.08 – 2.12 (m, 2H), 1.19 – 1.39 (m, 4H), 0.87 (t, 3H,  $J = 7.2$  Hz);  $^{13}\text{C}$  NMR (125 MHz,  $\text{CDCl}_3$ )  $\delta$  164.2, 162.7, 148.1, 133.4, 132.6, 121.8, 121.1, 114.1, 108.9, 55.7, 332.2, 31.0, 22.4, 14.0; IR (neat): 1738, 1604, 1510, 1246, 1167, 1072, 845.; MS ( $\text{ES}^+$ ) Calculated for  $[\text{C}_{16}\text{H}_{19}\text{ClNaO}_3]^+$ : 317.1; Found: 317.1.

**Dimethyl 3-butyl-5-(4-methoxybenzoyloxy) phthalate**

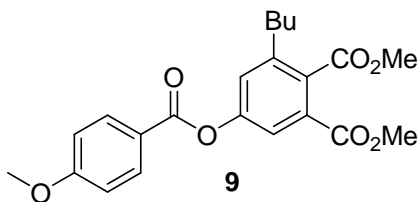

An oven-dried vial was charged with diene **8j** (0.1 mmol) and dimethyl acetylenedicarboxylate (0.2 mmol). Anisole (0.25 mL) was added. The reaction mixture was stirred at 185 °C for 10 h and then cooled to room temperature. After removed solvent under *vacuum* and the residue was purified to give **9** in 75% yield through silica gel flash column chromatography (eluents: ethyl acetate: hexanes = 1:15). <sup>1</sup>H NMR (400 MHz, CDCl<sub>3</sub>) δ 8.13 – 8.16 (m, 2H), 7.70 (d, 1H, *J* = 2.4 Hz), 7.30 (d, 1H, *J* = 2.4 Hz), 6.97 – 7.00 (m, 2H), 3.94 (s, 3H), 3.90 (s, 3H), 3.88 (s, 3H), 2.63 (t, 2H, *J* = 6.0 Hz), 1.58 – 1.64 (m, 2H), 1.34 – 1.39 (m, 2H), 0.92 (t, 2H, *J* = 7.2 Hz); <sup>13</sup>C NMR (125 MHz, CDCl<sub>3</sub>) δ 169.6, 165.7, 164.6, 164.4, 151.3, 142.6, 132.7, 132.6, 129.5, 127.0, 121.4, 121.3, 114.1, 55.7, 52.8, 52.7, 33.3, 33.1, 22.7, 14.0; IR (neat): 3450, 2954, 1738, 1730, 1510, 1252, 1169, 1134, 1057, 847; MS (ES<sup>+</sup>) Calculated for [C<sub>22</sub>H<sub>24</sub>NaO<sub>7</sub>]<sup>+</sup>: 423.1; Found: 423.1.

**7-Butyl-4-chloro-1, 3-dioxo-2-phenyl-2, 3, 3a, 4, 7, 7a-hexahydro-1H-isoindol-5-yl 4-methoxybenzoate**

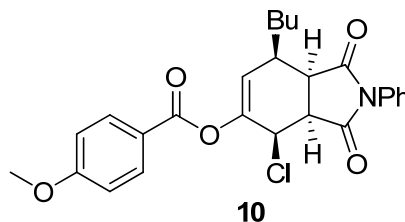

An oven-dried vial was charged with diene **8j** (0.1 mmol) and *N*-phenylmaleimide (0.15 mmol). Anisole (0.25 mL) was added. The reaction mixture was stirred at 100 °C for 18 h and then cooled to room temperature. After removed solvent under *vacuum*, the residue was purified to give cycloadduct **10** in 77% yield through silica gel flash column chromatography (eluents: ethyl acetate: hexanes =1:8). <sup>1</sup>H NMR (400 MHz, CDCl<sub>3</sub>) δ 8.06 – 8.09 (m, 2H), 7.47 – 7.51 (m, 2H), 7.39 – 7.43 (m, 1H), 7.33 – 7.35 (m, 2H), 6.96 – 6.98 (m, 2H), 6.05 (d, 1H, *J* = 6.8 Hz), 5.10 (d, 1H, *J* = 6.4 Hz), 3.94 (dd, 1H, *J* = 10.4, 6.4 Hz), 3.91 (s, 3H), 3.54 – 3.59 (m, 1H), 3.11 – 3.16 (m, 1H), 2.18 – 2.24 (m, 1H), 1.31 – 1.49 (m, 3H), 0.92 (t, 3H, *J* = 6.4 Hz); <sup>13</sup>C NMR (125 MHz, CDCl<sub>3</sub>)

$\delta$  175.8, 173.6, 165.3, 164.5, 146.9, 132.6, 131.9, 129.4, 129.0, 126.8, 123.7, 120.9, 114.2, 55.8, 51.2, 46.9, 40.5, 33.9, 31.3, 30.3, 22.9, 14.2; IR (neat): 3450, 1716, 1604, 1510, 1384, 1257, 1169; MS ( $\text{ES}^+$ ) Calculated for  $[\text{C}_{26}\text{H}_{26}\text{ClNNaO}_5]^+$ : 490.1; Found: 490.1.

**(3E, 5Z)-Deca-3, 5-dien-5-yl pivalate**

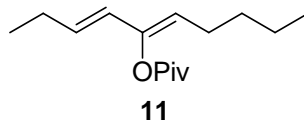

To a mixture of  $\text{NiCl}_2(\text{dppp})$  (11mg, 8 mol %) and pivalate **8h** (50 mg) in dry THF (2mL) was added n-BuMgCl (0.2 mL, 2N in THF, 2eq) dropwise at 0 °C under  $\text{N}_2$ . After stirred for 6h at room temperature, the mixture was cooled to 0 °C. Another n-BuMgCl (0.2mL, 2N in THF, 2eq) was added dropwise. The reaction mixture was stirred overnight at room temperature and then quenched with saturated  $\text{NH}_4\text{Cl}$ . After extracted with ether, dried and concentrated, the residue was purified to give product **11** (30 mg) in 67% yield through flash column chromatography on silica gel (eluent: ethyl acetate: hexanes = 1: 20).  $^1\text{H}$  NMR (400 MHz,  $\text{CDCl}_3$ )  $\delta$  5.92 (d, 1H,  $J = 15.6$  Hz), 5.54 – 5.61 (m, 1H), 5.21 (t, 1H,  $J = 7.6$  Hz), 2.06 – 2.17 (m, 2H), 2.06 – 2.17 (m, 2H), 1.91– 1.97 (m, 2H), 1.27– 1.34 (m, 4H), 1.32 (s, 9H), 1.01 (t,  $J = 7.6$  Hz, 3H), 0.87(t,  $J = 7.2$  Hz, 3H);  $^{13}\text{C}$  NMR (125 MHz,  $\text{CDCl}_3$ )  $\delta$  175.9, 145.7, 130.8, 124.1, 120.0, 39.4, 31.2, 27.6, 25.6, 25.4, 22.7, 14.1, 13.5.; IR (neat): 3423, 3002, 1751, 1128, 1287, 952; Calculated for  $[\text{C}_{15}\text{H}_{26}\text{NaO}_2]^+$ : 216.2; Found: 216.2.

**(1Z, 3E)-1-Phenylhexa-1,3-dien-2-yl pivalate**

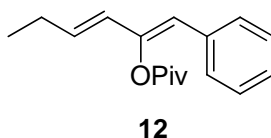

An oven-dried Schlenk tube was charged with SPhos (6.7 mg, 8 mol %),  $\text{Pd}_2(\text{dba})_3$  (7.5mg, 4mol %), phenylboronic acid (50 mg, 2eq) and anhydrous  $\text{K}_3\text{PO}_4$  (130 mg, 3eq). The mixture was evacuated and flushed with  $\text{N}_2$  for 3 times. A solution of pivalate **8h**

(50 mg) in dry toluene (1.5 mL) was added. The reaction mixture was stirred at 100 °C for 8 h and then cooled to room temperature. After filtered through a small pad of celite and removed solvent under *vacuum*, the residue was purified to give product **12** (31mg) in 63% yield through flash column chromatography on silica gel (eluent: ethyl acetate: hexanes =1: 20). <sup>1</sup>H NMR (400 MHz, CDCl<sub>3</sub>) δ 7.38 – 7.40 (m, 2H), 7.27 – 7.31 (m, 2H), 7.19 – 7.22 (m, 1H), 6.17 (s, 1H), 5.99 (d, 1H, *J* = 15.6 Hz), 5.79 (dt, 1H, *J* = 15.6, 6.4 Hz), 2.14 – 2.20 (m, 2H), 1.33 (s, 9H), 1.05 (t, *J* = 7.2 Hz, 3H); <sup>13</sup>C NMR (125 MHz, CDCl<sub>3</sub>) δ 175.4, 146.2, 134.6, 133.1, 128.8, 128.3, 127.4, 124.9, 118.8, 39.4, 27.7, 25.6, 13.4; IR (neat): 3705, 2966, 2874, 1749, 1586, 1107, 956; Calculated for [C<sub>17</sub>H<sub>22</sub>NaO<sub>2</sub>]<sup>+</sup>: 281.2; Found: 281.2.

**(4Z,6E)-1-(Benzyloxy)nona-4,6-dien-2-yn-5-yl pivalate**

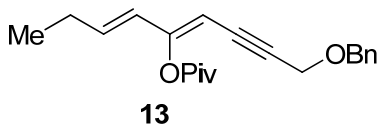

To a mixture of PdCl<sub>2</sub>(Ph<sub>3</sub>P)<sub>2</sub> (10 mg, 7.5 mol %), CuI (9.7 mg, 25 mol%) and Et<sub>2</sub>NH (0.2mL) was added a solution of pivalate **8h** (50 mg) and (prop-2-ynyloxy) methylbenzene (1.5eq) in dry THF (2mL) under N<sub>2</sub>. The reaction mixture was stirred at 60 °C for 18 h and then cooled to room temperature. After filtered through a small pad of Celite<sup>TM</sup> and removed solvent under *vacuum*, the residue was purified to give product **13** (47mg) in 76% yield through flash column chromatography on silica gel (eluent: ethyl acetate: hexanes =1: 20). <sup>1</sup>H NMR (400 MHz, CDCl<sub>3</sub>) δ 7.30 – 7.35 (m, 4H), 7.27 – 7.29 (m, 1H), 6.02 (d, 1H, *J* = 15.6 Hz), 5.81 (dt, 1H, *J* = 15.6, 6.4 Hz), 5.35 (s, 1H), 4.57 (s, 2H), 4.29 (d, 2H, *J* = 2.4Hz), 2.13 – 2.20 (m, 2H), 1.35(s, 9H), 1.01(t, *J* = 7.6 Hz, 3H); <sup>13</sup>C NMR (125 MHz, CDCl<sub>3</sub>) δ 175.1, 155.8, 137.6, 136.3, 128.5, 128.2, 128.0, 123.1, 98.4, 92.7, 81.3, 71.6, 58.1, 39.5, 27.5, 25.6, 13.1; IR (neat): 3419, 2971, 2213, 1754, 1642, 1352, 1113, 736; Calculated for [C<sub>21</sub>H<sub>26</sub>NaO<sub>3</sub>]<sup>+</sup>: 349.2; Found: 349.2.

H1\_CDCL3

exp2 s2pul

|                    |                |            |        |
|--------------------|----------------|------------|--------|
| SAMPLE             |                | DEC. & VT  |        |
| date               | 9 Apr 2010     | dn         | F19    |
| solvent            | CDCl3          | dof        | 0      |
| file               | /nmr500/Zhang~ | dm         | nnn    |
| /Yawang/vy22-36-sm |                | dmm        | C      |
| -h1.fid            |                | dmt        | 200    |
| ACQUISITION        |                | PROCESSING |        |
| sfrq               | 499.859        | fn         | 32768  |
| tn                 | H1             | math       | i      |
| at                 | 2.668          |            |        |
| np                 | 32000          | weft       |        |
| sw                 | 5987.0         | wexp       |        |
| fb                 | 3000           | wbs        |        |
| bs                 | 4              | wht        |        |
| pw                 | 7.0            | DISPLAY    |        |
| tpwr               | 7.0            | sp         | -5.3   |
| di                 | 53             | wp         | 398.5  |
| tof                | 1.000          | vs         | 24     |
| nt                 | 0              | sc         | 0      |
| ct                 | 512            | wc         | 250    |
| alock              | 26             | h2mm       | 16.00  |
| gain               | n              | is         | 259.57 |
| FLAGS              | not used       | rfl        | 4133.2 |
| il                 | n              | rfl        | 3629.0 |
| in                 | n              | th         | 48     |
| dp                 | y              | ins        | 3.000  |
| hs                 | nn             | ai         | ph     |

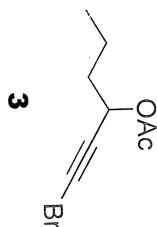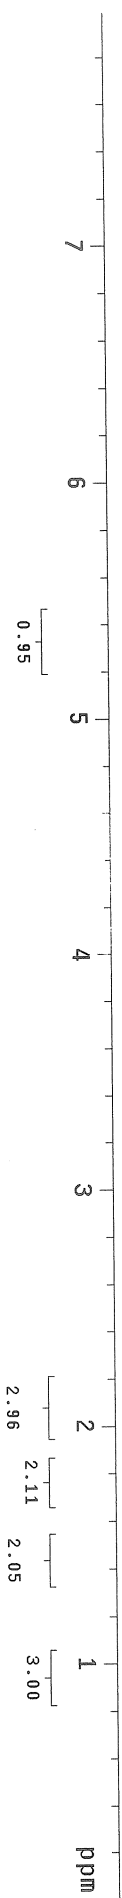

STANDARD CARBON PARAMETERS

exp1 CARBON

| SAMPLE      |                     | SPECIAL         |          |
|-------------|---------------------|-----------------|----------|
| date        | Apr 9 2010          | temp            | 22.0     |
| solvent     | cdcl3               | gain            | 54       |
| file        | /mmr500/Zhang*/     | sp in           | not used |
|             | /Yawang/WY22-56-sm* | hs t            | 0.008    |
|             | -c13.fid            | pw90            | 9.200    |
|             |                     | al fa           | 10.000   |
| ACQUISITION |                     | FLAGS           |          |
| sw          | 28258.6             | 11              | n        |
| at          | 1.300               | in              | n        |
| np          | 73498               | dp              | y        |
| fb          | 16000               | hs              | nm       |
| bs          | 4                   | PROCESSING 0.50 |          |
| d1          | 3.000               | 1b              | 2        |
| nt          | 1e+06               | 1s fid          | not used |
| ct          | 129                 | fn              | not used |
| TRANSMITTER |                     | DISPLAY         |          |
| tn          | C13                 | sp              | -1324.9  |
| sffq        | 125.702             | wp              | 28258.1  |
| tof         | 865.4               | rf1             | 11032.2  |
| tpwr        | 56                  | rfp             | 9707.0   |
| pw          | 6.000               | rfp             | -20.1    |
| DECOUPLER   |                     | 1p              | -942.8   |
| dn          | H1                  | PLOT            |          |
| dof         | 0                   | wc              | 250      |
| dm          | nm                  | sc              | 0        |
| decwave     |                     | vs              | 1736     |
| dpwr        | 36                  | th              | 9        |
| dmf         | 11101               | al              | cdc ph   |

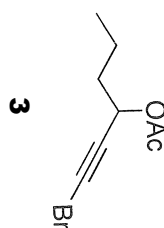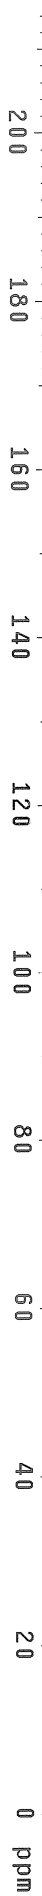

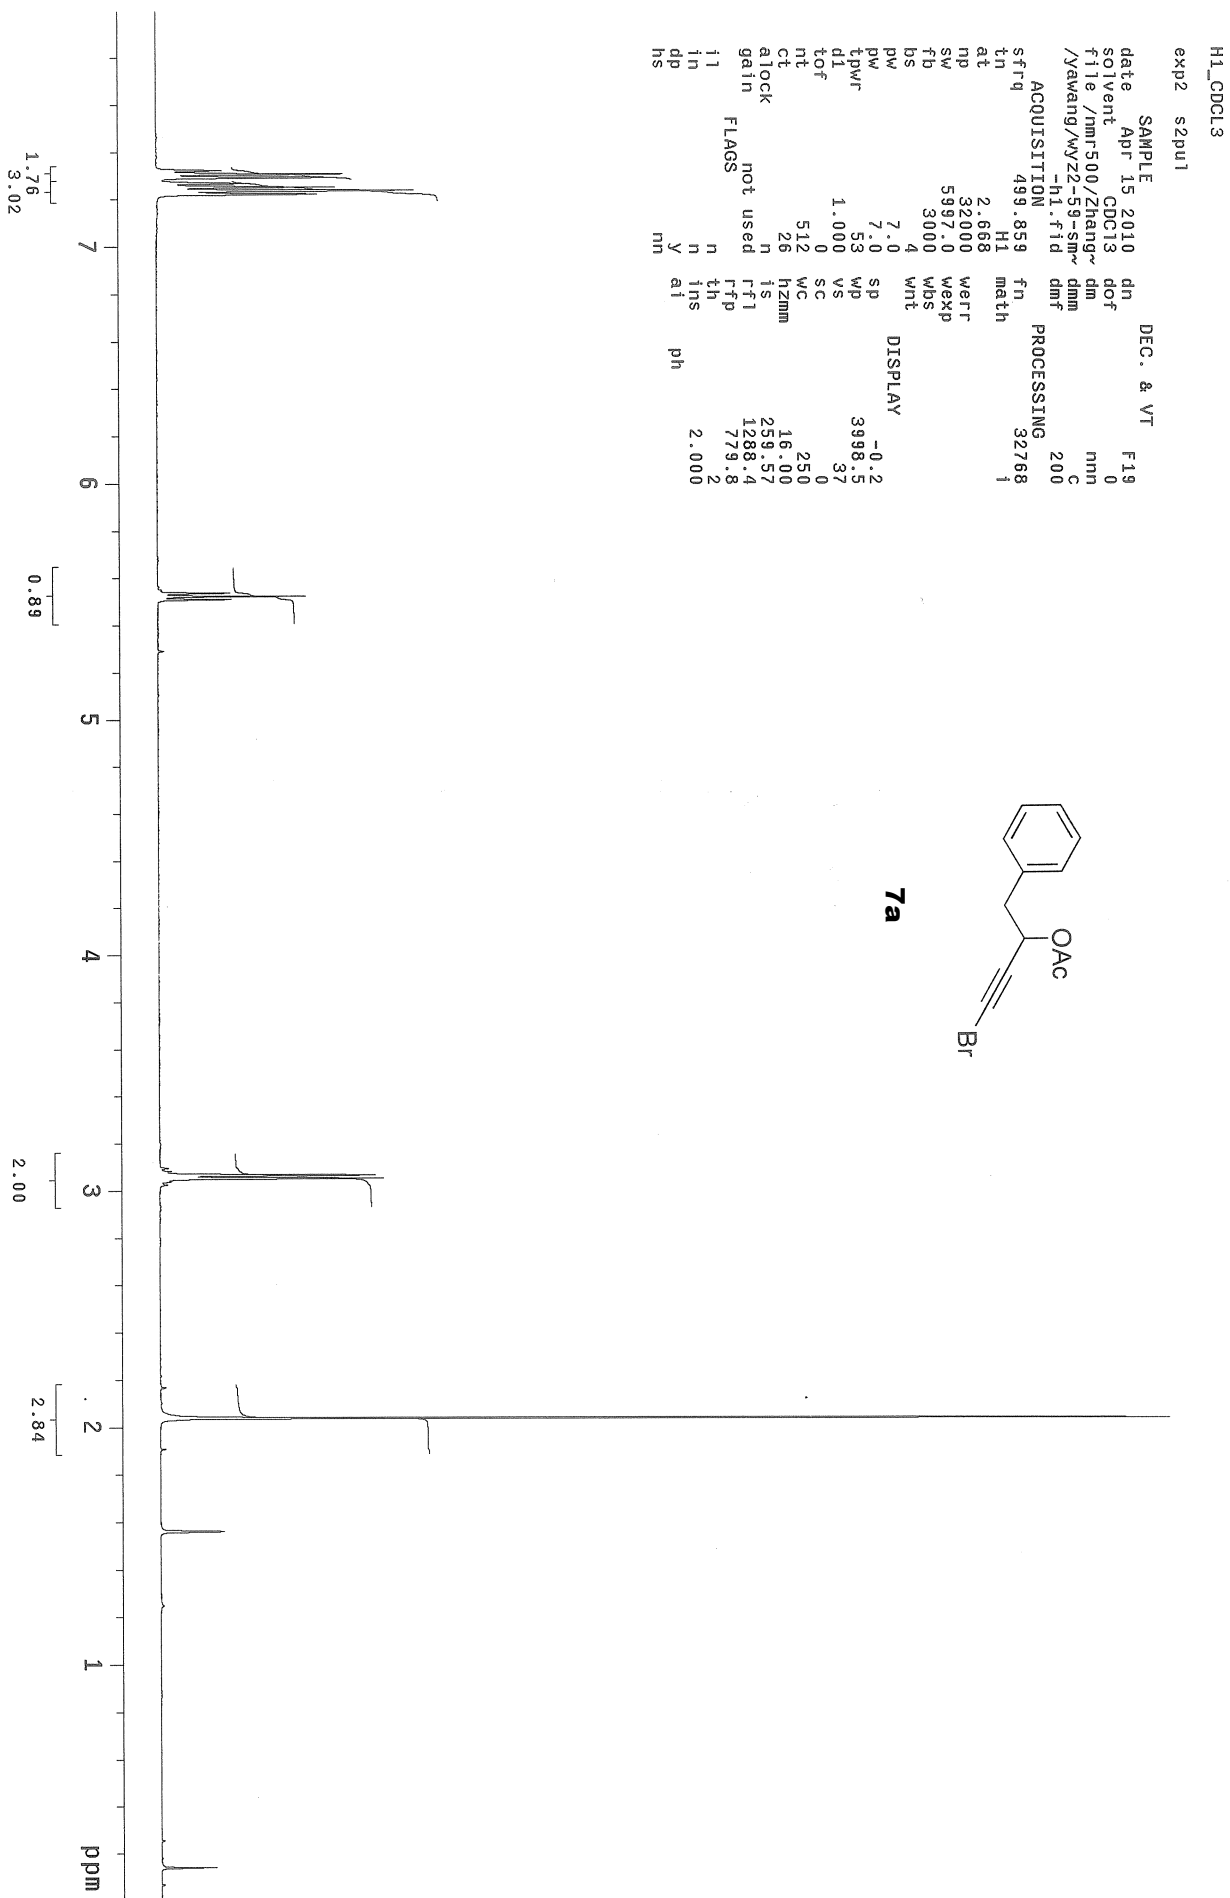

STANDARD CARBON PARAMETERS

exp1 CARBON

| SAMPLE              |                | SPECIAL    |          |
|---------------------|----------------|------------|----------|
| date                | Apr 9 2010     | temp       | 22.0     |
| solvent             | cdcl3          | gain       | 54       |
| file                | /nmr500/Zhang~ | sp in      | not used |
| /yawang/wy22-59-sm~ | hst            | 0.008      |          |
| -c13.fid            | pw90           | 9.200      |          |
| ACQUISITION         | alfta          | 10.000     |          |
| sw                  | 28258.6        | FLAGS      |          |
| at                  | 1.300          | 11         | n        |
| np                  | 73498          | in         | n        |
| fb                  | 16000          | dp         | y        |
| bs                  | 4              | hs         | nm       |
| d1                  | 3.000          | PROCESSING | 0.50     |
| nt                  | 1e+06          | 1b         | 2        |
| ct                  | 129            | isfid      | not used |
| fn                  | not used       |            |          |
| TRANSMITTER         | C13            | DISPLAY    |          |
| tn                  | 125.702        | sp         | -541.5   |
| sfrq                | 865.4          | wd         | 24490.4  |
| tof                 | 56             | rf1        | 11033.7  |
| tpwr                | 6.000          | rfp        | 9707.0   |
| pw                  | 6.000          | tp         | -43.2    |
| DECOUPLER           | H1             | 1p         | -899.3   |
| dn                  | 0              | PLOT       |          |
| dof                 | 0              | WC         | 250      |
| dm                  | nmv            | SC         | 0        |
| decwave             | 36             | VS         | 1714     |
| dpwr                | 11101          | tn         | 10       |
| dmf                 | at             | cdc        | ph       |

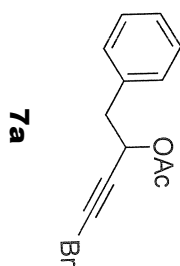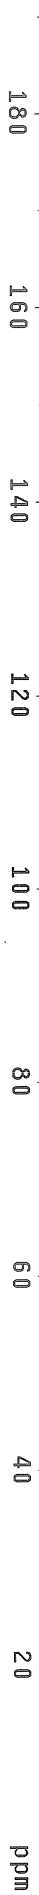



1b-I-136-2  
exp1 PROTON

|             |               |               |          |
|-------------|---------------|---------------|----------|
| SAMPLE      |               | PRESATURATION |          |
| date        | Mar 16 2010   | satmode       | n        |
| solvent     | CDCl3         | wet           | n        |
| file        | exp           | SPECIAL       | n        |
| ACQUISITION |               | temp          | 22.0     |
| sw          | 7997.6        | gain          | not used |
| at          | 2.049         | spin          | 20       |
| np          | 32768         | hst           | 0.008    |
| fb          | 4000          | pw90          | 9.100    |
| bs          | 2             | alfa          | 6.600    |
| di          | 1.000         | FLAGS         |          |
| nt          | 8             | i1            | n        |
| ct          | 8             | in            | n        |
| TRANSMITTER |               | dp            | y        |
| tn          | H1            | hs            | nn       |
| sfrq        | 499.859       | fn            | not used |
| tof         | 499.9         | DISPLAY       |          |
| tpwr        | 4.550         | SP            | -184.0   |
| DECOUPLER   |               | wp            | 4819.8   |
| dn          | C13           | rff1          | 999.7    |
| dof         | 0             | rffp          | 0        |
| dm          | nmn           | fp            | -25.3    |
| decwave     | W40_5mm3G1~1p | lp            | 3.0      |
| dprf        | 47            | WC            | 215      |
| dmf         | 32258         | VS            | 35       |
|             |               | th            | 62       |
|             |               | nm            | 2        |
|             |               | cds           | ph       |

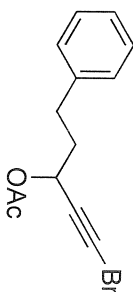

**7b**

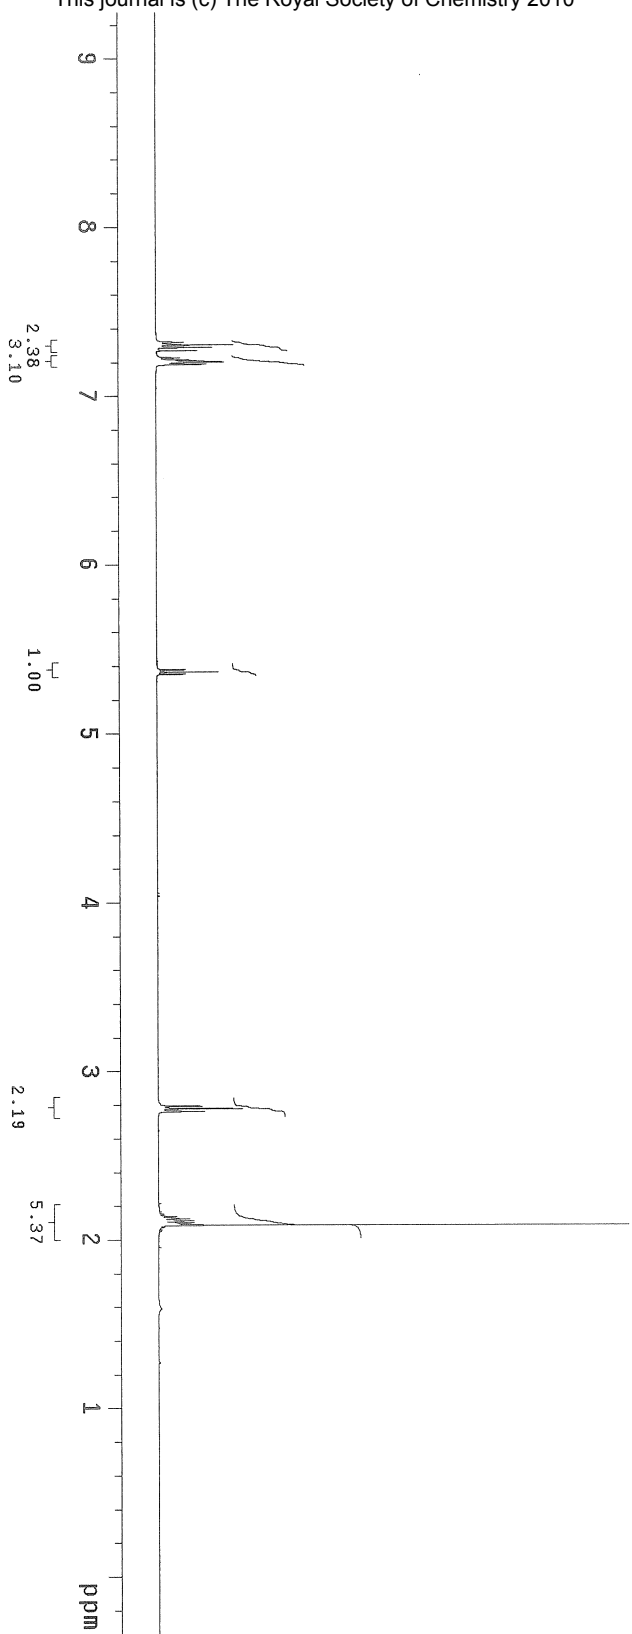

1b-I-136-2-C13

exp1 CARBON

|                    |                |                 |          |
|--------------------|----------------|-----------------|----------|
| SAMPLE             |                | SPECIAL         |          |
| date               | Mar 17 2010    | temp            | 22.0     |
| solvent            | cdcl3          | gain            | 54       |
| file               | /nmr500/Zhangw | spin            | 20       |
| /bio1u/1b-I-136-2- |                | hst             | 0.008    |
| -C13.fid           |                | pw90            | 9.200    |
|                    |                | alifa           | 10.000   |
| ACQUISITION        |                | FLAGS           |          |
| sw                 | 28258.6        | il              | n        |
| at                 | 1.300          | in              | n        |
| np                 | 73498          | dp              | y        |
| fb                 | 16000          | hs              | nn       |
| bs                 | 4              | PROCESSING 0.50 |          |
| d1                 | 3.000          | lb              | 2        |
| nt                 | 1000           | lsfid           | not used |
| ct                 | 220            | fn              |          |
| TRANSMITTER        |                | DISPLAY         |          |
| tn                 | C13            | sp              | -305.9   |
| sfrq               | 125.702        | wp              | 24019.1  |
| tof                | 865.4          | rfl             | 11033.5  |
| tpwr               | 56             | rtp             | 9707.0   |
| pw                 | 6.000          | tp              | -19.2    |
| DECOUPLER          |                | PLOT            |          |
| dn                 | H1             | ip              | -932.0   |
| dof                | 0              | wc              | 250      |
| dm                 | mny            | sc              | 0        |
| decwave            |                | vs              | 2015     |
| dpwr               | 36             | th              | 13       |
| dmt                | 11101          | at              | cdc ph   |

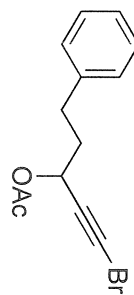

**7b**

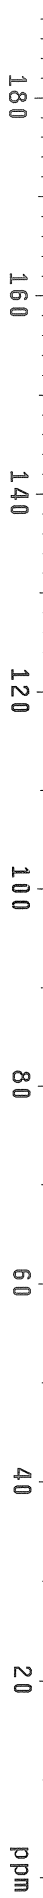

STANDARD PROTON PARAMETERS

expt1 PROTON

|                     |                |               |          |
|---------------------|----------------|---------------|----------|
| SAMPLE              |                | PRESATURATION |          |
| date                | Mar 14 2010    | satmode       | n        |
| solvent             | CDCl3          | wet           | n        |
| file                | /nmr500/Zhang~ | SPECIAL       | 22.0     |
| /biao1u/1b-1-130-2~ |                | temp          | not used |
| ACQUISITION .fid    |                | gain          | 20       |
| sw                  | 7997.6         | spin          | 0.008    |
| at                  | 2.049          | hst           | 9.100    |
| np                  | 32768          | pw90          | 6.600    |
| fb                  | 4000           | alpha         |          |
| bs                  | 2              | FLAGS         |          |
| dl                  | 1.000          | i1            | n        |
| nt                  | 8              | in            | y        |
| ct                  | 8              | hs            | nn       |
| TRANSMITTER         |                | PROCESSING    |          |
| tn                  | H1             | fn            | not used |
| sfrq                | 499.859        | DISPLAY       |          |
| tof                 | 499.9          | sp            | -254.7   |
| tpwr                | 53             | wp            | 4760.8   |
| pw                  | 4.550          | tf1           | 4631.9   |
| DECOUPLER           |                | rfp           | 3629.0   |
| dn                  | C13            | tp            | -38.2    |
| dof                 | 0              | 1p            | -2.4     |
| dm                  | nm             | PLOT          |          |
| decwave             | W40_5mm3gi~    | WC            | 250      |
| dpwr                | 47             | SC            | 0        |
| dmf                 | 32258          | VS            | 13       |
|                     | at             | th            | 4        |
|                     |                | ph            |          |

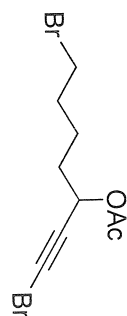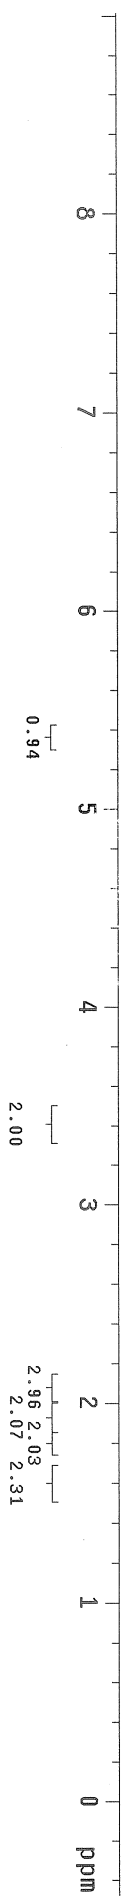

1b-I-130-2-C13  
exp1 CARBON

| SAMPLE              |                | SPECIAL    |         |
|---------------------|----------------|------------|---------|
| date                | Mar 15 2010    | temp       | 22.0    |
| solvent             | cdcl3          | gain       | 54      |
| file                | /nmr500/2hang~ | spin       | 20      |
| /biao1u/1b-I-130-2~ | hst            | 0.008      |         |
| -C13.fid            | pw90           | 9.200      |         |
| ACQUISITION         | alfa           | 10.000     |         |
| sw                  | 28258.6        | FLAGS      |         |
| at                  | 1.300          | i1         | n       |
| np                  | 73498          | in         | n       |
| fb                  | 16000          | dp         | y       |
| bs                  | 10             | hs         | nn      |
| d1                  | 3.000          | PROCESSING |         |
| nt                  | 1000           | lb         | 0.50    |
| ct                  | 630            | lsfid      | 2       |
| fn                  | not used       |            |         |
| TRANSMITTER         | C13            | DISPLAY    |         |
| in                  | 125.702        | sp         | -252.9  |
| sfrq                | 865.4          | wp         | 23705.2 |
| tof                 | 56             | rfl        | 11032.6 |
| tpwr                | 6.000          | rfp        | 9707.0  |
| pw                  | DECOUPLER      | rp         | 88.4    |
| dn                  | H1             | tp         | -940.7  |
| dof                 | 0              | PLOT       |         |
| dm                  | ny             | wc         | 250     |
| decwve              | 36             | sc         | 0       |
| dpwr                | 11101          | vs         | 767     |
| dmf                 | at             | th         | 8       |
|                     |                | cdc        | ph      |

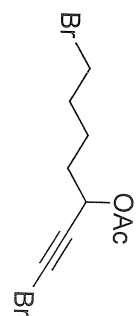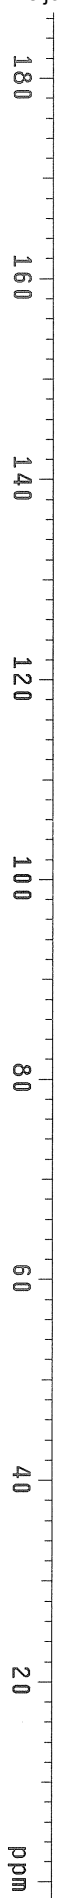

H1\_CDCL3

exp2 s2pul

|                     |                |            |        |
|---------------------|----------------|------------|--------|
| SAMPLE              |                | DEC. & VT  |        |
| date                | May 13 2010    | dn         | F19    |
| solvent             | CDCl3          | dof        | 0      |
| file                | /nmr500/Zhangw | dm         | mm     |
| /Yawang/WY22-68-smr |                | dmm        | C      |
| -h1-2nd.fid         |                | dmf        | 200    |
| ACQUISITION         |                | temp       | 22.0   |
| sfrq                | 499.859        | PROCESSING | 32768  |
| tn                  | H1             | fn         | 1      |
| at                  | 2.668          | math       |        |
| np                  | 32000          | werf       |        |
| sw                  | 5997.0         | wexp       |        |
| fb                  | 3000           | wbs        |        |
| bs                  | 4              | wnt        |        |
| pw                  | 7.0            | DISPLAY    |        |
| tpwr                | 53             | sp         | -250.2 |
| d1                  | 1.000          | wp         | 3998.5 |
| nt                  | 0              | vs         | 24     |
| ct                  | 512            | sc         | 0      |
| atlock              | 30             | WC         | 250    |
| gain                | n              | hzm        | 16.90  |
| FLAGS               | not used       | is         | 188.31 |
| il                  | n              | rfl        | 4131.7 |
| in                  | n              | rft        | 3629.0 |
| dp                  | y              | th         | 3      |
| hs                  | nm             | ai         | 2.000  |
|                     | ph             |            |        |

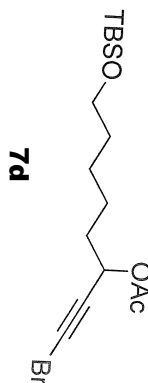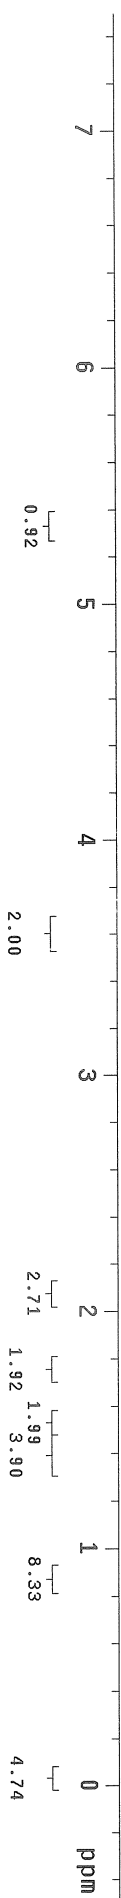

## STANDARD CARBON PARAMETERS

exp1 CARBON

| SPECIAL             |                |         |            |      |  |
|---------------------|----------------|---------|------------|------|--|
| date                | May 13 2010    | temp    | 22.0       |      |  |
| solvent             | cdc13          | gain    | 54         |      |  |
| file                | /mmr500/Zhangr | spin    | not used   |      |  |
| /yawang/wy25-65-smw | ht             | p90     | 0.008      |      |  |
| -C13-2nd.fid        | atfa           |         | 9.200      |      |  |
| ACQUISITION         |                |         | 10.000     |      |  |
| sw                  | 28258.6        | FLAGS   |            |      |  |
| at                  | 1.300          | i1      | n          |      |  |
| np                  | 73498          | in      | n          |      |  |
| fb                  | 16000          | dp      | y          |      |  |
| bs                  | 4              | hs      | m          |      |  |
| d1                  | 3.000          |         |            |      |  |
| nt                  | 1e+06          | 1b      | PROCESSING | 0.50 |  |
| ct                  | 129            | 1efid   | 2          |      |  |
| TRANSMITTER         |                |         |            |      |  |
| tn                  | C13            | sp      | not used   |      |  |
| sfrq                | 125.702        | DISPLAY | -1115.3    |      |  |
| tof                 | 865.4          | wf      | 24778.0    |      |  |
| tpwr                | 56             | rfl     | 11031.8    |      |  |
| pw                  | 6.000          | rfd     | 9707.0     |      |  |
| DECOUPLER           |                |         |            |      |  |
| dn                  | H1             | 1p      | -21.3      |      |  |
| dof                 | 0              |         | -917.5     |      |  |
| dm                  | any            | WC      | PLOT       |      |  |
| decouple            |                | SC      | 250        |      |  |
| dpwr                | 36             | ts      | 0          |      |  |
| dmf                 | 11101          | th      | 677        |      |  |
|                     |                | at      | 13         |      |  |
|                     |                | cdc     | ph         |      |  |

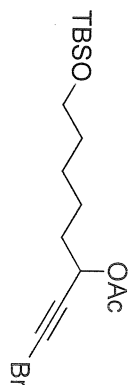

7d

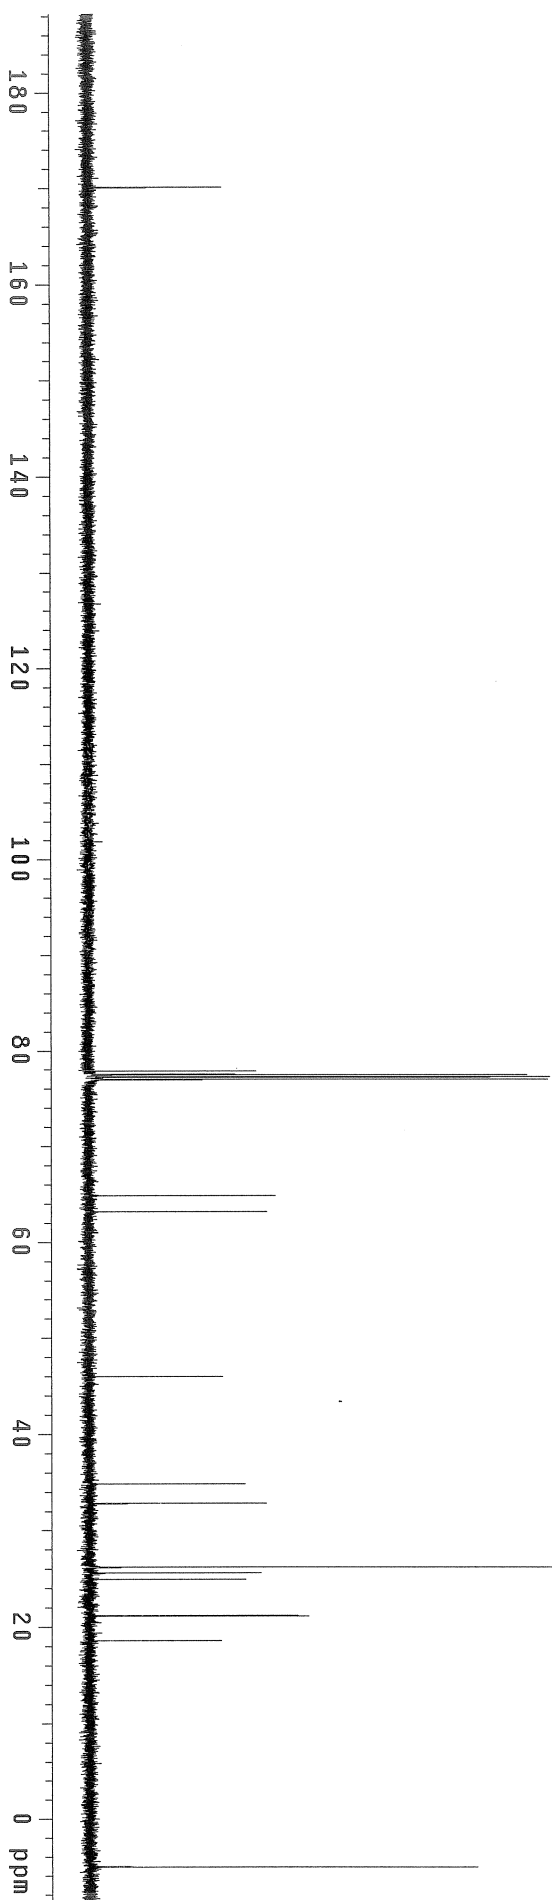

WY2-2-102-sm  
exp1 szpu1

|             |             |            |        |
|-------------|-------------|------------|--------|
| SAMPLE      |             | DEC. & VT  |        |
| date        | Aug 14 2010 | dn         | F19    |
| solvent     | CDC13       | dof        | 0      |
| file        | exp         | dm         | nmn    |
| ACQUISITION |             | dmf        | c      |
| sfrq        | 499.859     | dmf        | 200    |
| tn          | H1          | PROCESSING |        |
| at          | 2.699       | 1p         | 0.20   |
| mp          | 49200       | fr         | 32768  |
| sw          | 8003.2      | math       | 1      |
| fb          | 4000        |            |        |
| bs          | 2           | werf       |        |
| pw          | 9.0         | wexp       |        |
| tpwr        | 9.0         | wbs        |        |
| di          | 57          | wnt        |        |
| tof         | 3.000       | DISPLAY    |        |
| nt          | 0           | sp         | 28.4   |
| ct          | 16          | wp         | 5188.6 |
| alock       | 16          | vs         | 31     |
| gain        | n           | sc         | 0      |
| FLAGS       | not used    | wc         | 250    |
| il          | n           | hzm        | 20.75  |
| in          | n           | is         | 259.57 |
| dp          | y           | rfi        | 5133.8 |
| hs          | mn          | rfp        | 3629.0 |
|             |             | th         | 3      |
|             |             | ins        | 3.000  |
|             |             | ai         | ph     |

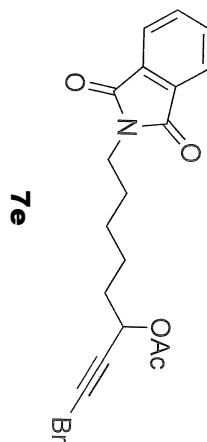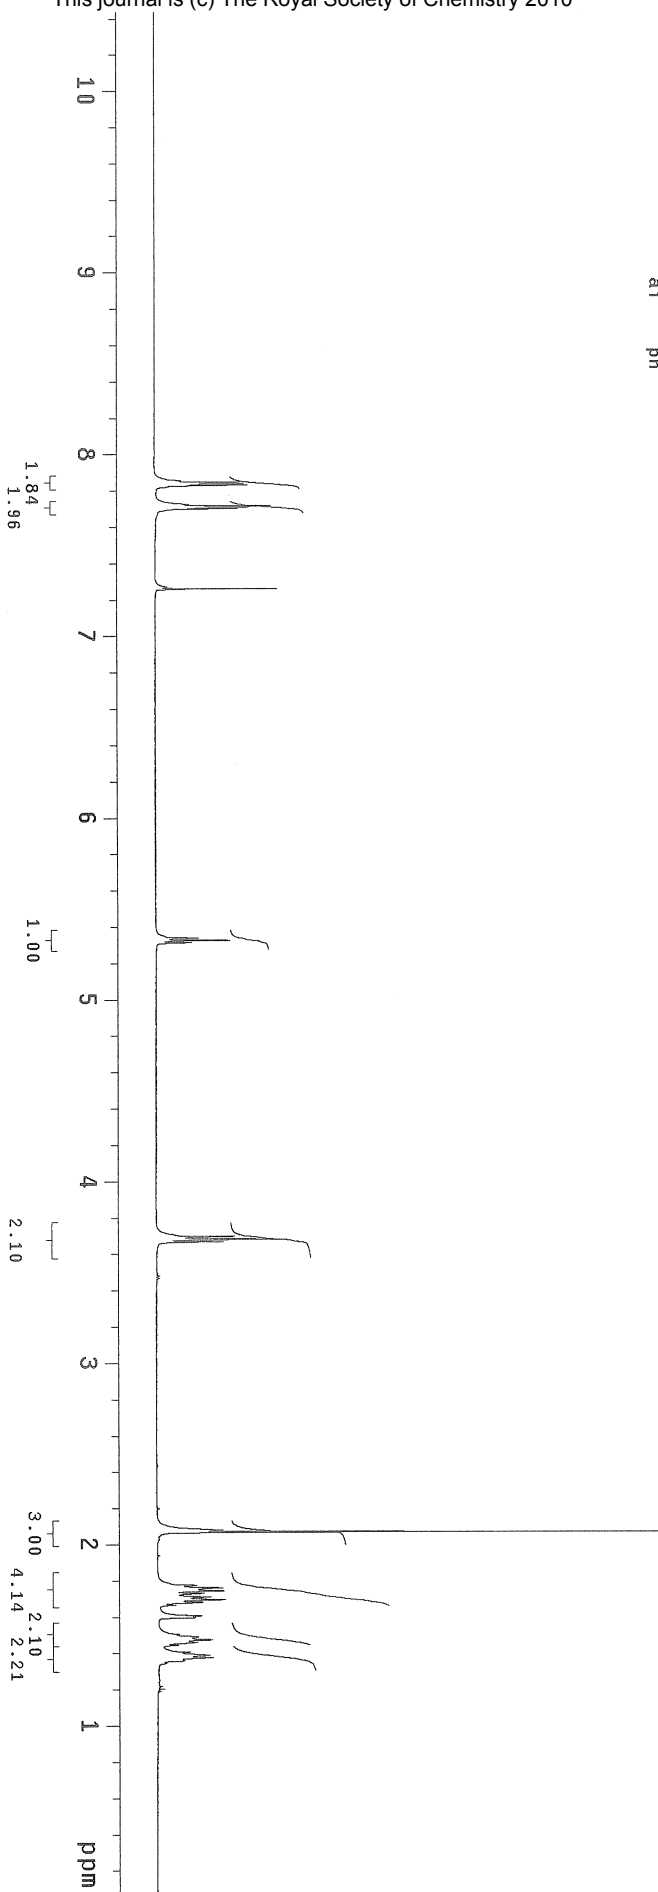

wyz-2-102-C13

exp1 CARBON

|             |             |            |          |
|-------------|-------------|------------|----------|
| SAMPLE      |             | SPECIAL    |          |
| date        | Aug 14 2010 | temp       | not used |
| solvent     | cdcl3       | gain       | 54       |
| file        | exp         | spin       | not used |
| ACQUISITION |             | hst        | 0.008    |
| sw          | 28258.6     | pw90       | 9.200    |
| at          | 1.300       | alpha      | 10.000   |
| np          | 73498       | FLAGS      |          |
| fb          | 16000       | i1         | n        |
| bs          | 5           | in         | n        |
| d1          | 3.000       | dp         | y        |
| nt          | 10000       | hs         | nm       |
| ct          | 1170        | PROCESSING |          |
| TRANSMITTER |             | lb         | 0.50     |
| tn          | C13         | tsfid      | 2        |
| sfreq       | 125.702     | fn         | not used |
| tof         | 865.4       | DISPLAY    |          |
| tpwr        | 56          | sp         | 885.4    |
| pw          | 13.500      | wp         | 23570.2  |
| DECOUPLER   |             | rff1       | 11033.6  |
| dn          | H1          | rffp       | 9707.0   |
| dof         | 0           | lp         | 172.3    |
| dm          | nm          | PLOT       |          |
| decwave     | 1p          | WC         | 250      |
| qpwr        | 36          | SC         | 0        |
| dmf         | 11101       | VS         | 2636     |
| th          | vs          | ai         | 6        |
| ai          | cdc         | ph         |          |

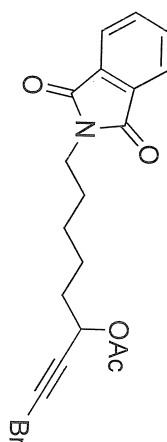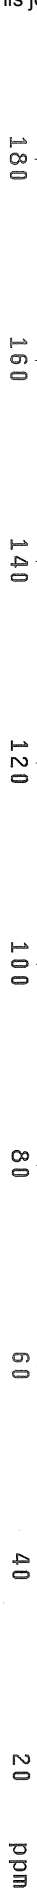



1b-I-3282008

expl s2pul

SAMPLE

DEC. & VT

date Mar 28 2010  
solvent cdcl3  
file /nmr400/Zhang/  
/biao/1b-I-3282008.fid

dn -1425.0  
dof nm  
dm nm  
dmf 200  
temp 22.0

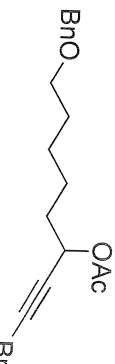

7f

ACQUISITION  
sfrq 399.951  
tn H1  
at 2.000  
np 20530  
sw 5132.5  
fb 3000  
bs 2  
pw 7.0  
tpwr 55  
d1 3.000  
tof 143.7  
nt 8  
ct 8  
atlock not used  
gain n  
fl n  
in n  
dp y  
hs nm

PROCESSING  
lb 0.10  
fn 65536  
math f  
wexp  
wds  
wht  
sp 144.8  
wp 3354.9  
vs 45  
wc 250  
hzm 13.42  
is 380.42  
rfi 3319.7  
rfp 2903.6  
ins 3  
ph 2.000

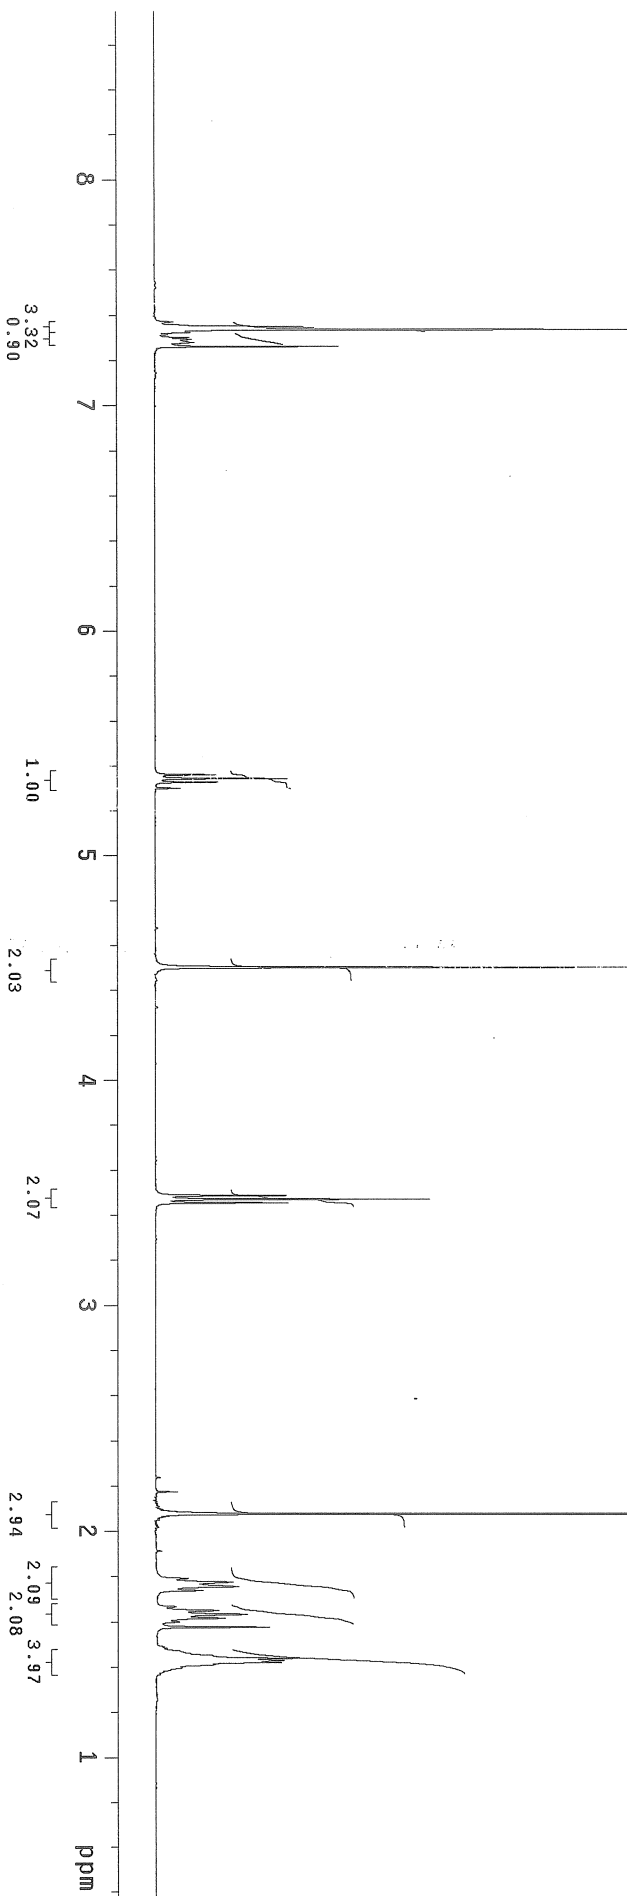

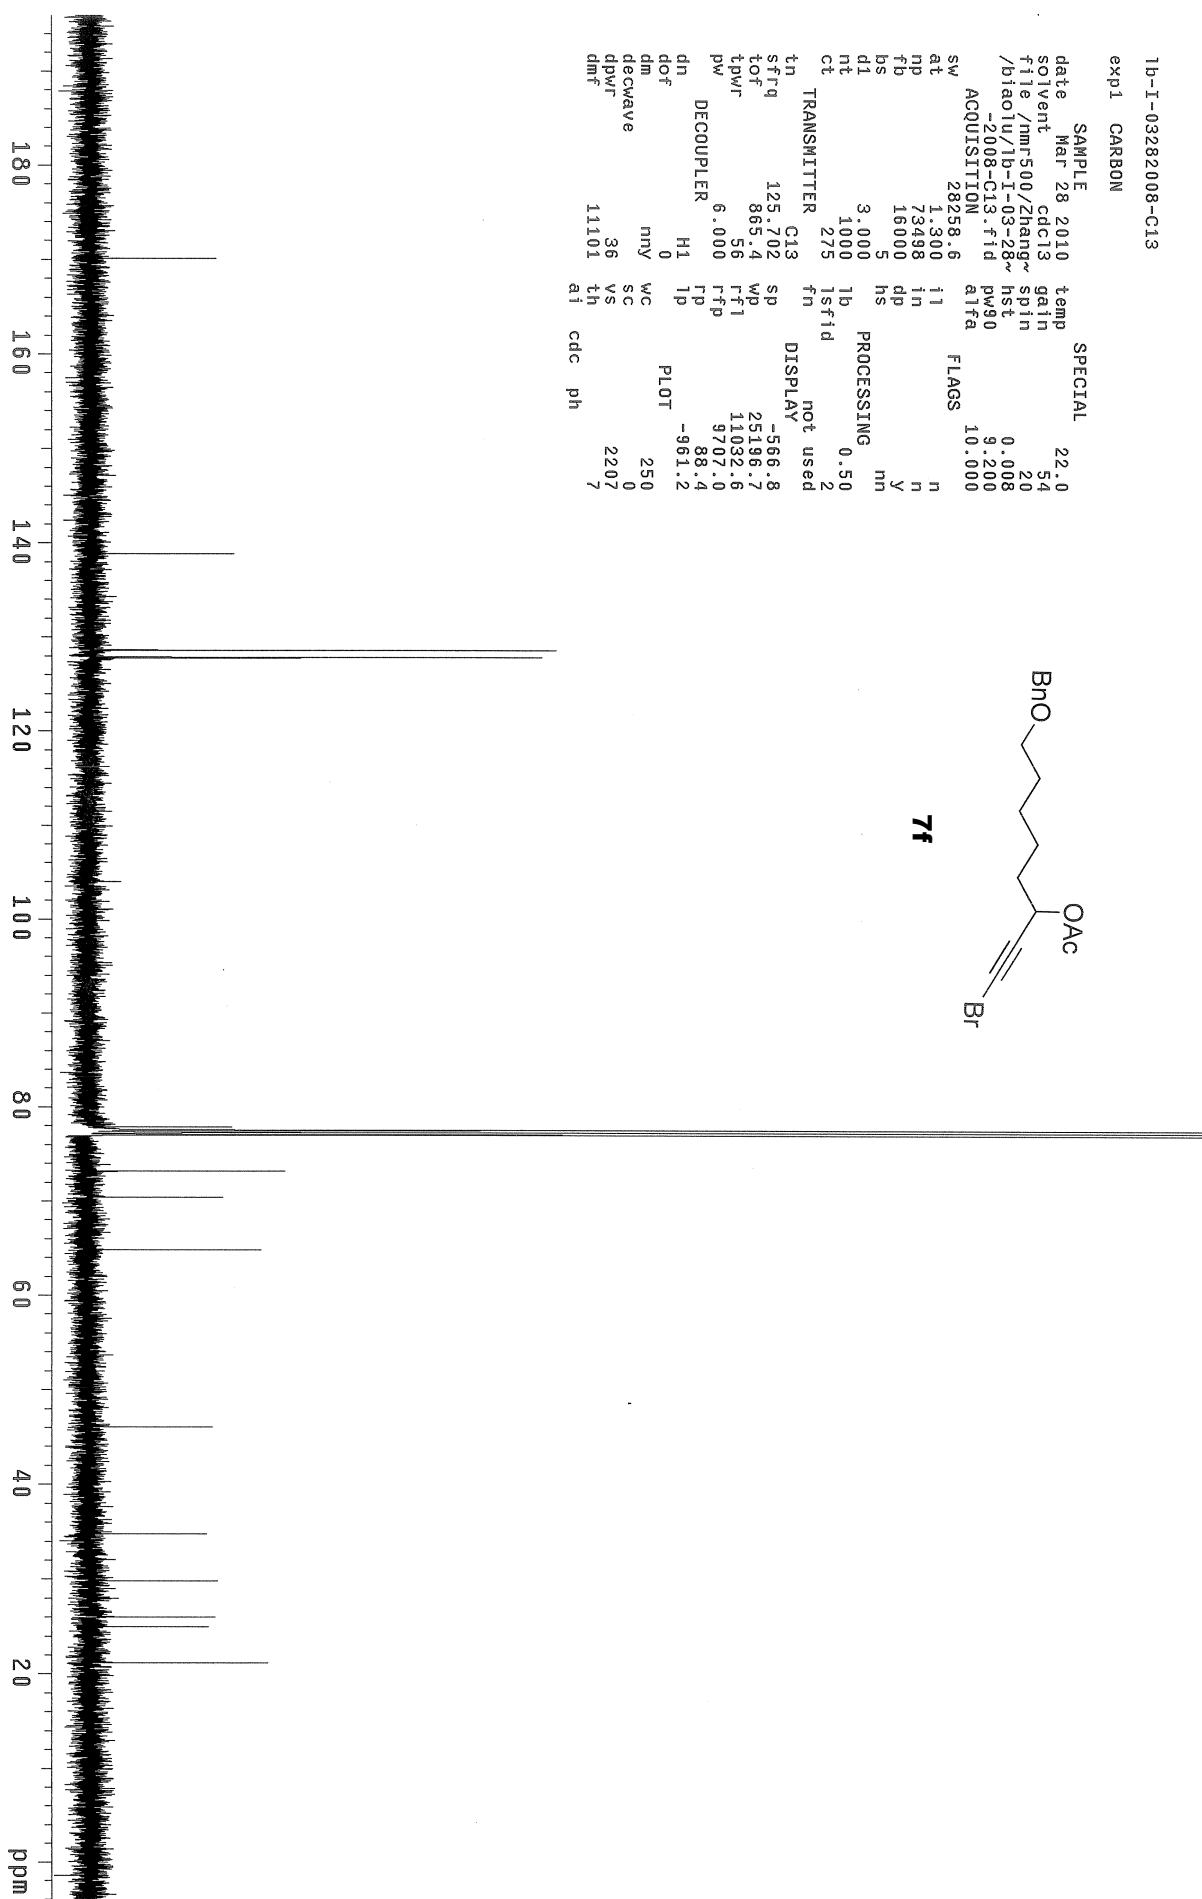

H1\_CDCL3

exp2 s2pul

|                     |                |            |        |
|---------------------|----------------|------------|--------|
| SAMPLE              |                | DEC. & VT  |        |
| date                | Jun 2 2010     | dn         | F19    |
| solvent             | CDCl3          | dof        | 0      |
| file                | /nmr500/Zhangw | dm         | mm     |
| /Yawang/wy22-104-sv |                | c          | mm     |
| m-h1.fid            |                | dmf        | 200    |
| ACQUISITION         |                | temp       | 22.0   |
| sfrq                | 499.859        | PROCESSING |        |
| tn                  | H1             | fn         | 32768  |
| at                  | 2.668          | math       | 1      |
| np                  | 32000          | werf       |        |
| sw                  | 5997.0         | wexp       |        |
| fb                  | 3000           | wbs        |        |
| bs                  | 4              | wnt        |        |
| pw                  | 7.0            | sp         | -0.2   |
| tpwr                | 53             | wp         | 398.5  |
| d1                  | 1.000          | vs         | 30     |
| tof                 | 0              | sc         | 0      |
| nt                  | 512            | WC         | 250    |
| ct                  | 25             | hzm        | 16.00  |
| atlock              | n              | is         | 124.38 |
| gain                | not used       | rfl        | 4131.7 |
| FLAGS               |                | rfd        | 3629.0 |
| il                  | n              | th         | 48     |
| in                  | n              | ins        | 3.000  |
| dp                  | nm             | ph         |        |
| hs                  | at             |            |        |

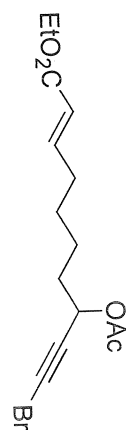

**7g**

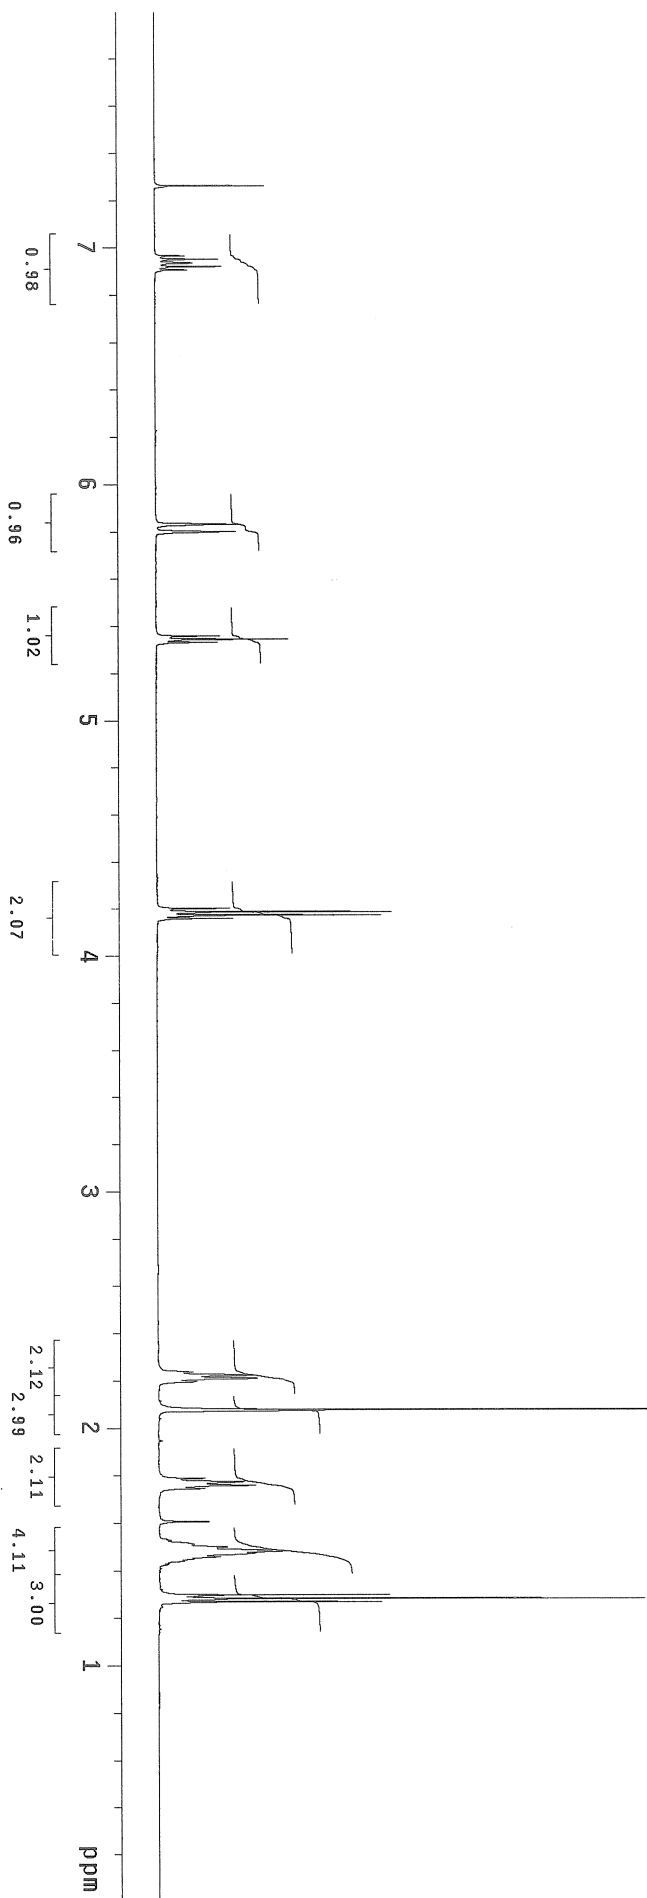

STANDARD CARBON PARAMETERS

expt1 CARBON

| SAMPLE      |                     | SPECIAL    |          |
|-------------|---------------------|------------|----------|
| date        | Jun 2 2010          | temp       | 22.0     |
| solvent     | cdcl3               | gain       | 54       |
| file        | /nmr500/Zhang*/     | sp in      | not used |
|             | /Yawang/WY22-104-S* | hs t       | 0.008    |
|             | m-c13.fid           | pw90       | 9.200    |
| ACQUISITION | alife               | 10.000     |          |
| sw          | 28258.6             | FLAGS      |          |
| at          | 1.300               | i1         | n        |
| np          | 73498               | in         | n        |
| fb          | 16000               | dp         | y        |
| bs          | 4                   | hs         | nn       |
| di          | 3.000               | PROCESSING | 0.50     |
| nt          | 1e+06               | lb         | 2        |
| ct          | 193                 | lsfid      | not used |
| TRANSMITTER | C13                 | fn         |          |
| tn          | 125.702             | sp         | -592.1   |
| sfrq        | 865.4               | wp         | 24882.8  |
| tof         | 56                  | rfl        | 11032.1  |
| tpwr        | 6.000               | rtp        | 9707.0   |
| pw          |                     | rfp        | -2.0     |
| DECOUPLER   | H1                  | tp         | -873.6   |
| dn          | 0                   | WC         | 250      |
| dof         | nmr                 | SC         | 0        |
| dm          |                     | VS         | 1813     |
| decwave     | 36                  | th         | 13       |
| dpwr        | 11101               | at         | cdc ph   |
| dmf         |                     |            |          |

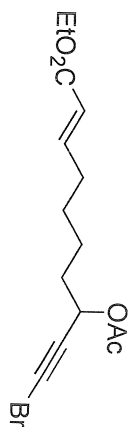

79

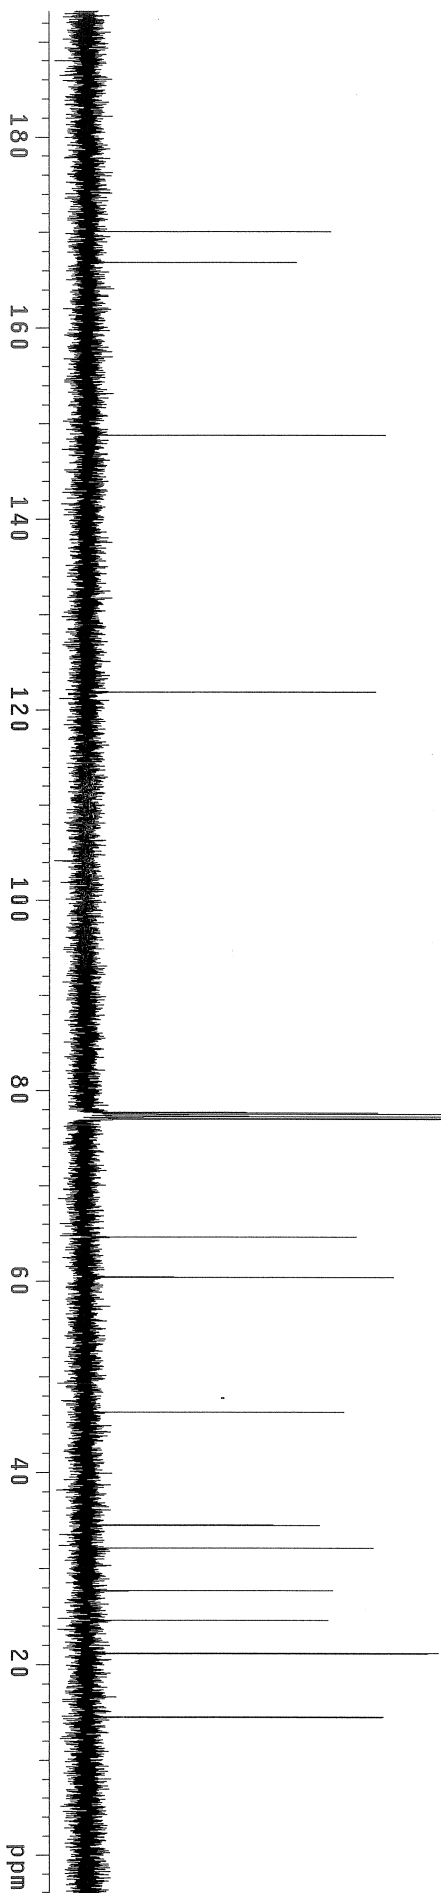

1b-II-piv  
exp3 s2pu1

|             |             |            |           |    |
|-------------|-------------|------------|-----------|----|
| date        | Aug 29 2010 | dn         | DEC. & VT | H1 |
| solvent     | cdcl3       | dof        | -1425.0   |    |
| file        | exp         | dm         | nm        |    |
| Acquisition | exp         | dm         | c         |    |
| sfrq        | 399.951     | dmf        | 200       |    |
| tn          | H1          | PROCESSING | 0.10      |    |
| at          | 2.502       | fn         | 65536     |    |
| np          | 36008       | math       | f         |    |
| sw          | 7196.8      |            |           |    |
| fb          | not used    |            |           |    |
| bs          | 2           | weir       |           |    |
| pw          | 8.0         | wexp       |           |    |
| tpwr        | 57          | wnt        |           |    |
| d1          | 3.000       | sp         | -490.4    |    |
| tof         | -6.9        | wp         | 4293.0    |    |
| nt          | 16          | vs         | 59        |    |
| ct          | 16          | sc         | 0         |    |
| alock       | n           | wc         | 250       |    |
| gain        | not used    | h2mm       | 17.20     |    |
| il          | n           | is         | 500.00    |    |
| in          | n           | rfl        | 4502.7    |    |
| dp          | y           | rtp        | 2903.6    |    |
| hs          | nm          | th         | 2         |    |
|             | at          | ph         | 2.000     |    |

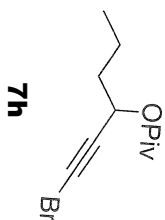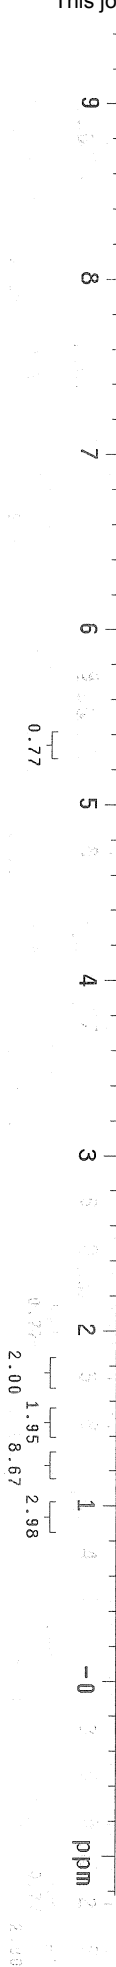

1b-II-piv  
exp1 CARBON

|             |         |            |          |
|-------------|---------|------------|----------|
| SAMPLE      |         | SPECIAL    |          |
| date        | Aug 29  | temp       | not used |
| solvent     | cdcl3   | gain       | 54       |
| file        | exp     | spin       | not used |
| ACQUISITION |         | hst        | 0.008    |
| sw          | 28258.6 | pw90       | 9.200    |
| at          | 1.300   | atfa       | 10.000   |
| np          | 73398   | FLAGS      |          |
| fb          | 16000   | il         | n        |
| bs          | 5       | in         | n        |
| d1          | 3.000   | dp         | y        |
| nt          | 10000   | hs         | nm       |
| ct          | 345     | PROCESSING |          |
| TRANSMITTER |         | lb         | 0.50     |
| tn          | C13     | lsfid      | 2        |
| strq        | 125.702 | fn         | not used |
| lof         | 865.4   | DISPLAY    |          |
| tpwr        | 56      | sp         | -436.5   |
| pw          | 13.500  | wp         | 26442.4  |
| DECOUPLER   |         | rfl        | 11035.1  |
| dn          | H1      | rfl        | 9707.0   |
| dof         | 0       | tp         | -72.3    |
| dm          | nmv     | tp         | -930.8   |
| decwave     |         | PLOT       |          |
| dpr         | 36      | wc         | 250      |
| dmf         | 11101   | sc         | 0        |
|             |         | th         | 1468     |
|             |         | ai         | 11       |

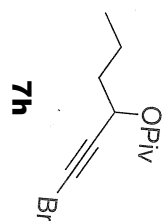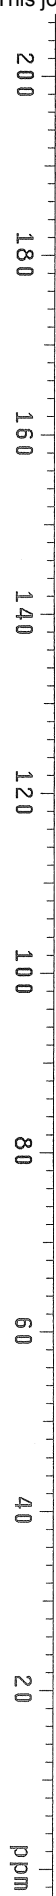

1b-I-177  
exp2 s2pu1

|             |            |           |            |
|-------------|------------|-----------|------------|
| SAMPLE      |            | DEC. & VT |            |
| date        | Apr 7 2010 | dn        | H1         |
| solvent     | cdc13      | dof       | -1425.0    |
| file        | cdc13      | dm        | mm         |
| ACQUISITION |            | dm        | 200        |
| sfrq        | 399.951    | dnt       | 2.00       |
| tn          | H1         | temp      | 22.0       |
| at          | 2.000      | lb        | PROCESSING |
| np          | 20530      | fn        | 0.10       |
| sw          | 5132.5     | math      | 65536      |
| fb          | 3000       | wer       |            |
| bs          | 2          | wexp      |            |
| pw          | 7.0        | wbs       |            |
| tpwr        | 55         | wnt       |            |
| d1          | 3.000      | sp        | DISPLAY    |
| tof         | 143.7      | wp        | -98.9      |
| nt          | 16         | vs        | 3237.6     |
| ct          | 16         | sc        | 28         |
| atlock      | n          | wc        | 0          |
| gain        | not used   | hzm       | 250        |
| il          | n          | is        | 12.95      |
| in          | y          | rfl       | 1083.88    |
| dp          | nm         | rft       | 422.8      |
| ns          |            | ins       | 1          |
|             |            | ai        | 9.000      |

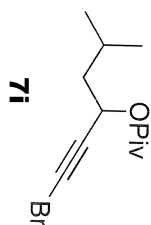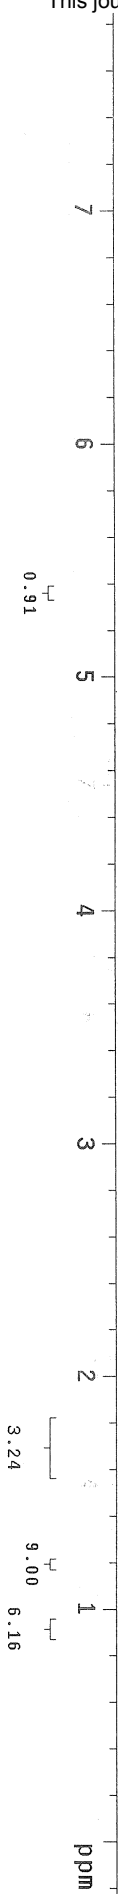

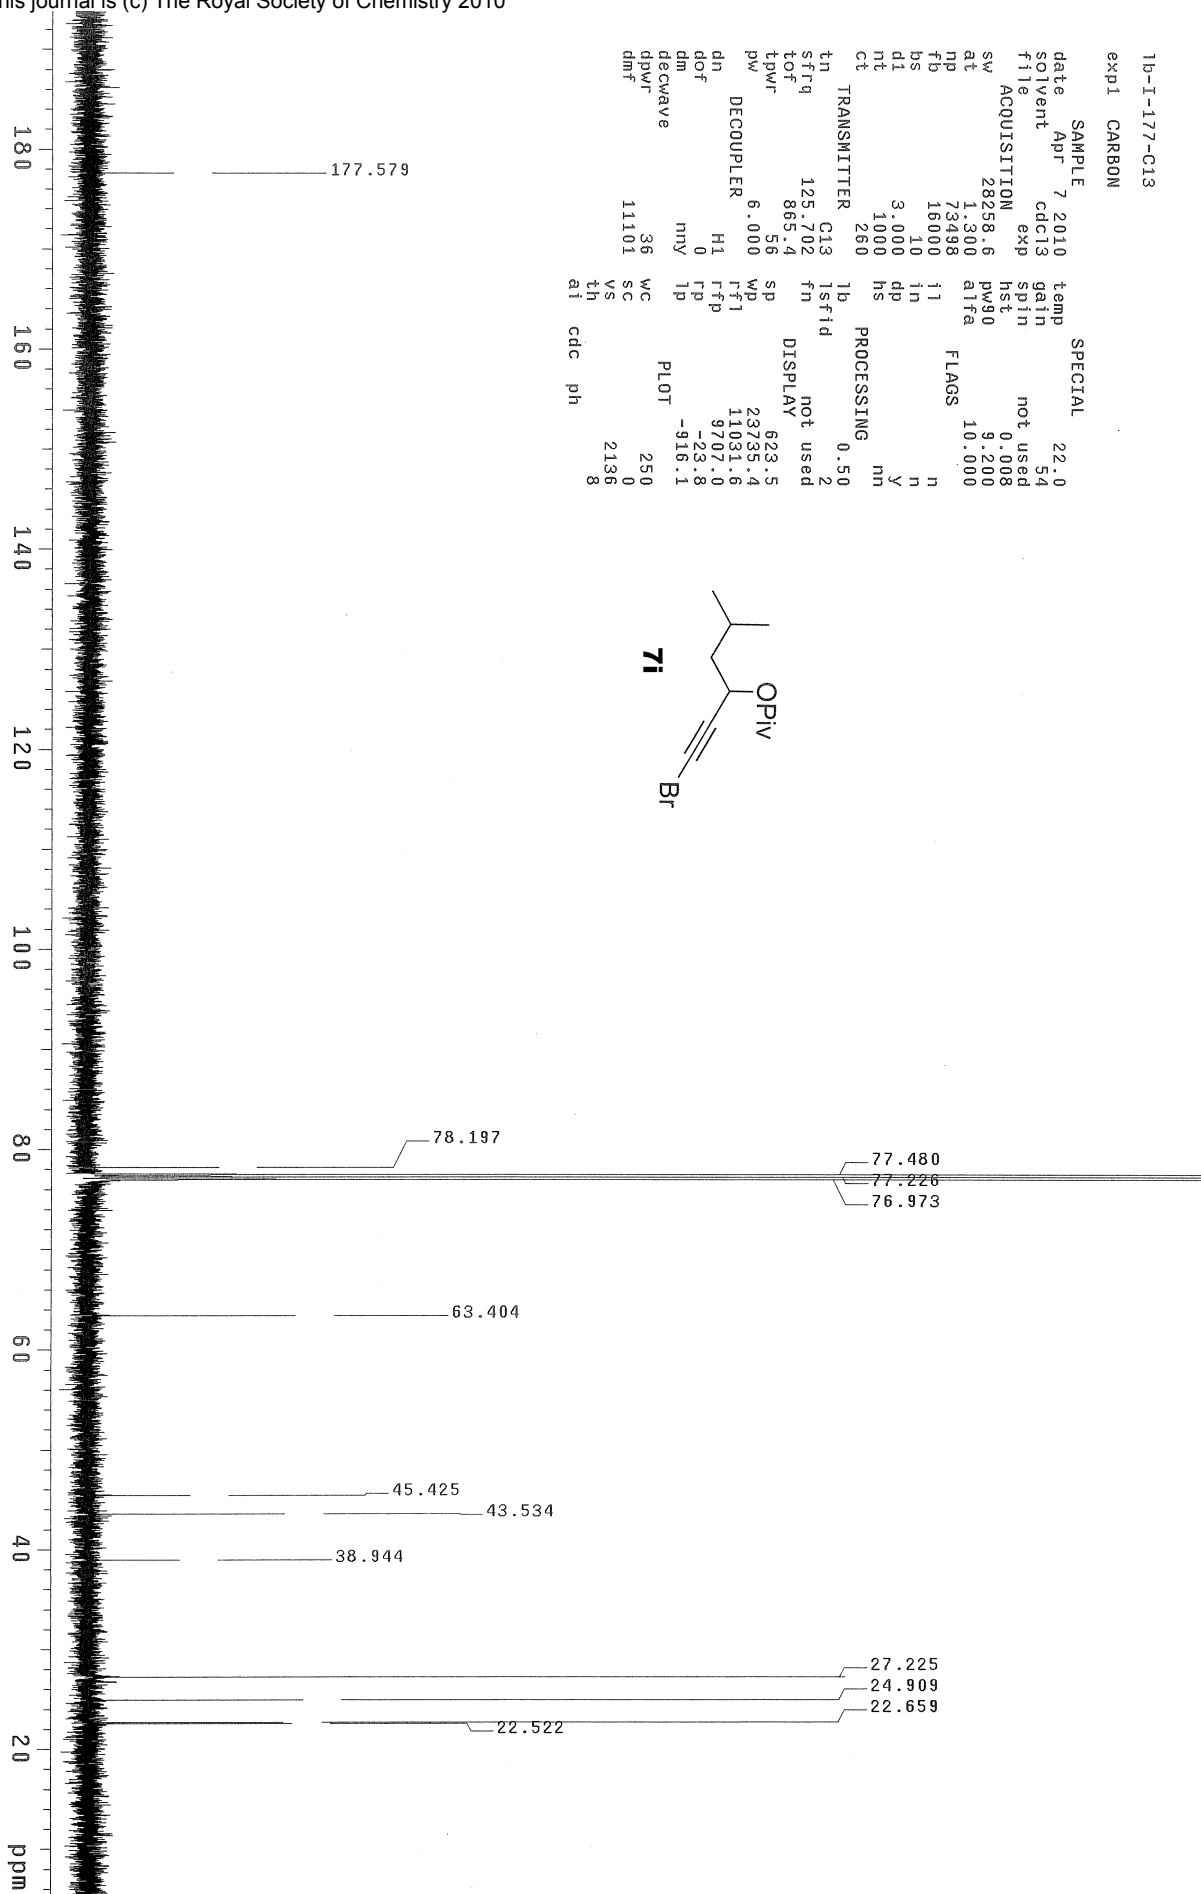



new experiment  
exp2 s2pul

|                     |                |            |        |
|---------------------|----------------|------------|--------|
| SAMPLE              |                | DEC. & VT  |        |
| date                | Jul 28 2010    | dn         | F19    |
| solvent             | CDCl3          | dof        | 0      |
| file                | /nmr500/Zhang~ | dm         | nmn    |
| /Yawang/WY28-171-2~ |                | dmf        | C      |
| -sm-h1.fid          |                | dmf        | 200    |
| ACQUISITION         |                | PROCESSING |        |
| sfrq                | 499.859        | lb         | 0.10   |
| tn                  | H1             | fn         | 32768  |
| at                  | 2.700          | math       | 1      |
| np                  | 43200          | weff       |        |
| sw                  | 8000.0         | wexp       |        |
| fb                  | 4000           | wds        |        |
| bs                  | 4              | wnt        |        |
| pw                  | 9.0            | sp         | -0.4   |
| tpwr                | 57             | wp         | 4498.5 |
| d1                  | 1.000          | vs         | 44     |
| tof                 | 0              | sc         | 0      |
| nt                  | 512            | wc         | 250    |
| ct                  | 41             | hzm        | 17.99  |
| alock               | n              | is         | 175.68 |
| gain                | not used       | rfl        | 5133.8 |
| FLAGS               |                | rfp        | 3629.0 |
| il                  | n              | th         | 4      |
| in                  | y              | ins        | 3.000  |
| dp                  |                |            |        |
| hs                  |                | ph         |        |

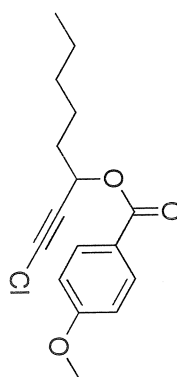

**7j**

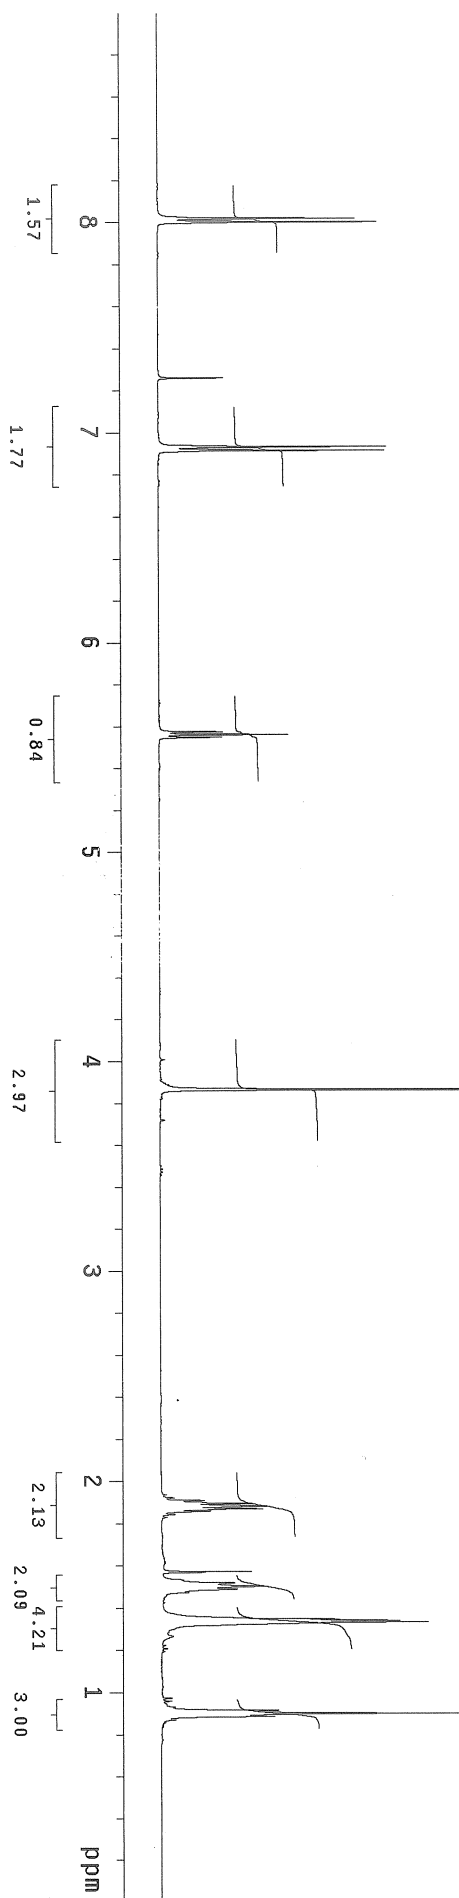

# STANDARD CARBON PARAMETERS

exp1 CARBON

| SAMPLE      |                    | SPECIAL         |          |
|-------------|--------------------|-----------------|----------|
| date        | Jul 28 2010        | temp            | not used |
| solvent     | cdcl3              | gain            | 54       |
| file        | /nmr500/Zhang      | spin            | not used |
|             | /Yawang/WY22-171-2 | hst             | 0.008    |
|             | -sm-c13.fid        | pw90            | 9.200    |
| ACQUISITION |                    | atfa            | 10.000   |
| sw          | 28258.6            | flags           |          |
| at          | 1.300              | il              | n        |
| np          | 73498              | in              | n        |
| fb          | 16000              | dp              | y        |
| bs          | 4                  | hs              | nn       |
| di          | 3.000              | PROCESSING 0.50 |          |
| nt          | 1e+06              | lb              | 2        |
| ct          | 206                | lsfid           | not used |
| TRANSMITTER |                    | fn              |          |
| tn          | C13                | display         | not used |
| sfrq        | 125.702            | sp              | -669.6   |
| lof         | 865.4              | wp              | 24516.3  |
| tpwr        | 56                 | rfl             | 11031.1  |
| pw          | 6.000              | rffp            | 9707.0   |
| DECOUPLER   |                    | tp              | 163.6    |
| dn          | H1                 | ip              | -909.4   |
| dof         | 0                  | PLOT            |          |
| dm          | nny                | wc              | 250      |
| decwave     | 36                 | sc              | 0        |
| dpwr        | 11101              | vs              | 1264     |
| dmf         |                    | th              | 9        |
|             |                    | at              | cdc ph   |

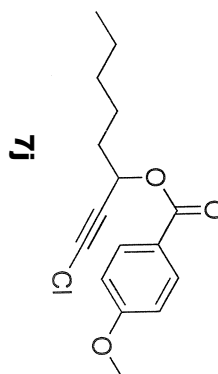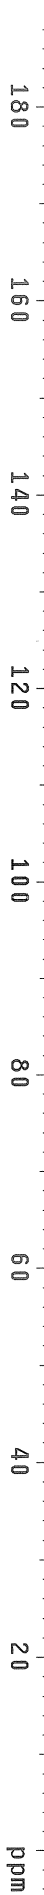

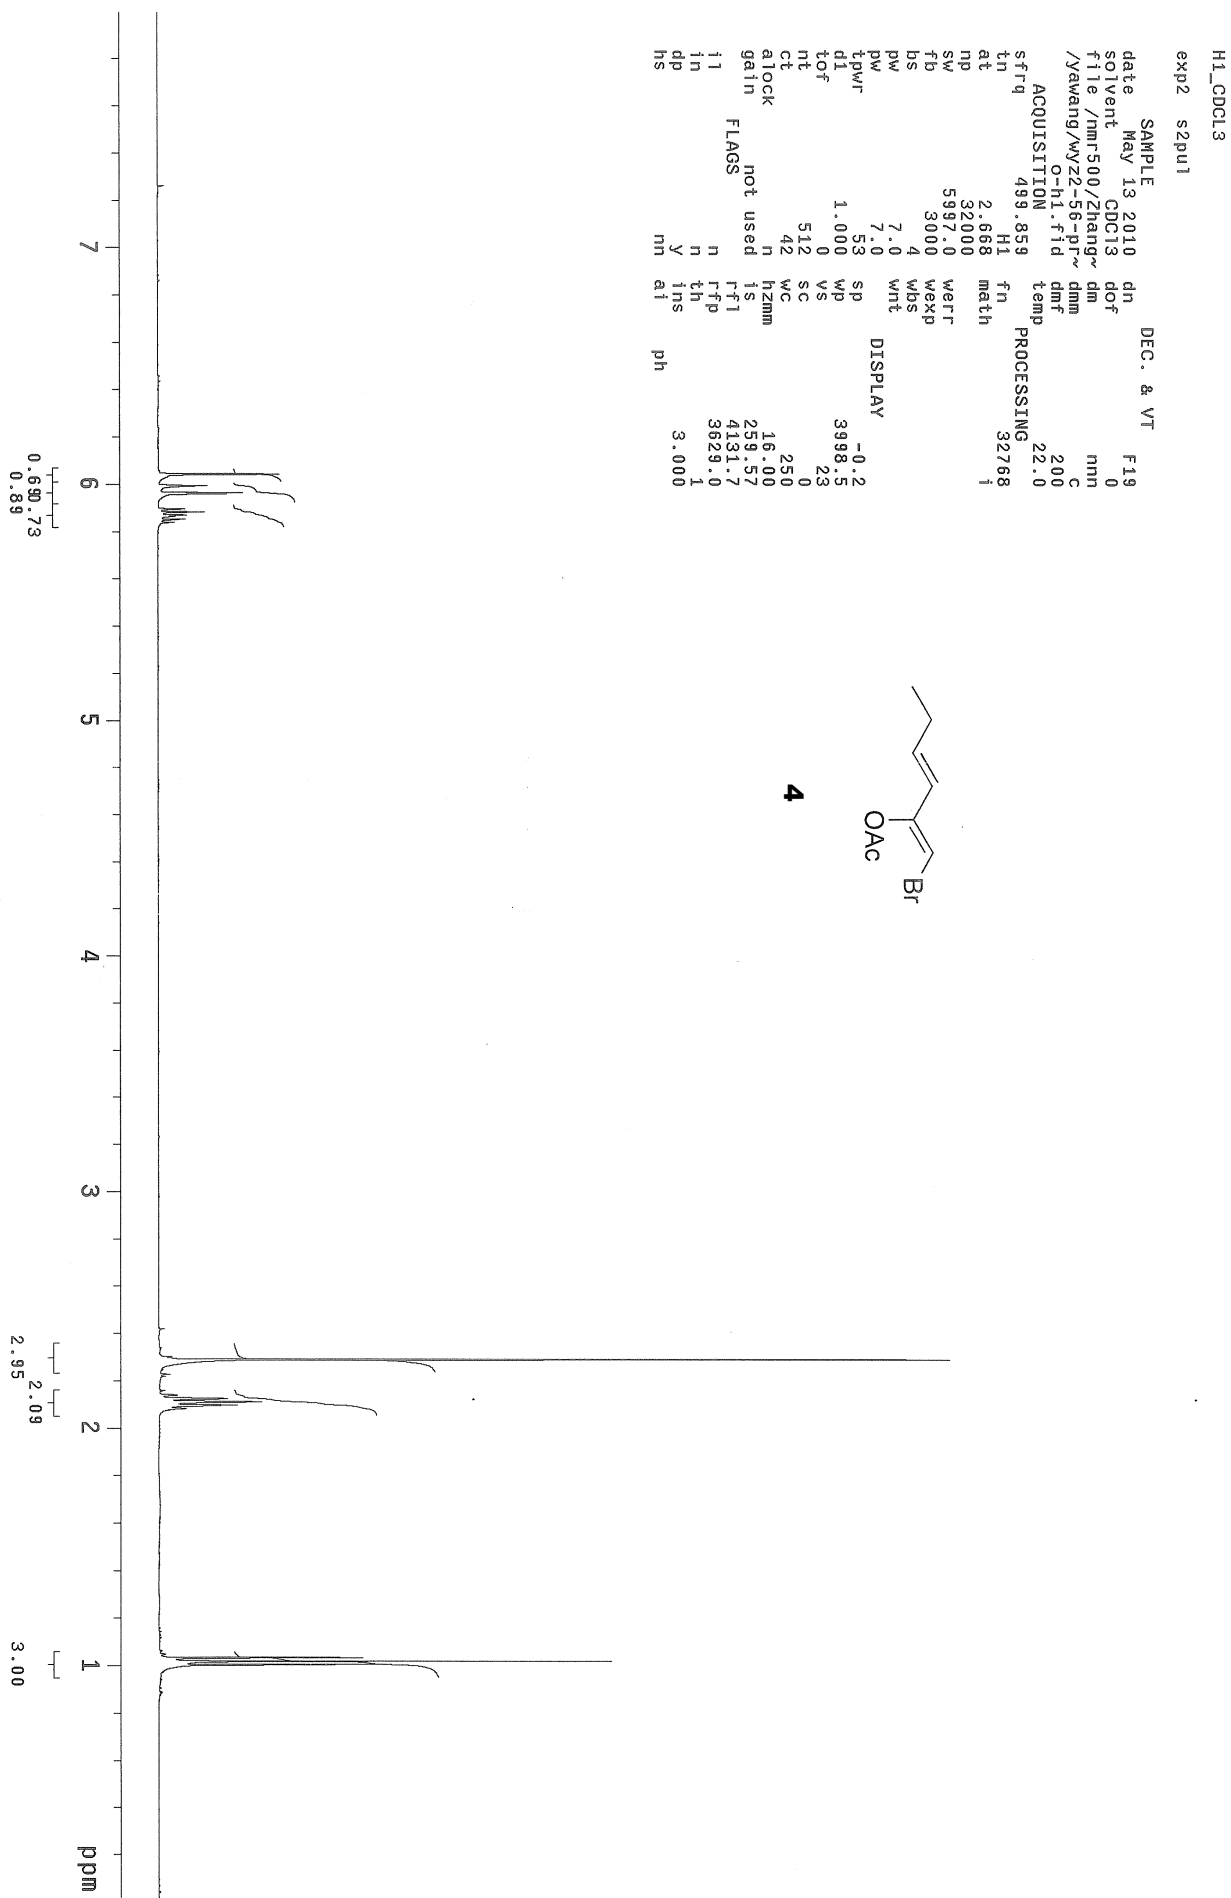

# STANDARD CARBON PARAMETERS

exp1 CARBON

| SAMPLE      |                     | SPECIAL         |          |
|-------------|---------------------|-----------------|----------|
| date        | May 13 2010         | temp            | 22.0     |
| solvent     | cdcl3               | gain            | 54       |
| file        | /nmr500/Zhang~      | spin            | not used |
|             | /yawang/wyz2-56-pr~ | hst             | 0.008    |
|             | o-cl3.fid           | pw90            | 9.200    |
|             |                     | alpha           | 10.000   |
| ACQUISITION |                     | FLAGS           |          |
| sw          | 28258.6             | il              | n        |
| at          | 1.300               | in              | n        |
| np          | 73498               | dp              | y        |
| fb          | 16000               | hs              | n        |
| bs          | 4                   | PROCESSING 0.50 |          |
| d1          | 3.000               | lb              | 2        |
| nt          | 1e+06               | lsfid           | not used |
| ct          | 194                 | fn              | not used |
| TRANSMITTER |                     | DISPLAY         |          |
| tn          | C13                 | sp              | -1324.2  |
| sfrq        | 125.702             | wd              | 28258.1  |
| tof         | 865.4               | rfl             | 11031.6  |
| tpwr        | 56                  | rffp            | 9707.0   |
| pw          | 6.000               | rfp             | -28.2    |
| DECOUPLER   |                     | PLOT            |          |
| dn          | H1                  | tp              | -885.4   |
| dof         | 0                   | wc              | 250      |
| dm          | nny                 | sc              | 0        |
| decwave     | 36                  | vs              | 791      |
| dpwr        | 11101               | th              | 12       |
| dmf         |                     | at              | cdc ph   |

4

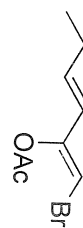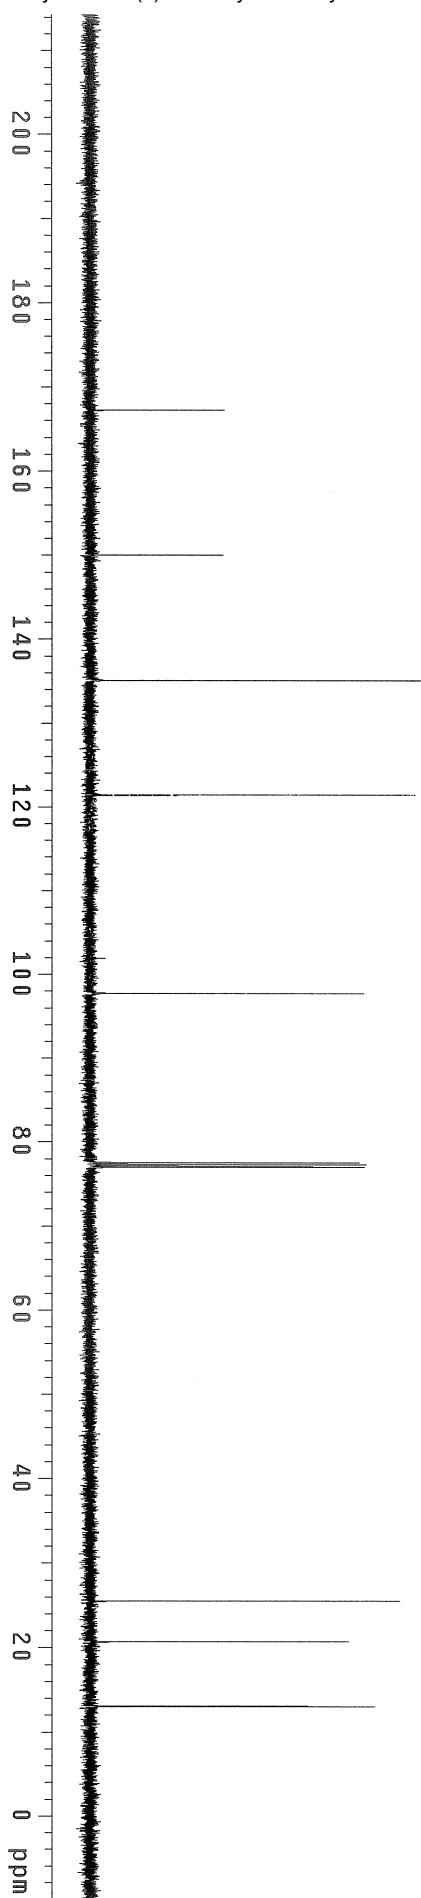

H1\_CDCL3  
exp2 szpu1

SAMPLE

DEC. & VT

F19

date Apr 15 2010  
solvent CDCl3  
file /nmr500/Zhang~  
/yewang/wy22-58-pr~

dmf  
dmf  
dmf

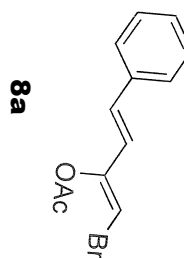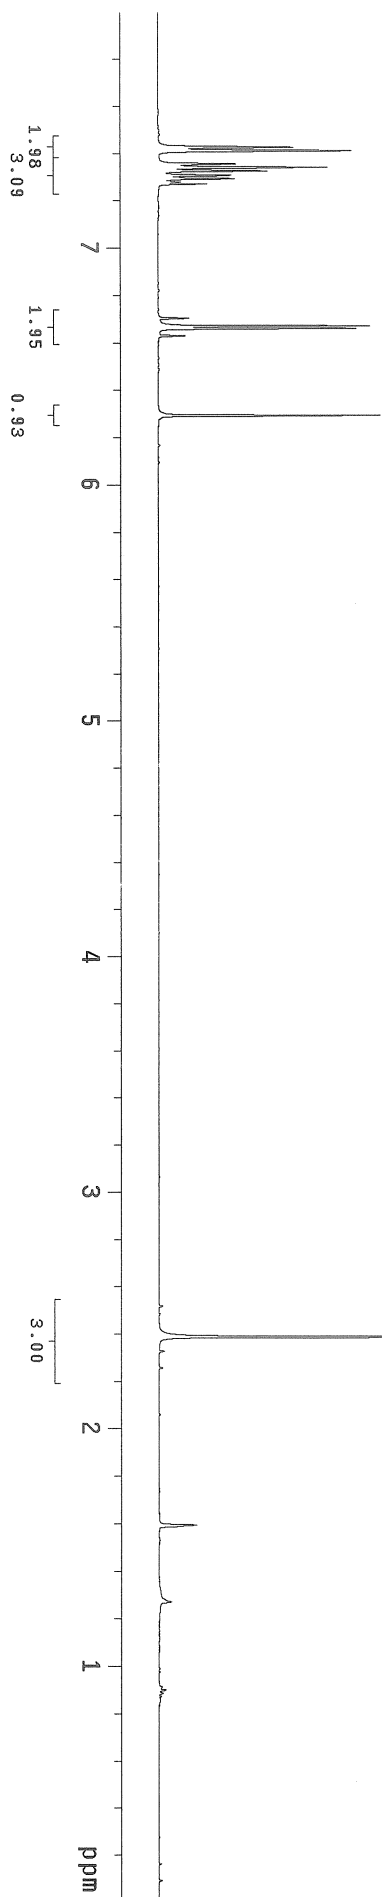

STANDARD CARBON PARAMETERS

exptl CARBON

|                     |                |            |          |
|---------------------|----------------|------------|----------|
| SAMPLE              |                | SPECIAL    |          |
| date                | Apr 9 2010     | temp       | 22.0     |
| solvent             | CdCl3          | gain       | 54       |
| file                | /nmr500/Zhang~ | spin       | not used |
| /Yawang/WY22-59-pr~ | hst            | 0.008      |          |
| O-C13.fid           | pw90           | 9.200      |          |
| ACQUISITION         | alfa           | 10.000     |          |
| sw                  | 28258.6        | FLAGS      |          |
| at                  | 1.300          | il         | n        |
| np                  | 73498          | in         | n        |
| fb                  | 16000          | dp         | y        |
| bs                  | 4              | hs         | nn       |
| d1                  | 3.000          | PROCESSING |          |
| nt                  | 1e+06          | lb         | 0.50     |
| ct                  | 198            | lsfid      | 2        |
| TRANSMITTER         | fn             | not used   |          |
| tn                  | C13            | DISPLAY    |          |
| sfrq                | 125.702        | sp         | -491.6   |
| tof                 | 865.4          | wp         | 23940.6  |
| tpwr                | 56             | rfl        | 11035.9  |
| pw                  | 6.000          | rtp        | 9707.0   |
| DECOUPLER           | rtp            | -39.9      |          |
| dn                  | H1             | tp         | -912.6   |
| dof                 | 0              | PLOT       |          |
| dm                  | my             | wc         | 250      |
| decwave             | sc             | vs         | 0        |
| dpwr                | 36             | th         | 1339     |
| dmf                 | 11101          | at         | 7        |
|                     |                | cdc        | ph       |

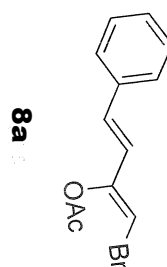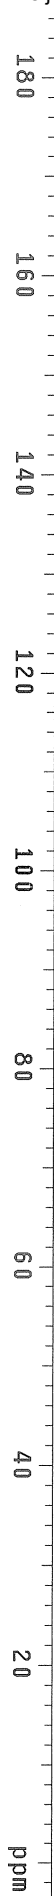

1b-I-140

exp1 PROTON

|             |             |               |          |
|-------------|-------------|---------------|----------|
| SAMPLE      |             | PRESATURATION |          |
| date        | Mar 17 2010 | satmode       | n        |
| solvent     | CDCl3       | wet           | n        |
| file        | exp         | SPECIAL       |          |
| ACQUISITION |             | temp          | 22.0     |
| sw          | 7997.6      | gain          | not used |
| at          | 2.049       | spin          | 20       |
| np          | 32768       | bst           | 0.008    |
| fb          | 4000        | pw90          | 9.100    |
| bs          | 2           | altfa         | 6.600    |
| d1          | 1.000       | FLAGS         |          |
| nt          | 8           | i1            | n        |
| ct          | 8           | in            | n        |
| TRANSMITTER |             | dp            | y        |
| tn          | h1          | hs            | nn       |
| sfrq        | 499.859     | fn            | not used |
| tof         | 499.9       | DISPLAY       |          |
| tpwr        | 53          | sp            | 58.7     |
| DECOUPLER   |             | wp            | 4213.6   |
| dn          | C13         | rfl           | 4631.9   |
| dof         | 0           | rfp           | 3629.0   |
| dm          | nnn         | rp            | -38.1    |
| decwave     | W40_5mm3G1~ | tp            | 4.3      |
| PLOT        |             |               |          |
| dpwr        | 47          | WC            | 250      |
| dmf         | 32258       | SC            | 0        |
|             | vs          | th            | 98       |
|             | nm          | cdc           | ph       |

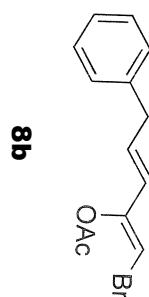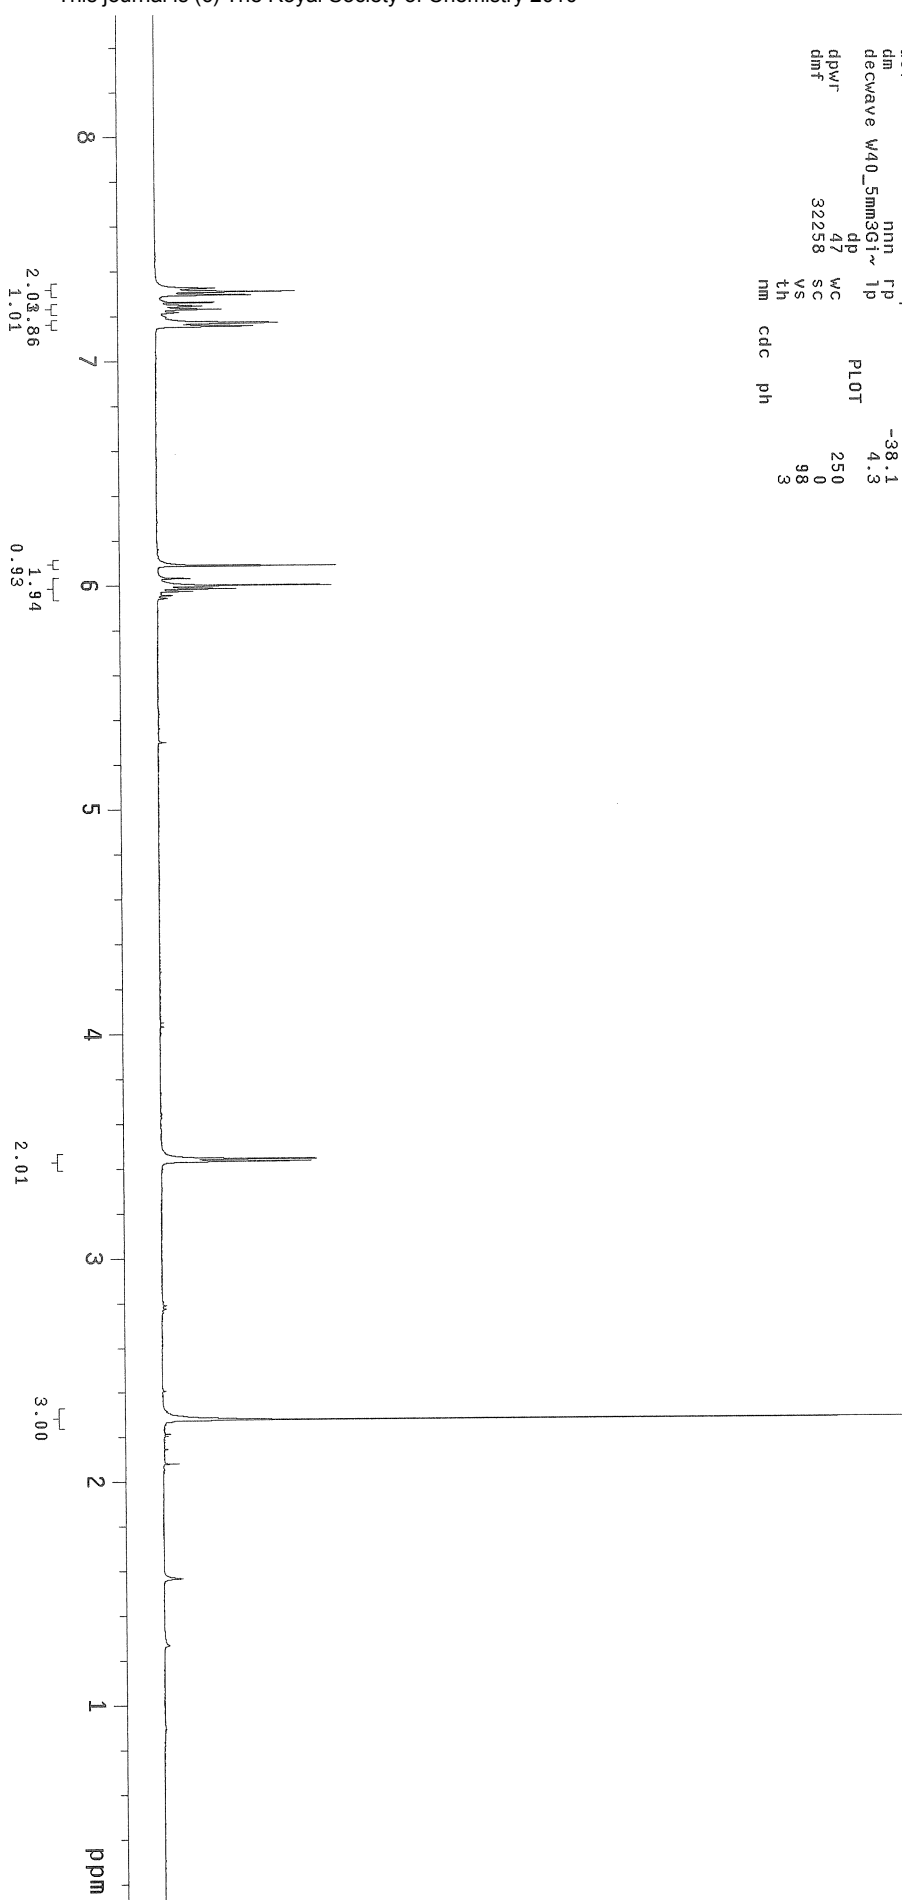

1b-I-140-C13  
exp1 CARBON

|             |             |            |          |
|-------------|-------------|------------|----------|
| SAMPLE      |             | SPECIAL    |          |
| date        | Mar 17 2010 | temp       | 22.0     |
| solvent     | cdcl3       | gain       | 54       |
| file        | exp         | spin       | 20       |
| ACQUISITION |             | hst        | 0.008    |
| sw          | 28258.6     | pw90       | 9.200    |
| at          | 1.300       | alpha      | 10.000   |
| np          | 73498       | flags      | n        |
| fb          | 16000       |            | n        |
| bs          | 4           |            | y        |
| di          | 3.000       | dp         | nm       |
| nt          | 1000        | hs         | nm       |
| ct          | 104         |            |          |
| TRANSMITTER |             | PROCESSING |          |
| tn          | C13         | lb         | 0.50     |
| sfreq       | 125.702     | isfid      | 2        |
| tof         | 865.4       | fn         | not used |
| tpwr        | 36          | DISPLAY    |          |
| pw          | 6.000       | sp         | 677.4    |
| DECOUPLER   |             | wp         | 22205.1  |
| dn          | H1          | rf1        | 11035.1  |
| dof         | 0           | rfp        | 9707.0   |
| dm          | nny         | lp         | -952.5   |
| decwave     |             | PLOT       |          |
| dpwr        | 36          | wc         | 250      |
| dmf         | 11101       | sc         | 0        |
|             |             | vs         | 412      |
|             |             | th         | 4        |
|             |             | ai         | cdc ph   |

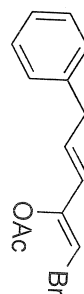

**8b**

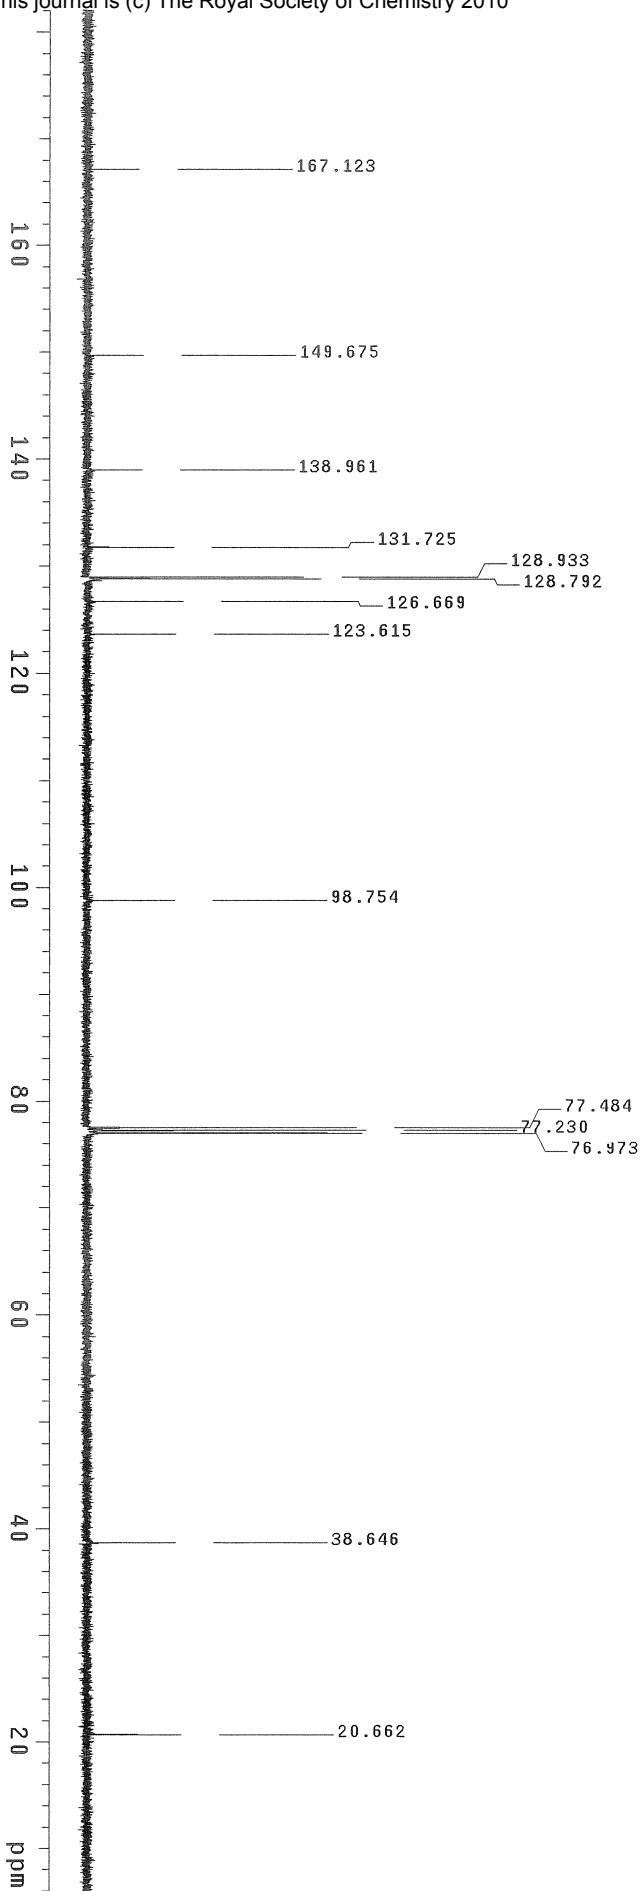



1b-I-141

exp1 PROTON

|             |             |               |          |
|-------------|-------------|---------------|----------|
| SAMPLE      |             | PRESATURATION |          |
| date        | Mar 17 2010 | satmode       | n        |
| solvent     | CDCl3       | wet           | n        |
| file        | exp         | SPECIAL       | n        |
| ACQUISITION |             | temp          | 22.0     |
| sw          | 7997.6      | gain          | not used |
| at          | 2.049       | spin          | 20       |
| np          | 32768       | hst           | 0.008    |
| fb          | 4000        | pw90          | 9.100    |
| bs          | 4           | atfa          | 6.600    |
| d1          | 1.000       | FLAGS         |          |
| nt          | 16          | i1            | n        |
| ct          | 16          | in            | n        |
| TRANSMITTER |             | dp            | y        |
| tn          | H1          | hs            | nm       |
| sffq        | 499.859     | fn            | not used |
| tof         | 499.9       | DISPLAY       | 79.7     |
| tpwr        | 53          | sp            | 4266.3   |
| pw          | 4.550       | wp            | 4631.9   |
| dn          | C13         | rfl           | 3629.0   |
| dof         | 0           | rfp           | -39.8    |
| din         | nm          | lp            | -3.4     |
| decwave     | W40_5mm3Gi~ | PLOT          |          |
| dpwr        | 47          | WC            | 250      |
| dmf         | 32258       | SC            | 0        |
|             | th          | VS            | 50       |
|             | nm          | cdc           | ph       |
|             |             |               | 1        |

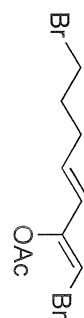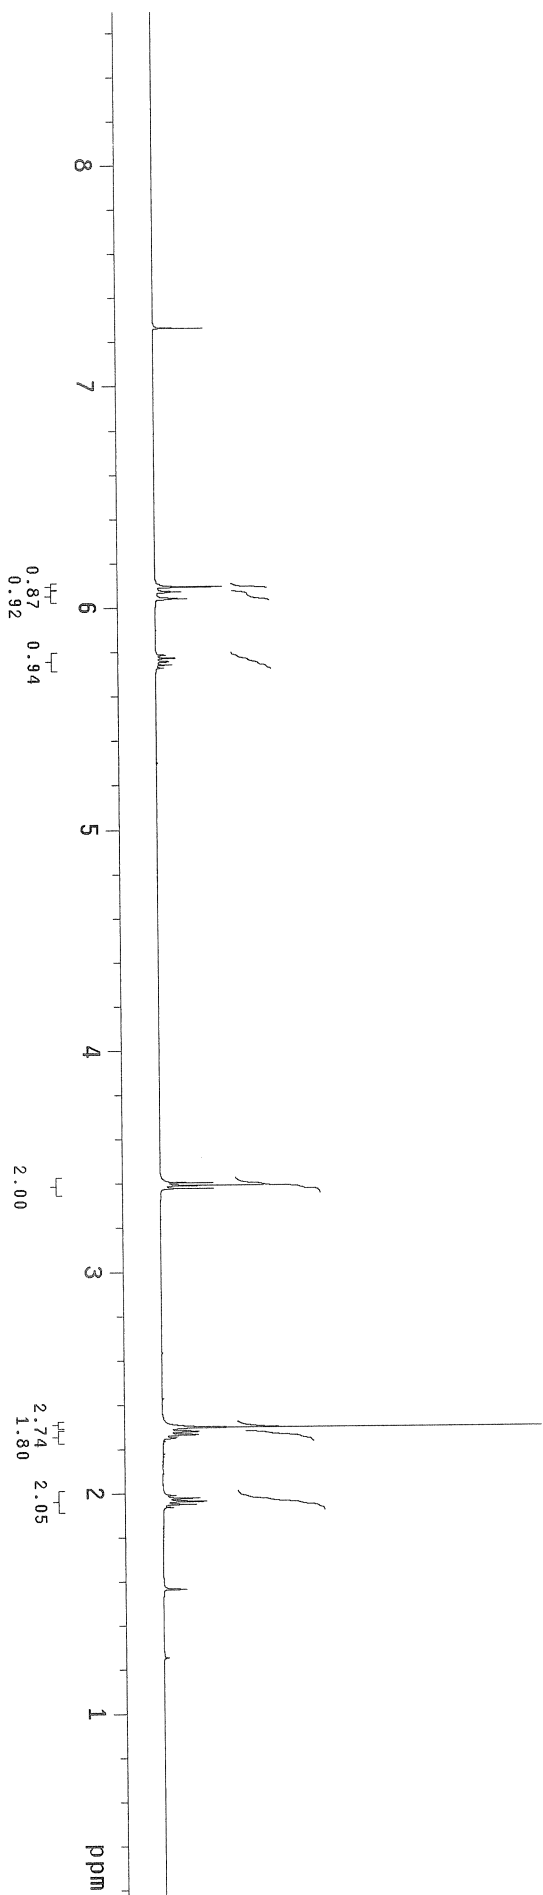

1b-I-141-C13  
exp1 CARBON

|             |             |            |          |
|-------------|-------------|------------|----------|
| SAMPLE      |             | SPECIAL    |          |
| date        | Mar 17 2010 | temp       | 22.0     |
| solvent     | cdcl3       | gain       | 54       |
| file        | exp         | spin       | 20       |
| ACQUISITION |             | hst        | 0.008    |
| sw          | 28258.6     | pw90       | 9.200    |
| at          | 1.300       | aifa       | 10.000   |
| np          | 73498       | FLAGS      |          |
| fb          | 16000       | in         | n        |
| bs          | 4           | dp         | y        |
| di          | 3.000       | hs         | nn       |
| nt          | 1000        | PROCESSING |          |
| ct          | 500         | lb         | 0.50     |
| TRANSMITTER |             | tsfid      | 2        |
| tn          | C13         | fn         | not used |
| sfrq        | 125.702     | DISPLAY    |          |
| tof         | 865.4       | sp         | 1014.1   |
| tpwr        | 56          | wp         | 22056.7  |
| DECOUPLER   |             | rff1       | 11032.5  |
| dn          | H1          | rffp       | 9707.0   |
| dof         | 0           | 1p         | 1.6      |
| dm          | ny          | PLOT       |          |
| decwave     |             |            | -942.3   |
| dprf        | 36          | WC         | 250      |
| dmf         | 11101       | SC         | 0        |
|             |             | VS         | 1117     |
|             |             | th         | 4        |
|             |             | ai         | cdc ph   |

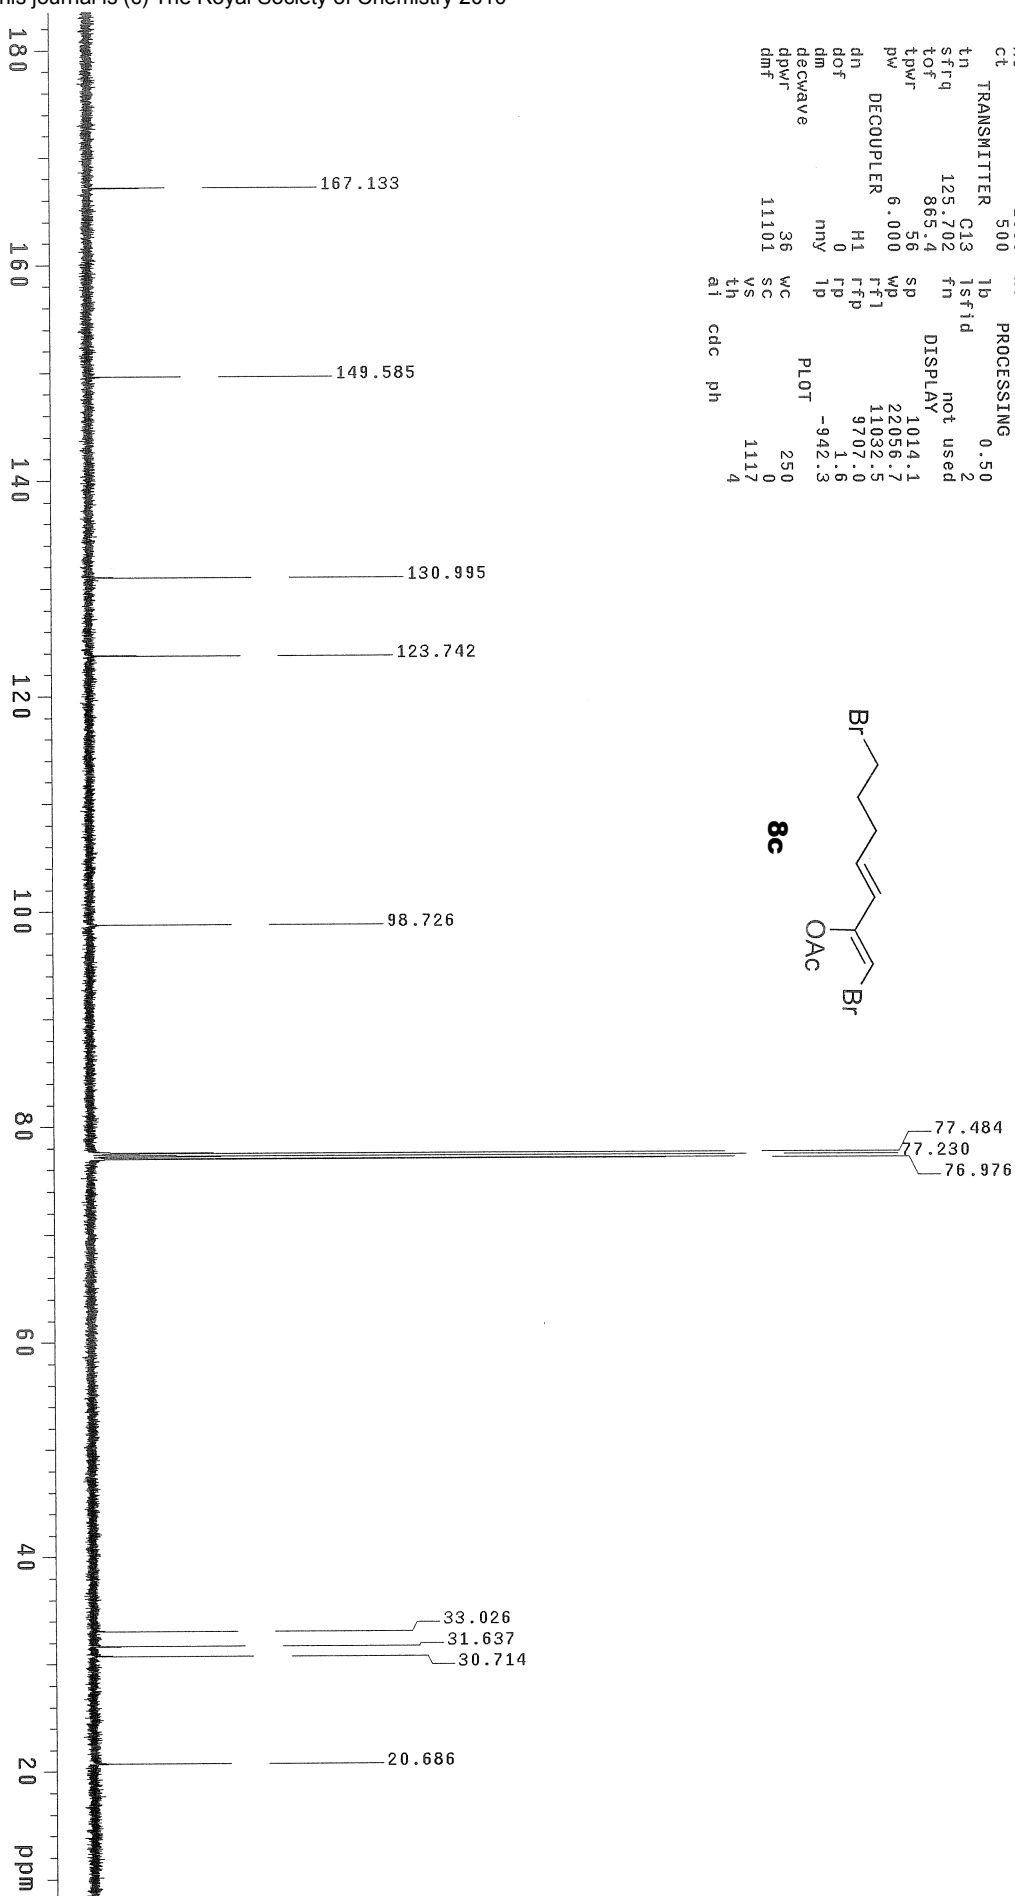

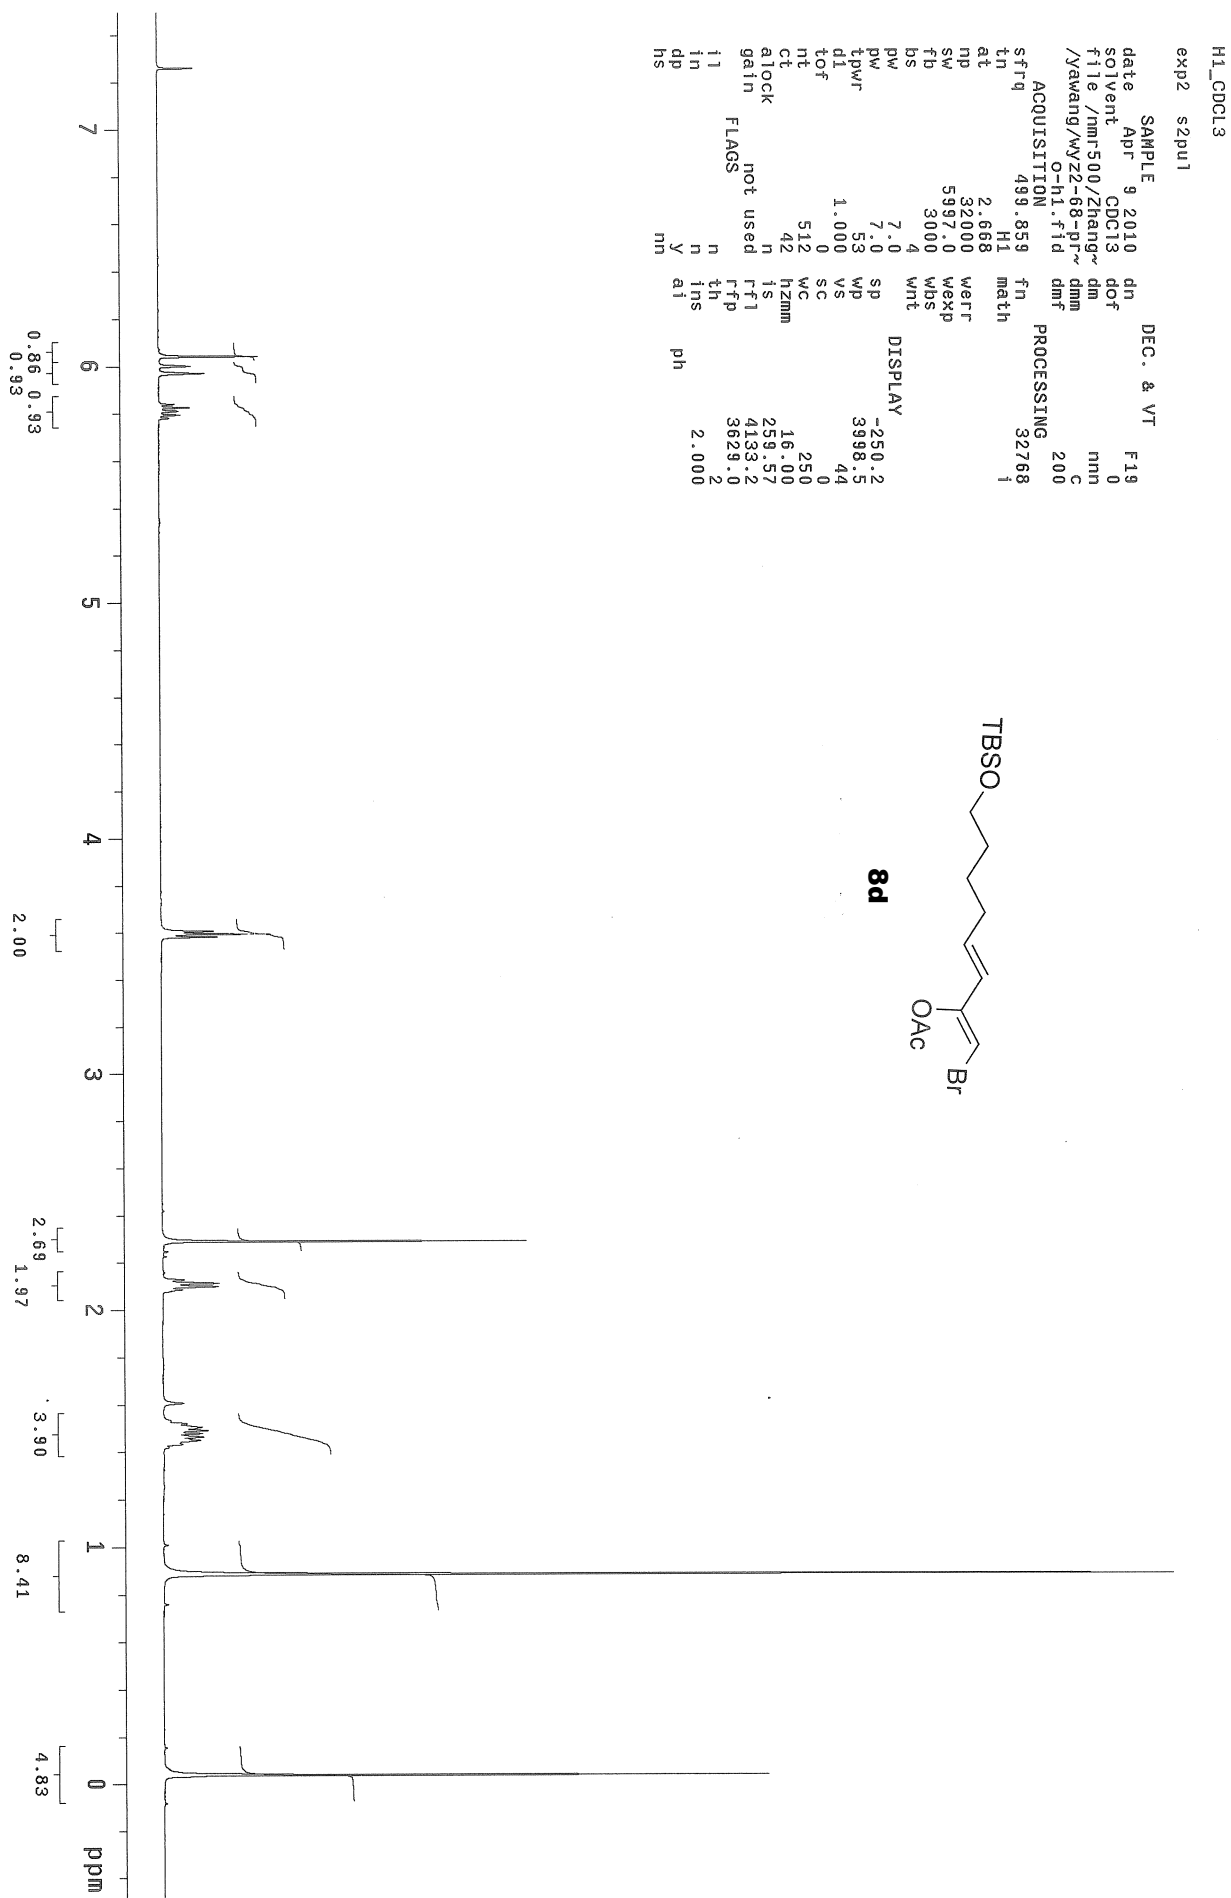

STANDARD CARBON PARAMETERS

expl CARBON

| SAMPLE              |                | SPECIAL         |          |
|---------------------|----------------|-----------------|----------|
| date                | Apr 9 2010     | temp            | 22.0     |
| solvent             | cdcl3          | gain            | 54       |
| file                | /mmr500/Zhang* | spn             | not used |
| /yawang/mvz2-68-pr* | hst            | pw90            | 0.008    |
| o-c13.fid           | alifa          | 10.000          |          |
| ACQUISITION         |                |                 |          |
| sw                  | 28258.6        | flags           | 10.000   |
| at                  | 1.300          | in              | n        |
| np                  | 73498          | in              | n        |
| fb                  | 16000          | dp              | y        |
| bs                  | 4              | hs              | nn       |
| d1                  | 3.000          | PROCESSING 0.50 |          |
| nt                  | 1e+06          | lp              | 0.50     |
| ct                  | 274            | lsfid           | 2        |
| TRANSMITTER         |                |                 |          |
| tn                  | C13            | fn              | not used |
| sfrq                | 125.702        | sp              | -1299.2  |
| tof                 | 865.4          | wp              | 24673.2  |
| tpwr                | 56             | rfi             | 11032.5  |
| pw                  | 6.000          | rfp             | 9707.0   |
| DECOUPLER           |                |                 |          |
| dn                  | H1             | tp              | -27.6    |
| dof                 | 0              | tp              | -913.5   |
| dm                  | ny             | WC              | 250      |
| decwave             | 36             | SC              | 0        |
| dpwr                | 11101          | VS              | 1609     |
| dmf                 |                | tn              | 10       |
|                     |                | at              | cdc      |
|                     |                |                 | ph       |

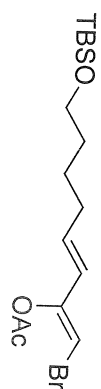

8d

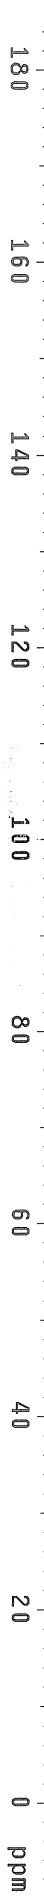

H1\_CDCL3  
exp2 s2pul

|                     |                |            |        |
|---------------------|----------------|------------|--------|
| SAMPLE              |                | DEC. & VT  |        |
| date                | Jun 1 2010     | dn         | F19    |
| solvent             | CDCl3          | dof        | 0      |
| file                | /nmr500/Zhang~ | dm         | nmn    |
| /Yawang/WY22-102-p~ |                | dmf        | C      |
| ro-h1.fid           |                | dmf        | 200    |
| ACQUISITION         |                | temp       | 22.0   |
| sfrq                | 499.859        | PROCESSING |        |
| in                  | H1             |            | 32768  |
| at                  | 2.668          | fn         | 1      |
| np                  | 32000          | math       |        |
| sw                  | 5997.0         | weir       |        |
| fb                  | 3000           | wexp       |        |
| bs                  | 4              | wbs        |        |
| pw                  | 7.0            | wnt        |        |
| tpwr                | 53             | sp         | -0.2   |
| d1                  | 1.000          | wp         | 3998.5 |
| nt                  | 0              | vs         | 47     |
| ct                  | 512            | sc         | 0      |
| atlock              | 61             | WC         | 250    |
| gain                | not used       | hzm        | 16.00  |
| FLAGS               |                | is         | 259.57 |
| 11                  | n              | rfl        | 4131.7 |
| in                  | n              | rtp        | 3629.0 |
| dp                  | y              | ins        | 2      |
| hs                  | nm             | ai         | ph     |
|                     |                |            | 2.000  |

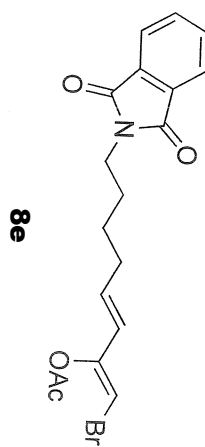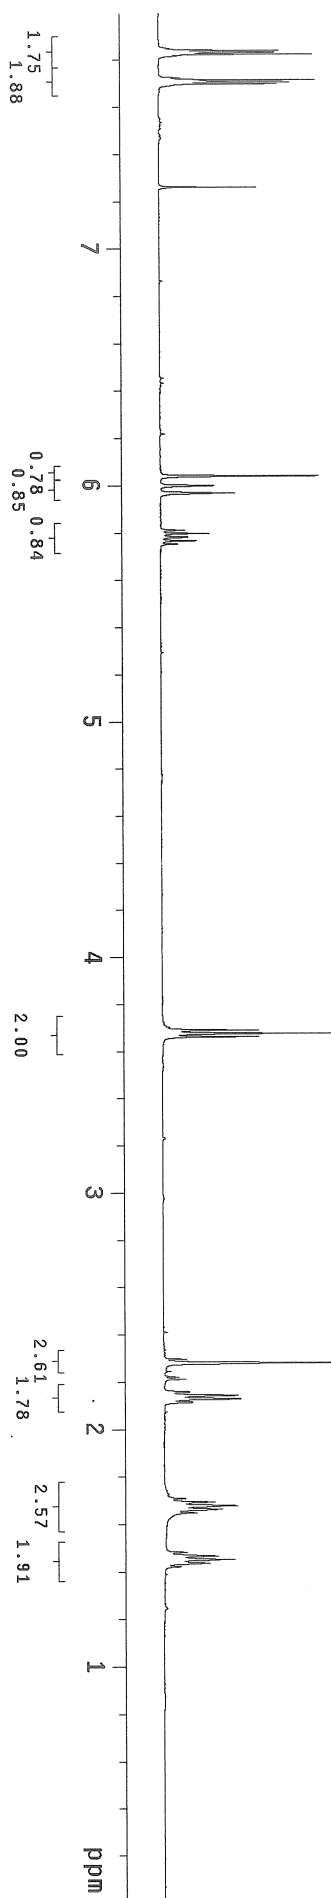

STANDARD CARBON PARAMETERS

expt1 CARBON

| SAMPLE      |                     | SPECIAL         |          |
|-------------|---------------------|-----------------|----------|
| date        | Jun 1 2010          | temp            | 22.0     |
| solvent     | cdcl3               | gain            | 54       |
| file        | /mmr500/Zhang*/     | sp in           | not used |
|             | /Yawang/WY22-102-P* | hs t            | 0.008    |
|             | PC-13.fid           | pw90            | 9.200    |
|             |                     | al fa           | 10.000   |
| ACQUISITION |                     |                 |          |
| sw          | 28258.6             | flags           |          |
| at          | 1.300               | i1              | n        |
| np          | 73498               | in              | n        |
| fb          | 16000               | dp              | y        |
| bs          | 4                   | hs              | nm       |
| d1          | 3.000               | PROCESSING 0.50 |          |
| nt          | 1e+06               | lb              | 0.50     |
| ct          | 154                 | tsfid           | 2        |
| TRANSMITTER |                     |                 |          |
| tn          | C13                 | fn              | not used |
| sfrq        | 125.702             | DISPLAY         |          |
| tof         | 865.4               | sp              | -672.1   |
| tpwr        | 56                  | wp              | 24621.0  |
|             |                     | rfl             | 11033.6  |
| pw          | 6.000               | rtp             | 9707.0   |
| DECOUPLER   |                     |                 |          |
| dn          | H1                  | tp              | 3.1      |
| dof         | 0                   | PLOT            |          |
| dm          | my                  | wc              | 250      |
| decwave     |                     | sc              | 0        |
| dpwr        | 36                  | vs              | 1627     |
| dmf         | 11101               | tn              | 15       |
|             |                     | cdc             | ph       |

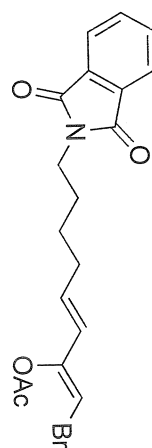

**8e**

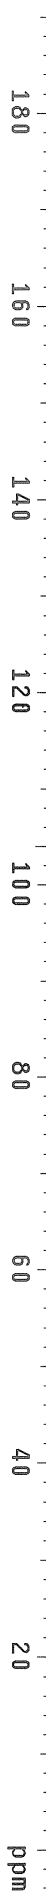

1b-I-165  
exp1 s2pul

|             |             |            |        |
|-------------|-------------|------------|--------|
| SAMPLE      |             | DEC. & VT  |        |
| date        | Mar 26 2010 | dn         | F19    |
| solvent     | CDCl3       | dof        | 0      |
| file        | exp         | dm         | nmn    |
| ACQUISITION |             | dmn        | C      |
| sfrq        | 499.859     | dmf        | 200    |
| tn          | H1          | PROCESSING |        |
| at          | 2.668       | fn         | 32768  |
| np          | 32000       | math       | i      |
| sw          | 5937.0      |            |        |
| fb          | 3000        | werf       |        |
| bs          | 2           | wexp       |        |
| pw          | 7.0         | wbs        |        |
| tnwr        | 7.0         | wnt        |        |
| dl          | 2.000       | sp         | 442.9  |
| tof         | 0           | wp         | 3754.7 |
| nt          | 8           | vs         | 19     |
| ct          | 8           | sc         | 0      |
| atock       | y           | wc         | 250    |
| gain        | not used    | hzm        | 15.02  |
| flags       |             | is         | 73.45  |
| il          | n           | rfl        | 502.9  |
| in          | n           | rfl        | 0      |
| dp          | y           | th         | 3      |
| hs          | nn          | ph         | 2.000  |
| ai          |             |            |        |

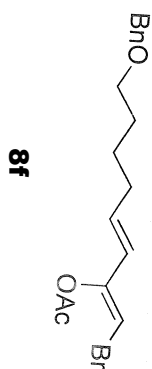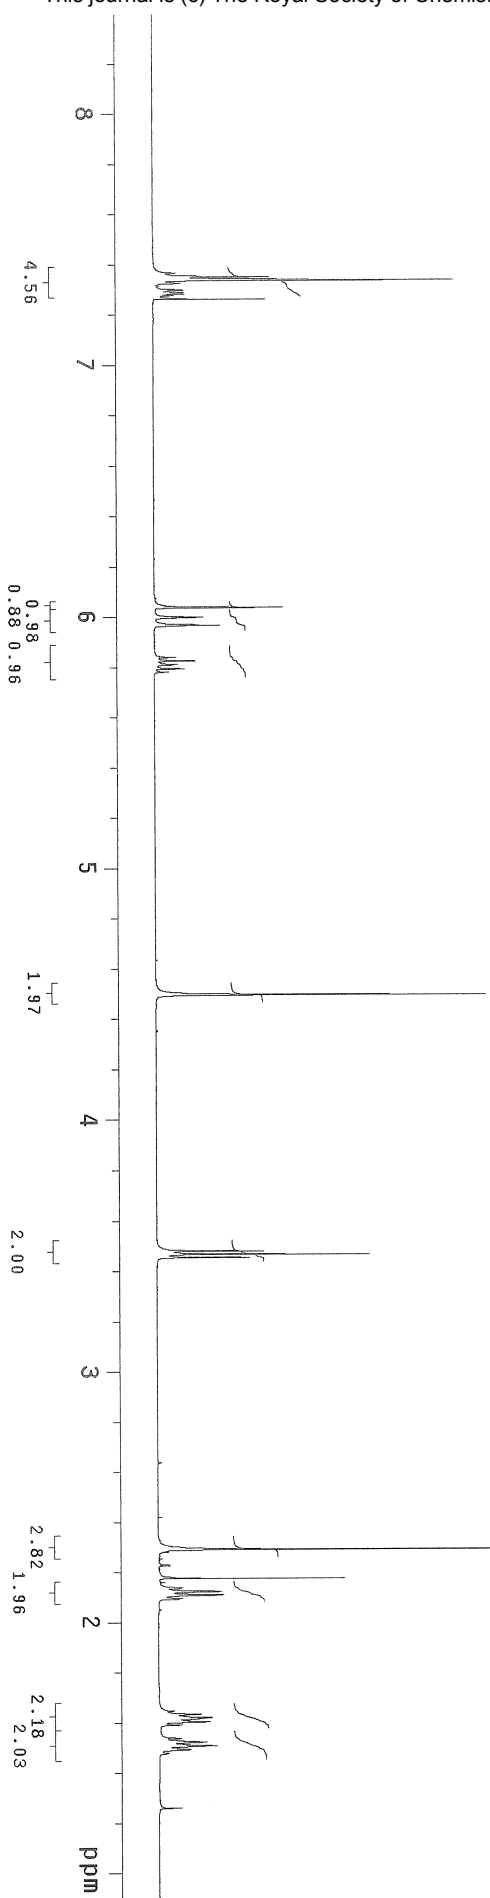

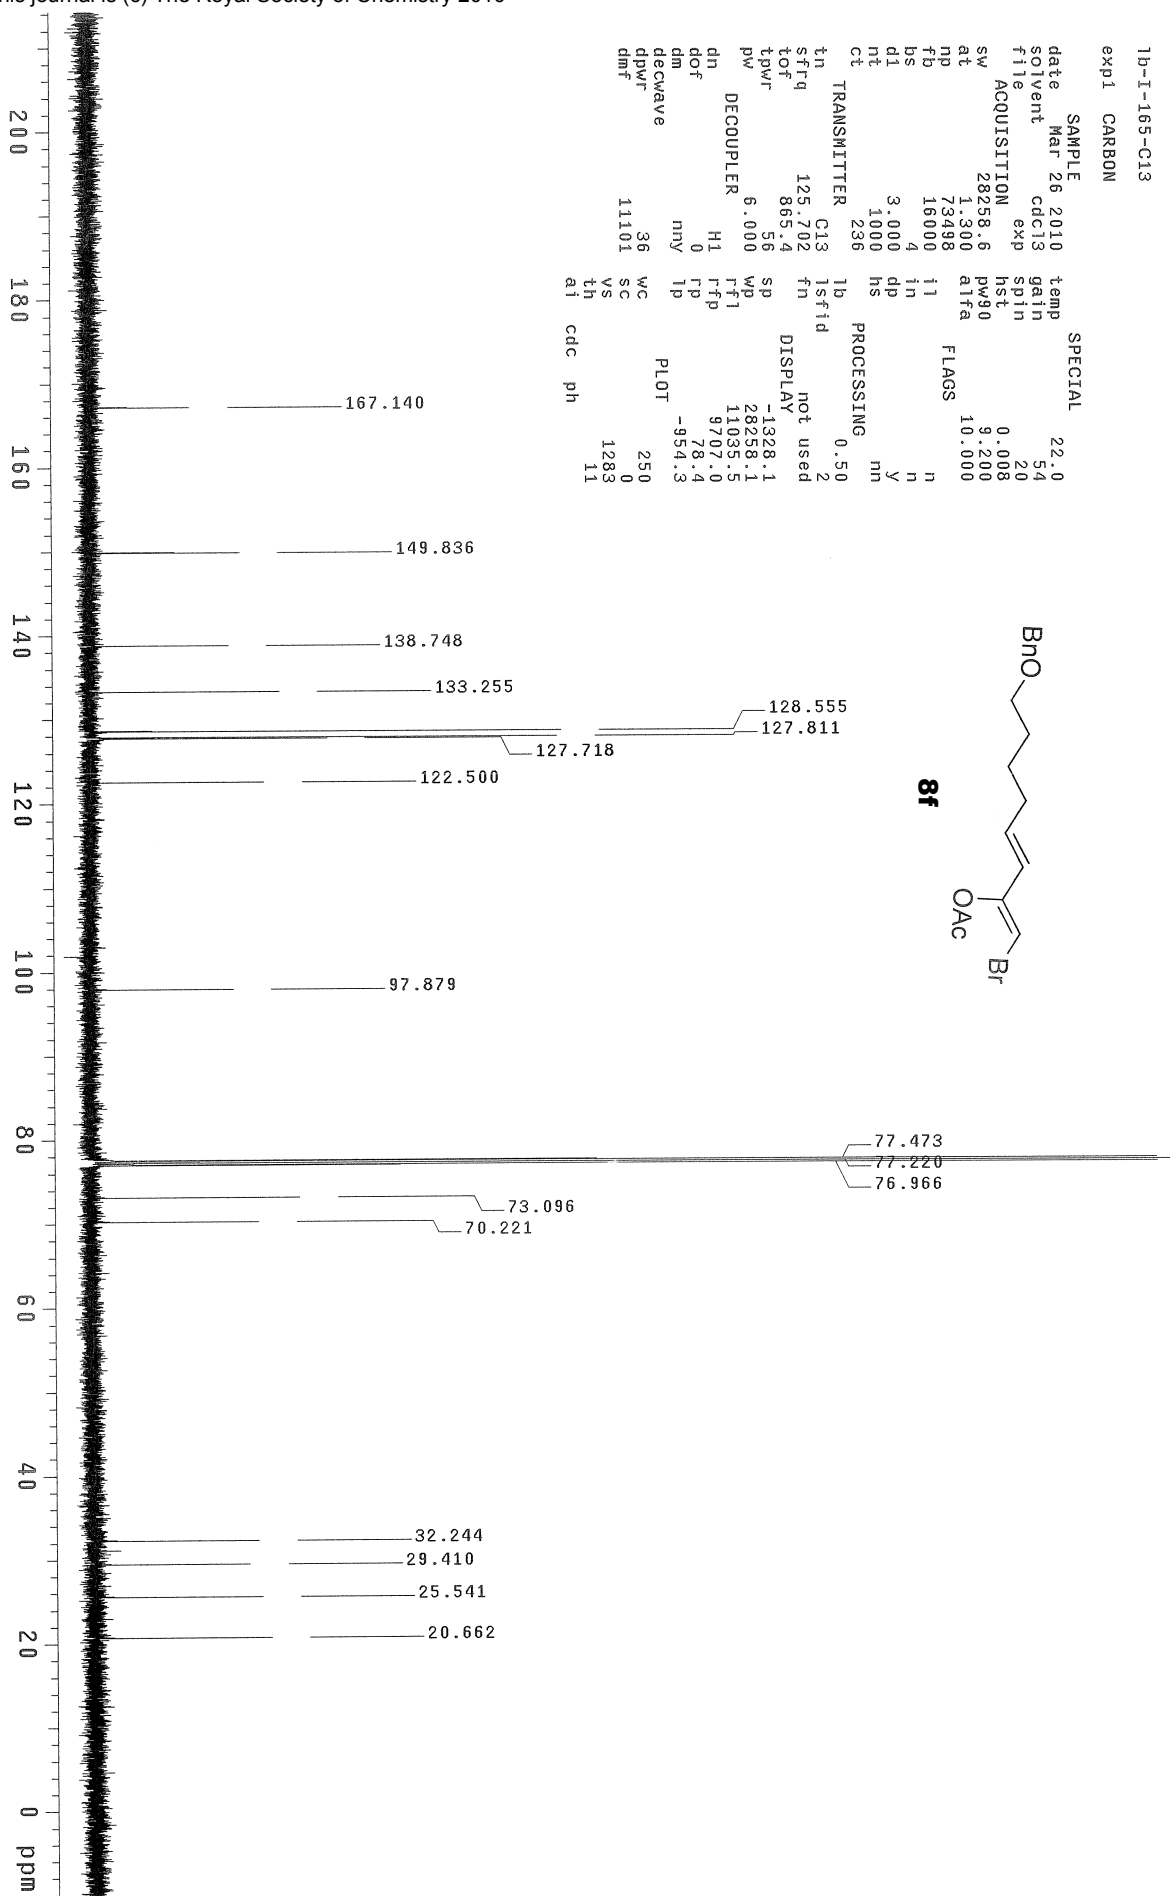



H1\_CDCL3

exp2 s2pul

|             |                                      |            |        |
|-------------|--------------------------------------|------------|--------|
| SAMPLE      |                                      | DEC. & VT  |        |
| date        | Jun 2 2010                           | dn         | F19    |
| solvent     | CDCl3                                | do         | 0      |
| file        | /nmr500/Zhang/<br>Yawang/WY22-104-p* | dm         | nmn    |
| co-h1.fid   |                                      | dmf        | C      |
| ACQUISITION |                                      | temp       | 20.0   |
| sfrq        | 499.859                              | PROCESSING | 22.0   |
| tn          | H1                                   | fn         | 32768  |
| at          | 2.668                                | math       | 1      |
| np          | 32000                                | weff       |        |
| sw          | 5997.0                               | wexp       |        |
| fb          | 3000                                 | wds        |        |
| bs          | 4                                    | wnt        |        |
| pw          | 7.0                                  | sp         | -0.2   |
| tpwr        | 53                                   | wp         | 3998.5 |
| d1          | 1.000                                | vs         | 24     |
| nt          | 512                                  | sc         | 0      |
| ct          | 33                                   | WC         | 250    |
| atlock      | n                                    | h2mm       | 16.90  |
| gain        | not used                             | is         | 259.57 |
| fl          | FLAGS                                | rfl        | 4132.1 |
| in          | n                                    | rflp       | 3629.0 |
| dp          | y                                    | ins        | 48     |
| hs          | nm                                   | ai         | 3.000  |
|             |                                      | ph         |        |

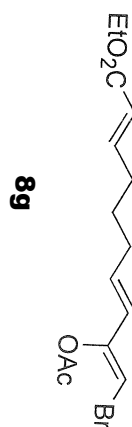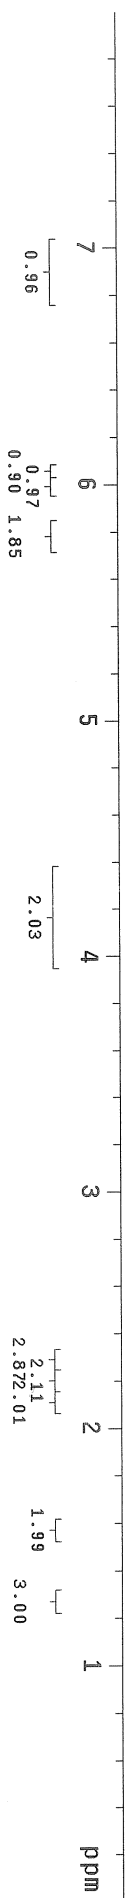

# STANDARD CARBON PARAMETERS

exp1 CARBON

| SAMPLE              |                 | SPECIAL    |          |
|---------------------|-----------------|------------|----------|
| date                | Jun 2 2010      | temp       | 22.0     |
| solvent             | cdcl3           | gain       | 54       |
| file                | /nmr500/Zhang*/ | sp in      | not used |
| /Yawang/WY22-104-P* | hs1             | hst        | 0.008    |
| ro-c13.fid          | pw90            | pw90       | 9.200    |
| ACQUISITION         | atifa           | atifa      | 10.000   |
| sw                  | 28258.6         | FLAGS      |          |
| at                  | 1.300           | il         | n        |
| np                  | 73498           | in         | n        |
| fb                  | 16000           | dp         | y        |
| bs                  | 4               | hs         | nn       |
| d1                  | 3.000           | PROCESSING | 0.50     |
| nt                  | 1e+06           | lb         | nn       |
| ct                  | 129             | tsfid      | 2        |
| fn                  | not used        |            |          |
| TRANSMITTER         | C13             |            |          |
| tn                  | 125.702         | sp         | -1326.7  |
| sfrq                | 865.4           | wp         | 28258.1  |
| tof                 | 56              | rfl        | 11034.1  |
| tpwr                | 6.000           | rtp        | 9707.0   |
| pw                  |                 | tp         | 28.9     |
| DECOUPLER           | H1              | tp         | -934.9   |
| dn                  | 0               | WC         | 250      |
| dof                 | 0               | SC         | 0        |
| dm                  | nmr             | PLOT       |          |
| decwave             | 36              | vs         | 1480     |
| dpwr                | 11101           | th         | 13       |
| dmf                 |                 | at         | cdc ph   |

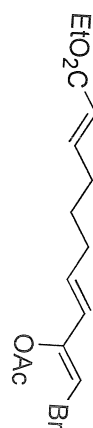

89

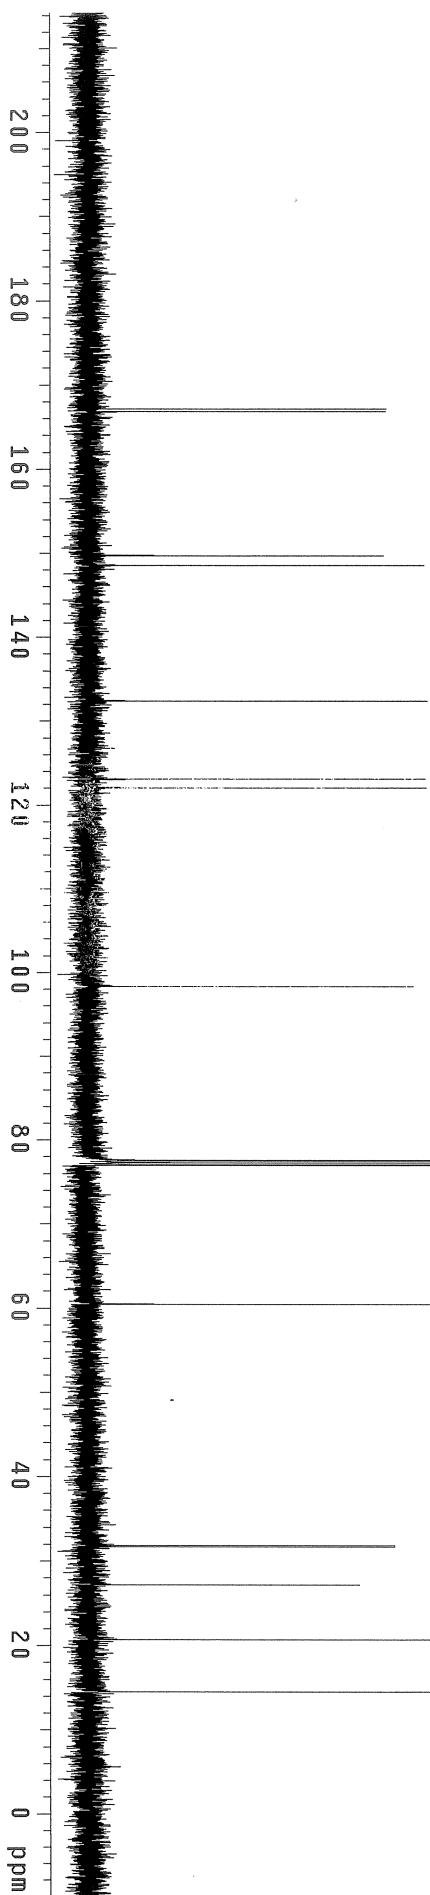

1b-II-149-1  
exp3 szpul

|             |            |            |         |
|-------------|------------|------------|---------|
| SAMPLE      |            | DEC. & VT  |         |
| date        | Sep 1 2010 | dn         | H1      |
| solvent     | cdcl3      | dof        | -1425.0 |
| file        | exp        | dm         | mm      |
| ACQUISITION |            | dm         | c       |
| sfrq        | 399.951    | dmf        | 200     |
| tn          | H1         | PROCESSING |         |
| at          | 2.502      | fb         | 0.10    |
| np          | 36008      | fn         | 65536   |
| sw          | 7196.8     | math       | f       |
| fb          | not used   |            |         |
| bs          | 2          | werf       |         |
| pw          | 8.0        | wexp       |         |
| tpwr        | 57         | wbs        |         |
| d1          | 3.000      | wnt        |         |
| tof         | -6.9       | DISPLAY    |         |
| nt          | 16         | sp         | -79.6   |
| ct          | 16         | wp         | 3659.7  |
| alock       | n          | vs         | 63      |
| gain        | not used   | sc         | 0       |
| flags       | not used   | wc         | 250     |
| il          | n          | hzm        | 14.64   |
| in          | n          | is         | 500.00  |
| dp          | y          | rtf        | 4502.4  |
| hs          | mn         | th         | 2903.6  |
|             |            | ins        | 2       |
|             |            | ai         | 3.000   |
|             |            | ph         |         |

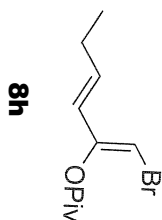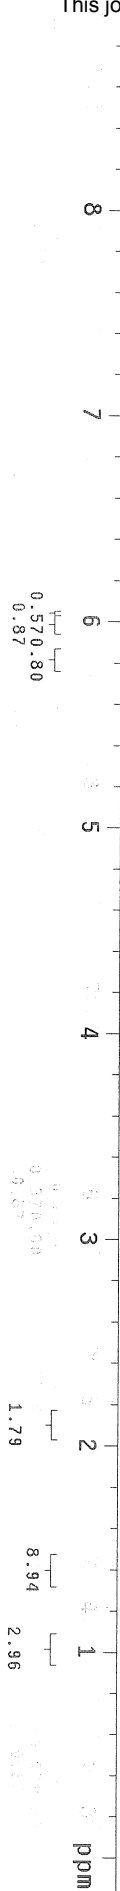

1b-II-149-C13  
exp1 CARBON

|             |             |            |          |
|-------------|-------------|------------|----------|
| SAMPLE      |             | SPECIAL    |          |
| date        | Aug 31 2010 | temp       | not used |
| solvent     | cdcl3       | gain       | 54       |
| file        | exp         | sp1n       | not used |
| ACQUISITION |             | hst        | 0.008    |
| sw          | 28258.6     | pw90       | 9.200    |
| at          | 1.300       | alpha      | 10.000   |
| np          | 73498       | FLAGS      |          |
| fb          | 16000       | i1         | n        |
| bs          | 4           | in         | n        |
| d1          | 3.000       | dp         | y        |
| nt          | 1000        | hs         | nm       |
| ct          | 320         | PROCESSING |          |
| TRANSMITTER |             | lb         | 0.50     |
| tn          | C13         | jsfid      | not used |
| sfreq       | 125.702     | fn         | not used |
| lof         | 865.4       | DISPLAY    |          |
| tpwr        | 56          | sp         | -569.5   |
| pw          | 13.500      | wp         | 25220.8  |
| DECOUPLER   |             | rfl        | 11035.8  |
| dn          | H1          | rffp       | 9707.0   |
| dof         | 0           | rfp        | 166.5    |
| dm          | my          | lp         | -908.3   |
| decwave     |             | PLOT       |          |
| dpwr        | 36          | wc         | 250      |
| dmf         | 11101       | vs         | 0        |
|             |             | th         | 2319     |
|             |             | ai         | 9        |
|             |             | cdc ph     |          |

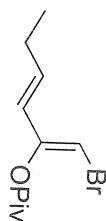

**8h**

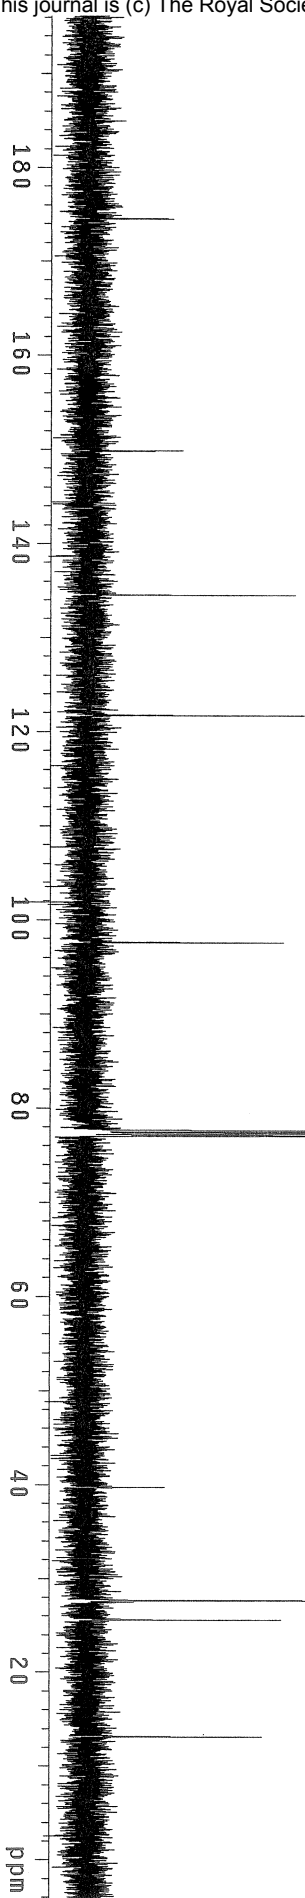

1b-I-205  
expi s2pu1

|             |             |            |        |
|-------------|-------------|------------|--------|
| SAMPLE      |             | DEC. & VT  |        |
| date        | Apr 21 2010 | dn         | F19    |
| solvent     | CDCl3       | dof        | 0      |
| f1le        | exp         | dm         | nmn    |
| ACQUISITION |             | dmm        | C      |
| sfrq        | 499.859     | dmf        | 200    |
| tn          | H1          | PROCESSING |        |
| at          | 2.668       | fn         | 32768  |
| mp          | 32000       | math       | i      |
| sw          | 5997.0      |            |        |
| td          | 3000        | wer        |        |
| bs          | 2           | wexp       |        |
| pw          | 7.0         | wbs        |        |
| tpwr        | 7.0         | wnt        |        |
| dl          | 53          | DISPLAY    |        |
| tof         | 2.000       | sp         | -62.5  |
| nt          | 0           | wp         | 4770.4 |
| ct          | 8           | vs         | 23     |
| atlock      | 8           | sc         | 0      |
| gain        | not used    | yc         | 250    |
| FLAGS       | not used    | hzm        | 19.08  |
| i1          | n           | is         | 130.02 |
| in          | n           | rfl        | 4132.9 |
| dp          | y           | thp        | 3629.0 |
| hs          | nn          | thp        | 9.000  |
|             | ai          | ph         |        |

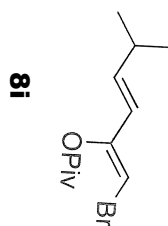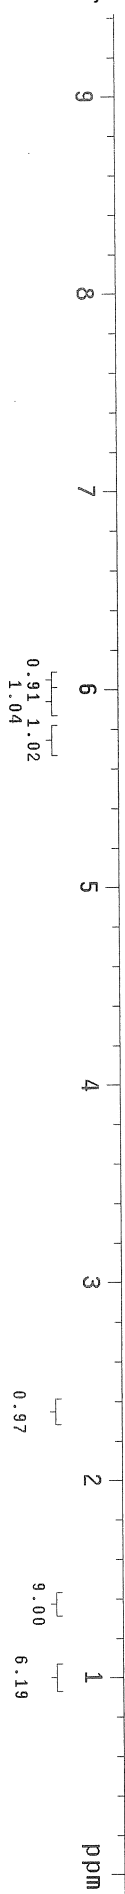

1b-I-205-C13  
exp1 CARBON

|             |         |            |          |
|-------------|---------|------------|----------|
| date        | SAMPLE  | temp       | SPECIAL  |
| Apr 21 2010 |         | 22.0       |          |
| solvent     | cdc13   | gain       | 54       |
| file        | exp     | spin       | not used |
| ACQUISITION | exp     | hst        | 0.008    |
| sw          | 28258.6 | pw90       | 9.200    |
| at          | 1.300   | alpha      | 10.000   |
| np          | 73498   | FLAGS      |          |
| fb          | 16000   | i1         | n        |
| bs          | 4       | in         | n        |
| d1          | 3.000   | dp         | y        |
| nt          | 1000    | hs         | nn       |
| ct          | 208     | PROCESSING | 0.50     |
| TRANSMITTER | 1b      | isfid      | 2        |
| tn          | C13     | fn         | not used |
| sfrq        | 125.702 | DISPLAY    |          |
| tof         | 865.4   | SP         | 853.7    |
| tpwr        | 6.000   | wp         | 23636.2  |
| DECOUPLER   | H1      | rft1       | 11032.1  |
| dn          | 0       | rtp        | 83.5     |
| dof         | 0       | lp         | -937.9   |
| dm          | nmv     | PLOT       |          |
| decwave     |         | WC         | 250      |
| dpwr        | 36      | SC         | 0        |
| dmt         | 11101   | VS         | 1427     |
| th          |         | ai         | cdc ph   |

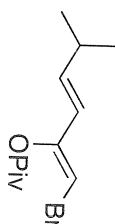

**81**

180 160 140 120 100 80 60 40 20 ppm

wyz-2-171-product  
exp1 szpul

SAMPLE date Aug 26 2010  
solvent cdcl3  
file exp  
ACQUISITION  
sfrq 399.951  
tn H1  
at 2.502  
np 36.008  
sw 7196.8  
fb not used  
bs 2  
pw 8.0  
tprf 8.0  
d1 57  
3.000  
-6.9  
16  
16  
16  
nt  
ct  
atlock  
gain  
FLAGS not used  
il n  
in n  
dp n  
hs n  
ai ins  
ph

DEC. & VT H1  
-1425.0  
nm  
c  
200  
PROCESSING  
0.10  
f  
65536  
f

DISPLAY  
-76.4  
3612.7  
45  
0  
250  
14.45  
291.74  
4502.5  
2905.6  
2  
3.000

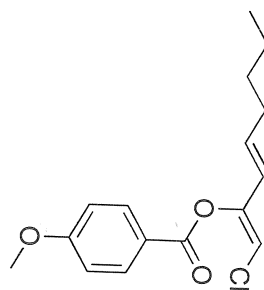

**8j**

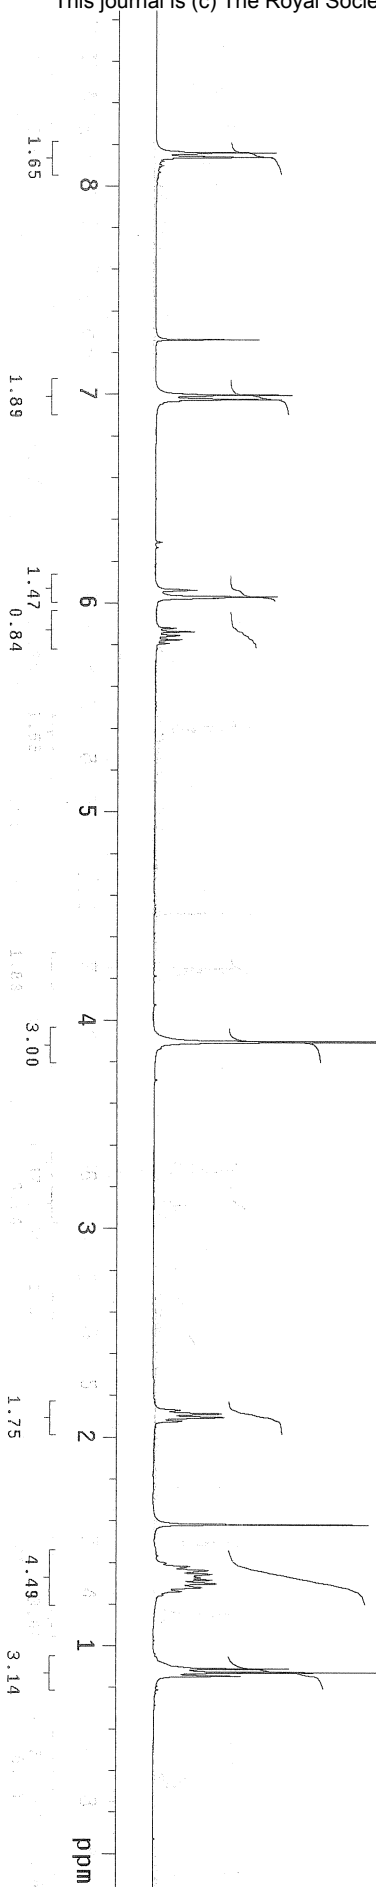

# STANDARD CARBON PARAMETERS

exp1 CARBON

| SAMPLE              |                | SPECIAL    |          |
|---------------------|----------------|------------|----------|
| date                | Jul 28 2010    | temp       | not used |
| solvent             | cdcl3          | gain       | 54       |
| file                | /nmr500/Zhangw | spin       | not used |
| /Yawang/WY22-171-2~ |                | hst        | 0.008    |
| -pro-cl3.fid        |                | pw90       | 9.200    |
| ACQUISITION         |                | alifa      | 10.000   |
| sw                  | 28258.6        | flags      |          |
| at                  | 1.300          | i1         | n        |
| np                  | 73498          | in         | n        |
| fb                  | 16000          | dp         | y        |
| bs                  | 4              | hs         | n        |
| d1                  | 3.000          | PROCESSING | 0.50     |
| nt                  | 1e+06          | lp         | 2        |
| ct                  | 213            | lsfid      | not used |
| fn                  | not used       |            |          |
| tn                  | C13            | DISPLAY    |          |
| sfrq                | 125.702        | sp         | -199.2   |
| lof                 | 865.4          | wp         | 24019.1  |
| tpwr                | 56             | rf1        | 11031.6  |
| pw                  | 6.000          | rtp        | 9707.0   |
| DECOUPLER           | H1             | tp         | 119.7    |
| dn                  | 0              | tp         | -796.7   |
| dof                 | 0              | WC         | 250      |
| dm                  | ny             | SC         | 0        |
| decwave             | 36             | VS         | 1328     |
| dpwr                | 11101          | th         | 17       |
| dmf                 |                | at         | cdc ph   |

8j

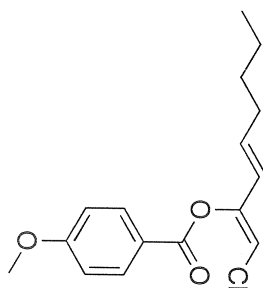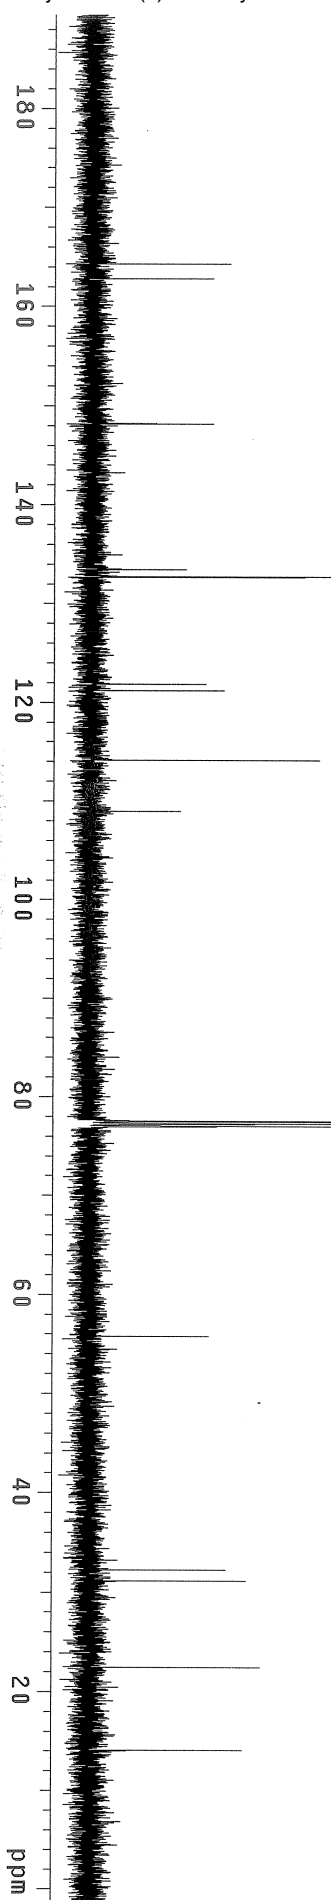



WY2-DA-1  
exp3, s2pu1

|             |          |             |           |    |
|-------------|----------|-------------|-----------|----|
| SAMPLE      | date     | Aug 23 2010 | DEC. & VT | H1 |
| solvent     | cdc13    |             | -1425.0   |    |
| file        | exp      |             | nm        |    |
| ACQUISITION |          |             |           |    |
| sfrq        | 399.951  | dm          | 200       |    |
| tn          | H1       | dmf         | 22.0      |    |
| at          | 2.502    | temp        |           |    |
| np          | 36008    | 1b          | 0.10      |    |
| sv          | 7196.8   | fn          | 65536     |    |
| fb          | not used | math        |           |    |
| bs          | 2        |             |           |    |
| pw          | 8.0      | werr        |           |    |
| tpwr        | 57       | wexp        |           |    |
| d1          | 3.000    | wbs         |           |    |
| tof         | -6.9     | wnt         |           |    |
| nt          | 16       |             |           |    |
| ct          | 16       | sp          | 107.8     |    |
| alock       | 16       | wp          | 3624.6    |    |
| gain        | n        | vs          | 29        |    |
| FLAGS       | not used | sc          | 0         |    |
| il          | n        | hzm         | 250       |    |
| in          | n        | is          | 14.50     |    |
| dp          | y        | rfl         | 500.00    |    |
| hs          | nn       | rfl         | 4502.8    |    |
|             |          | th          | 2903.6    |    |
|             |          | ins         | 2         |    |
|             |          | ai          | 3.000     |    |
|             |          | ph          |           |    |

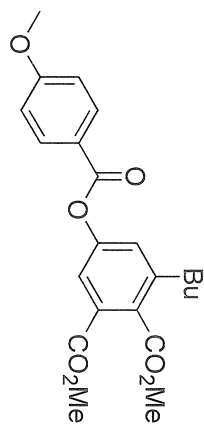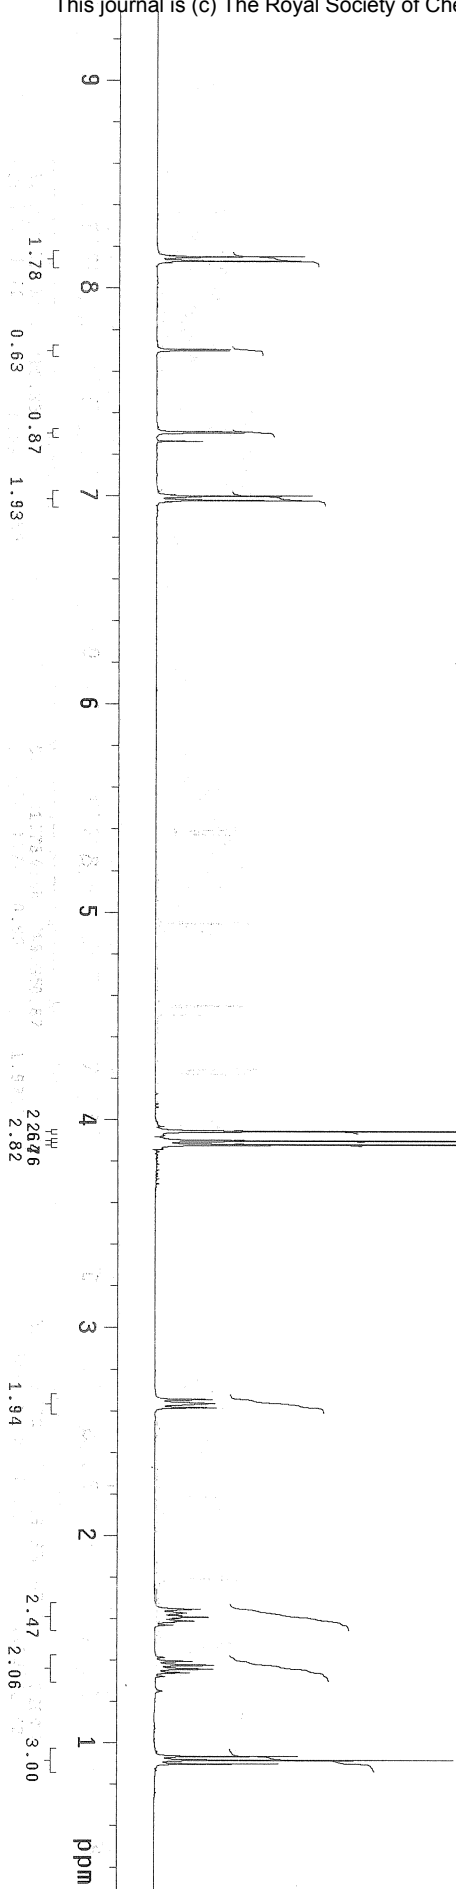

wyz-DA-1  
exp1 CARBON

|             |             |             |            |          |
|-------------|-------------|-------------|------------|----------|
| date        | SAMPLE      | Aug 23 2010 | temp       | not used |
| solvent     | cdcl3       |             | gain       | 54       |
| file        | exp         |             | spin       | not used |
| sw          | ACQUISITION | 28258.6     | hst        | 0.008    |
| at          |             | 1.300       | pw90       | 9.200    |
| np          |             | 73498       | alpha      | 10.000   |
| fb          |             | 16000       | flags      |          |
| bs          |             | 4           |            |          |
| di          |             | 3.000       | in         | n        |
| nt          |             | 1000        | dp         | y        |
| ct          |             | 108         | hs         | nn       |
| TRANSMITTER |             |             | PROCESSING | 0.50     |
| tn          | C13         | 1b          | isfid      | 2        |
| sfrq        | 125.702     | fn          | not used   |          |
| tof         | 865.4       | DISPLAY     |            |          |
| tpwr        | 13.500      | sp          | -600.9     |          |
| pw          |             | wp          | 25386.0    |          |
| DECOUPLER   | H1          | rfl         | 11034.4    |          |
| dn          | 0           | rff         | 9707.0     |          |
| dof         | 0           | rp          | -108.7     |          |
| dm          | ny          | lp          | -930.7     |          |
| decwave     |             | PLOT        |            |          |
| dpwr        | 36          | wc          | 250        |          |
| dmf         | 11101       | sc          | 0          |          |
|             |             | vs          | 969        |          |
|             |             | th          | 14         |          |
|             |             | ai          | cdc        | ph       |

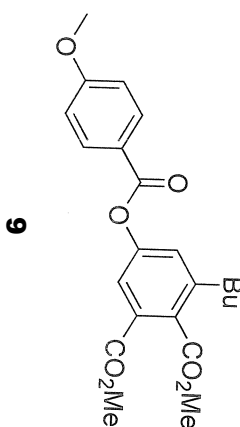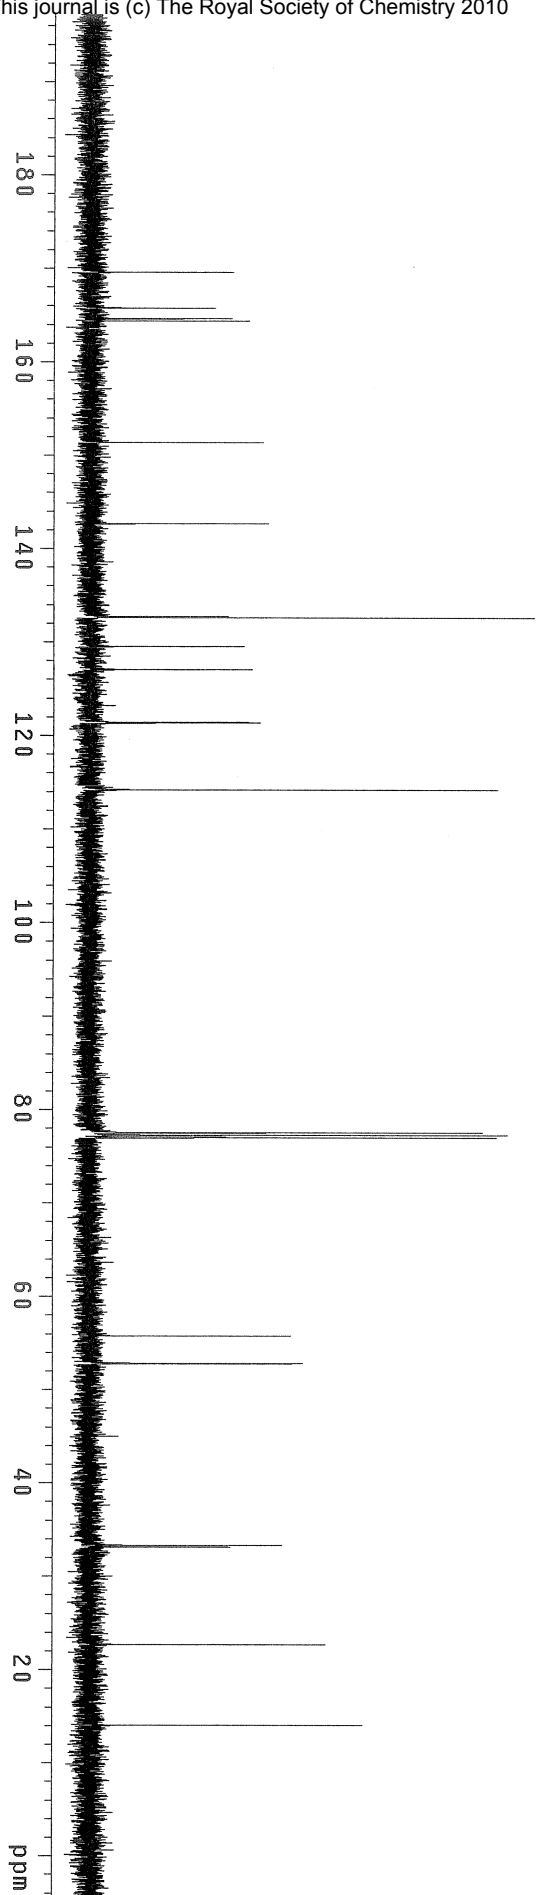

1b-II-142-C-purification  
exp3 s2pu1

|             |             |            |         |
|-------------|-------------|------------|---------|
| SAMPLE      |             | DEC. & VT  |         |
| date        | Aug 23 2010 | dn         | H1      |
| solvent     | cdcl3       | dof        | -1425.0 |
| file        | exp         | dm         | nm      |
| ACQUISITION |             | dm         | c       |
| sfrq        | 399.951     | dmf        | 200     |
| tn          | H1          | PROCESSING |         |
| at          | 2.502       | lb         | 0.10    |
| np          | 36008       | fn         | 65536   |
| sw          | 7196.8      | math       | f       |
| fb          | not used    |            |         |
| bs          | 2           | weir       |         |
| pw          | 8.0         | wexp       |         |
| tpwr        | 57          | wbs        |         |
| dl          | 3.000       | wnt        |         |
| tof         | -6.9        | sp         | DISPLAY |
| nt          | 32          | wp         | -179.3  |
| ct          | 32          | vs         | 4105.5  |
| atlock      | n           | sc         | 59      |
| gain        | not used    | wc         | 0       |
| flags       | not used    | hzm        | 250     |
| il          | n           | is         | 16.42   |
| in          | n           | rfl        | 500.00  |
| dp          | y           | th         | 4502.4  |
| hs          | nm          | ins        | 2903.6  |
|             |             | ai         | 3.000   |
|             |             | ph         |         |

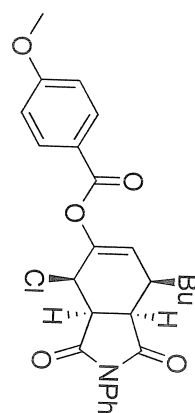

10

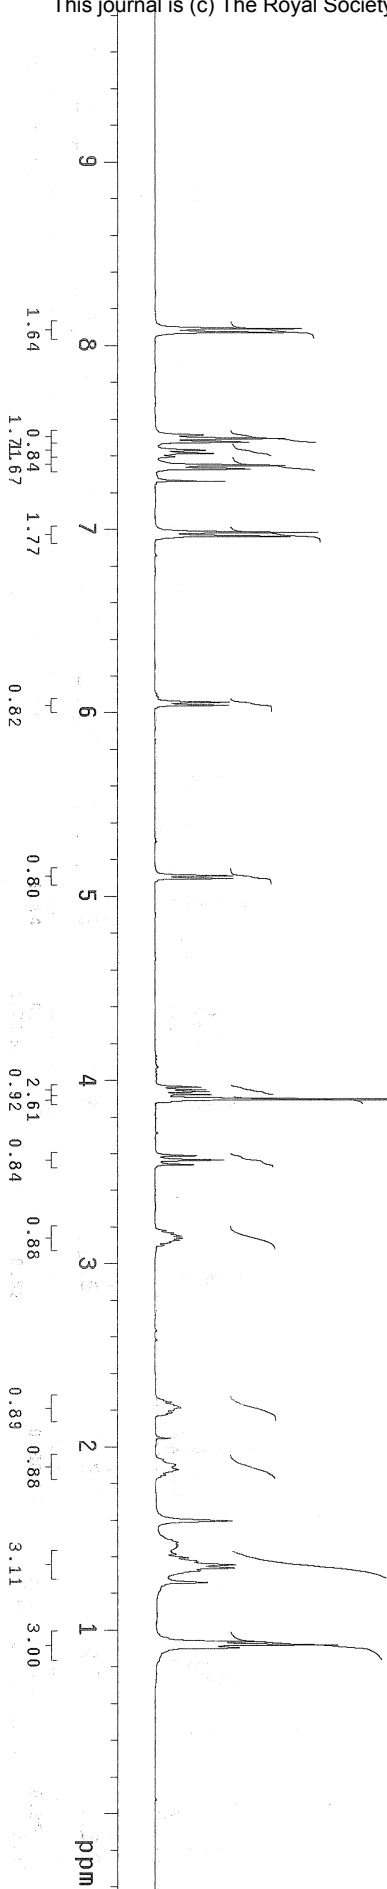

1b-II-142-C-13  
exp2 CARBON

|             |             |            |          |
|-------------|-------------|------------|----------|
| SAMPLE      |             | SPECIAL    |          |
| date        | Aug 23 2010 | temp       | not used |
| solvent     | cdc13       | gain       | 54       |
| file        | cdc13       | spin       | not used |
| sw          | ACQUISITION | hst        | 0.008    |
| at          | 28258.6     | pw90       | 9.200    |
| np          | 1.300       | alpha      | 10.000   |
| fb          | 73498       | FLAGS      |          |
| bs          | 16000       | il         | n        |
| dl          | 5           | in         | n        |
| nt          | 3.000       | dp         | y        |
| ct          | 10000       | hs         | nn       |
| TRANSMITTER |             | PROCESSING |          |
| tn          | C13         | lb         | 0.50     |
| sfreq       | 125.702     | isfid      | 2        |
| tof         | 865.4       | fn         | not used |
| tpwr        | 56          | DISPLAY    |          |
| pw          | 13.500      | sp         | -467.8   |
| DECOUPLER   |             | wp         | 25086.9  |
| dn          | H1          | rf1        | 11033.3  |
| dof         | 0           | rffp       | 9707.0   |
| dm          | ny          | lp         | -118.6   |
| decwave     |             | PLOT       |          |
| dpwr        | 36          | wc         | 250      |
| dmf         | 11101       | sc         | 0        |
|             |             | vs         | 790      |
|             |             | th         | 5        |
|             |             | ai         | cdc ph   |

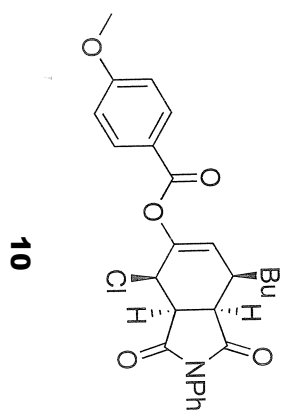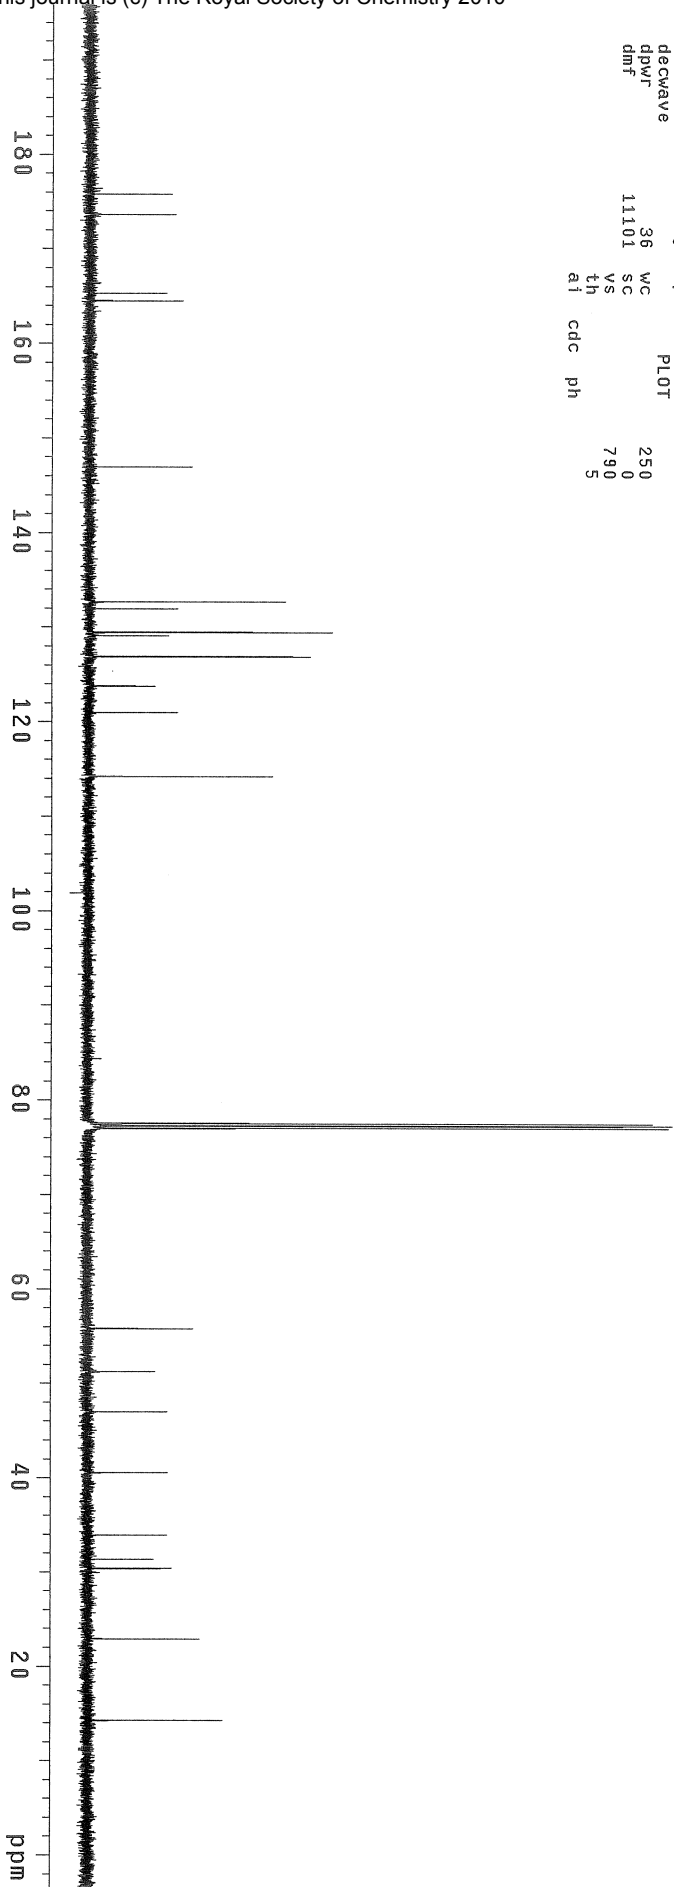

1b-II-142-C

File: xp

Pulse Sequence: relayh

Solvent: CDCl<sub>3</sub>

Ambient temperature

Operator: bjaoliu

INOVA-500 "nmr-500"

Relax. delay 3.000 sec  
COSY 90-90  
Acq. time 0.224 sec  
Width 4566.2 Hz  
2D Width 4566.2 Hz  
3 repetitions  
256 increments  
OBSERVE H1 499.8560507 MHz  
DATA PROCESSING  
Sine bell 0.112 sec  
F1 DATA PROCESSING  
Line broadening 0.3 Hz  
F1 size 1024 x 1024  
Total time 42 min, 12 sec

10

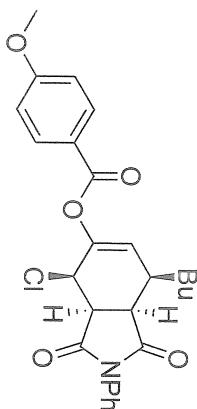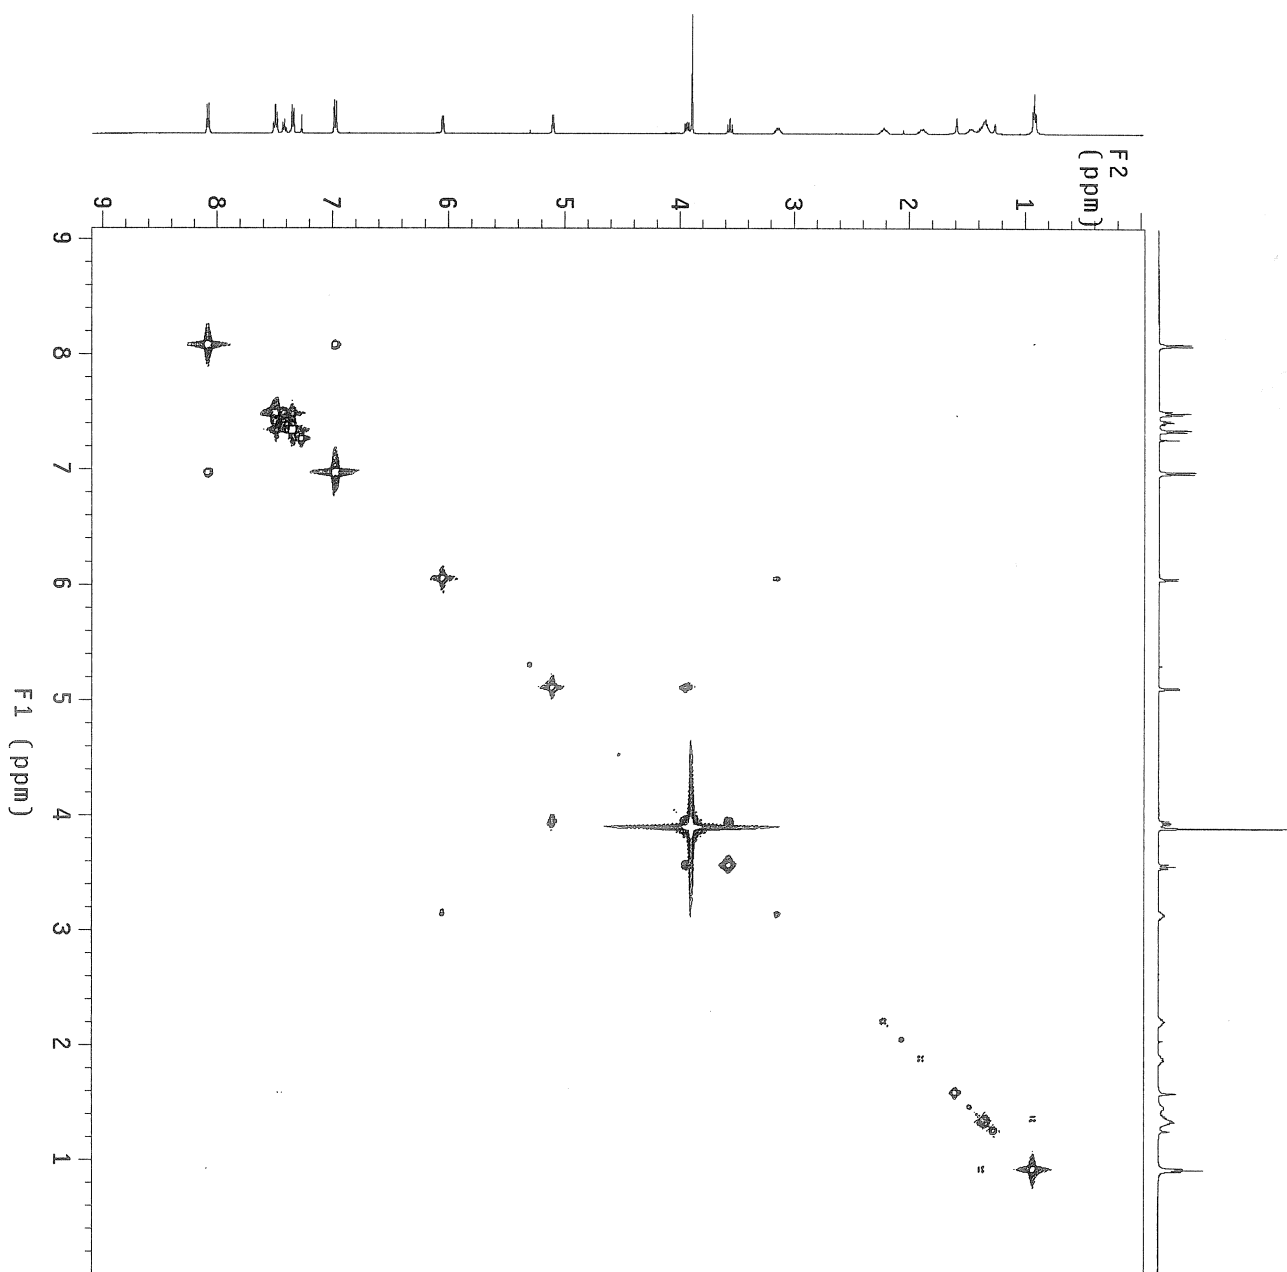

10

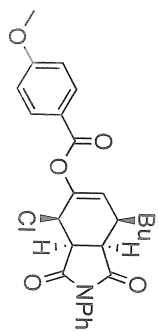

H1x ppm

H 1 y  
p p m

9  
8  
7  
6  
5  
4  
3  
2  
1  
0  
-1

9

8

7

6

5

4

3

2

1

0

1b-II-152-2  
exp3 s2pu1

|             |          |            |         |
|-------------|----------|------------|---------|
| SAMPLE      |          | DEC. & VT  |         |
| date        | 1 2010   | dn         | H1      |
| solvent     | cdcl3    | do         | -1425.0 |
| file        | exp      | dm         | nm      |
| ACQUISITION |          | dm         | c       |
| sfrq        | 399.951  | dmf        | 200     |
| tn          | H1       | PROCESSING | 0.10    |
| at          | 2.502    | lb         | 65536   |
| np          | 36008    | fn         | f       |
| sw          | 7196.8   | math       |         |
| fb          | not used |            |         |
| bs          | 2        | werf       |         |
| pw          | 8.0      | wexp       |         |
| pw          | 8.0      | wbs        |         |
| tpwr        | 57       | wnt        |         |
| dl          | 3.000    | DISPLAY    |         |
| tof         | -6.9     | sp         | -484.6  |
| nt          | 16       | wp         | 3806.4  |
| ct          | 16       | vs         | 49      |
| alock       | n        | sc         | 0       |
| gain        | not used | wc         | 250     |
| FLAGS       |          | h2mm       | 15.23   |
| il          | n        | is         | 500.00  |
| in          | n        | ftl        | 4502.6  |
| dp          | y        | rfp        | 2903.6  |
| hs          | nm       | th         | 2       |
|             |          | ins        | 3.000   |
|             |          | ai         | ph      |

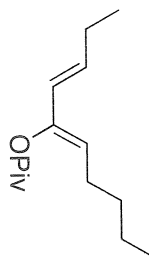

11

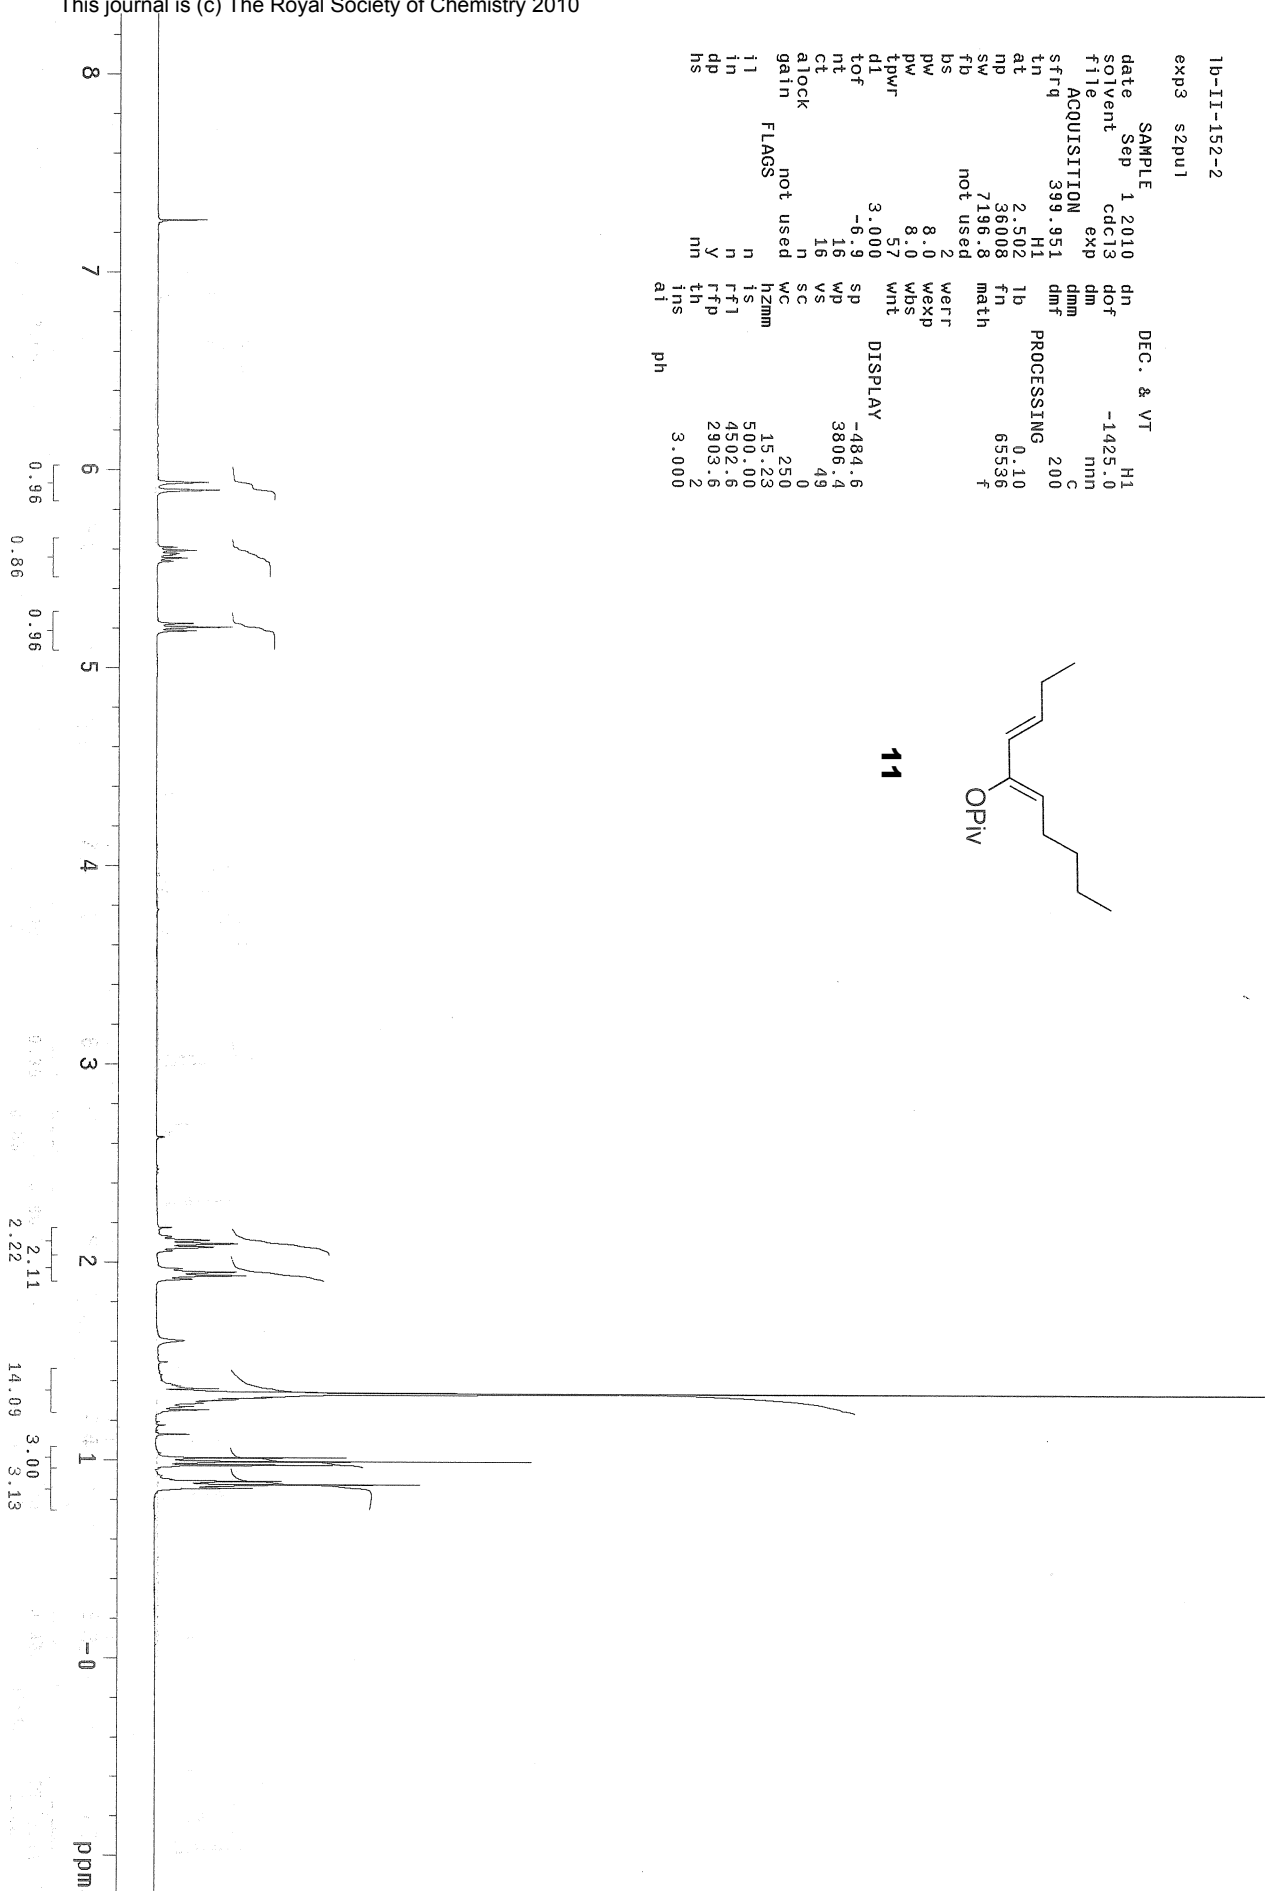

1b-II-152-2-C13  
expi1 CARBON

| SAMPLE      |                 | SPECIAL    |          |
|-------------|-----------------|------------|----------|
| date        | Sep 1 2010      | temp       | not used |
| solvent     | cdc13           | gain       | 54       |
| file        | exp             | spin       | not used |
| ACQUISITION |                 | hst        | 0.008    |
| sw          | 28258.6         | pw90       | 9.200    |
| at          | 1.300           | atfa       | 10.000   |
| nb          | 73398           | FLAGS      |          |
| fb          | 16000           | i1         | n        |
| bs          | 4               | in         | n        |
| d1          | 3.000           | dp         | y        |
| nt          | 1000            | hs         | nn       |
| ct          | 172             | PROCESSING |          |
| tn          | TRANSMITTER C13 | 1b         | 0.50     |
| stfq        | 125.702         | 1sfid      | 2        |
| lof         | 865.4           | fn         | not used |
| tpwr        | 56              | DISPLAY    |          |
| pw          | 13.500          | sp         | -238.9   |
| DECOUPLER   |                 | wp         | 25088.9  |
| dn          | H1              | rfl        | 11035.5  |
| dof         | 0               | rfp        | 9707.0   |
| din         | 0               | tp         | -133.3   |
| decwave     | mnv             | tp         | -372.1   |
| dpwr        | 36              | PLOT       |          |
| dmf         | 11101           | wc         | 250      |
|             |                 | sc         | 0        |
|             |                 | vs         | 1141     |
|             |                 | th         | 11       |
|             |                 | ai         | cdc ph   |

11

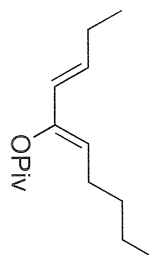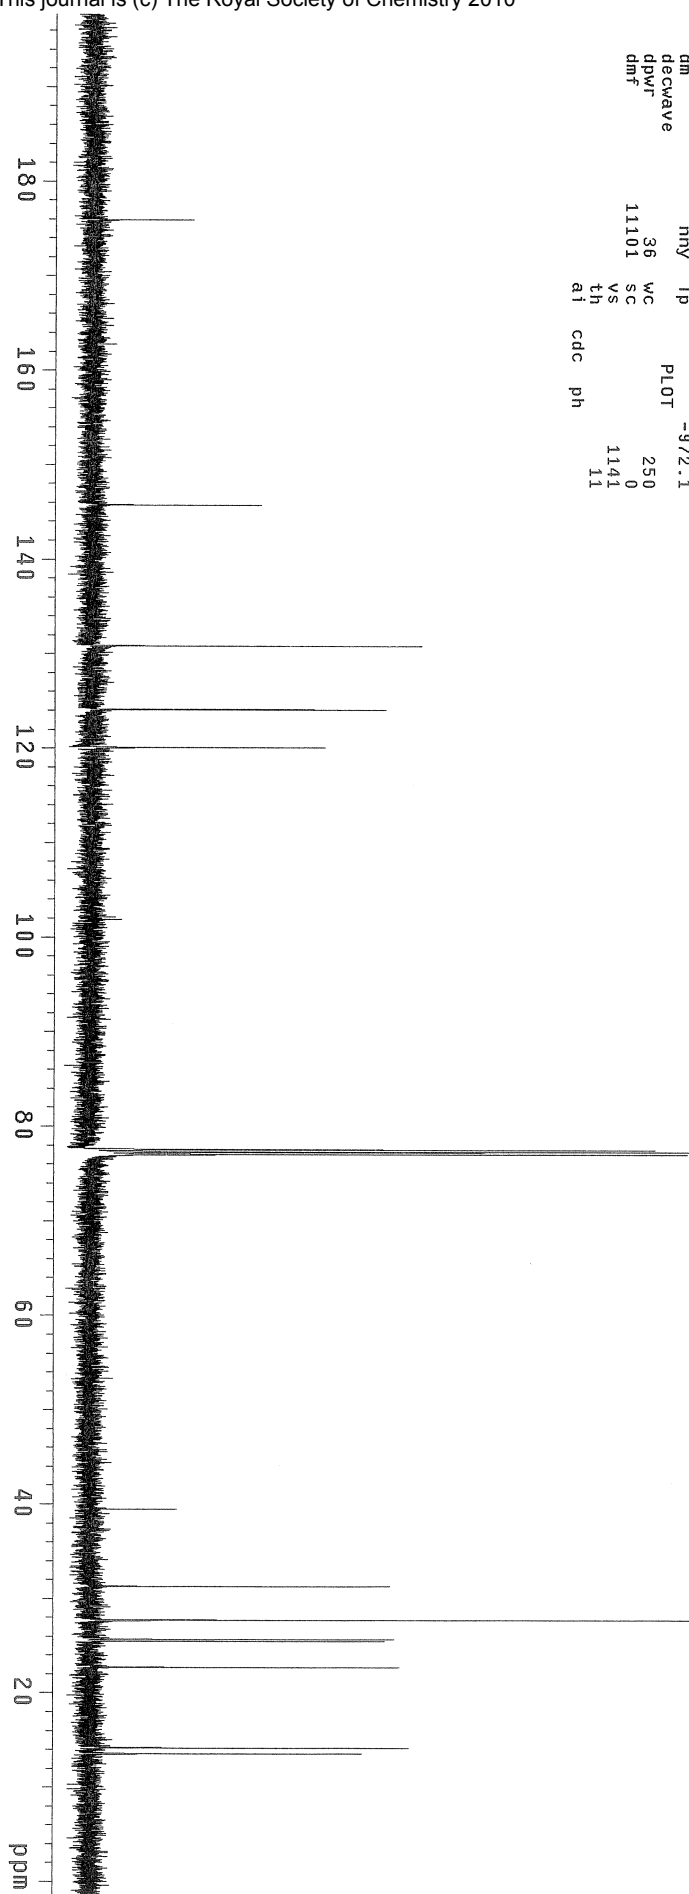



1b-II-153

exp3 s2pu1

|             |             |            |         |
|-------------|-------------|------------|---------|
| SAMPLE      |             | DEC. & VT  |         |
| date        | Aug 31 2010 | dn         | H1      |
| solvent     | cdcl3       | do         | -1425.0 |
| file        | exp         | dm         | nm      |
| ACQUISITION |             | dm         | c       |
| sfrq        | 399.951     | dmf        | 200     |
| tn          | H1          | PROCESSING |         |
| at          | 2.502       | lb         | 0.10    |
| np          | 36008       | fn         | 65536   |
| sw          | 7196.8      | math       | f       |
| fb          | not used    | werf       |         |
| bs          | 2           | wexp       |         |
| pw          | 8.0         | wbs        |         |
| tpwr        | 57          | wnt        |         |
| di          | 3.000       | DISPLAY    |         |
| tof         | -6.9        | sp         | -66.8   |
| nt          | 8           | wp         | 3446.9  |
| ct          | 8           | vs         | 47      |
| alock       | n           | sc         | 0       |
| gain        | not used    | wc         | 250     |
| FLAGS       |             | h2mm       | 13.73   |
| il          | n           | is         | 500.00  |
| in          | n           | rfl        | 1598.9  |
| dp          | y           | rffp       | 0       |
| hs          | mn          | th         | 16      |
|             | ins         | ph         | 3.000   |

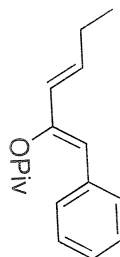

12

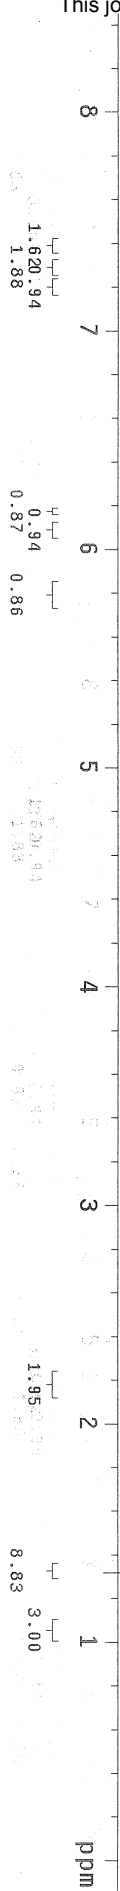

1b-II-153-C13  
exp1 CARBON

|             |             |            |          |
|-------------|-------------|------------|----------|
| SAMPLE      |             | SPECIAL    |          |
| date        | Aug 31 2010 | temp       | not used |
| solvent     | cdcl3       | gain       | 54       |
| file        | exp         | spin       | not used |
| ACQUISITION |             | hst        | 0.008    |
| sw          | 28258.6     | pw90       | 9.200    |
| at          | 1.300       | alfa       | 10.000   |
| np          | 73498       | FLAGS      |          |
| fb          | 16000       | i1         | n        |
| bs          | 5           | in         | n        |
| d1          | 3.000       | dp         | y        |
| nt          | 10000       | hs         | nm       |
| ct          | 90          | PROCESSING |          |
| TRANSMITTER |             | lb         | 0.50     |
| tn          | C13         | 1sfid      | 2        |
| sfreq       | 125.702     | fn         | not used |
| tof         | 865.4       | DISPLAY    |          |
| tpwr        | 56          | sp         | -571.7   |
| pw          | 13.500      | wp         | 24725.8  |
| DECOUPLER   |             | rfl        | 11038.0  |
| dn          | H1          | rfd        | 9707.0   |
| dof         | 0           | rp         | 145.6    |
| dm          | nny         | lp         | -923.1   |
| decwave     |             | PLOT       |          |
| dpr         | 36          | wc         | 250      |
| dmf         | 11101       | sc         | 0        |
|             |             | th         | 791      |
|             |             | ai         | 7        |
|             |             | cdc        | ph       |

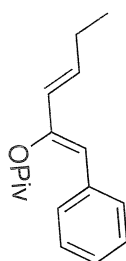

12

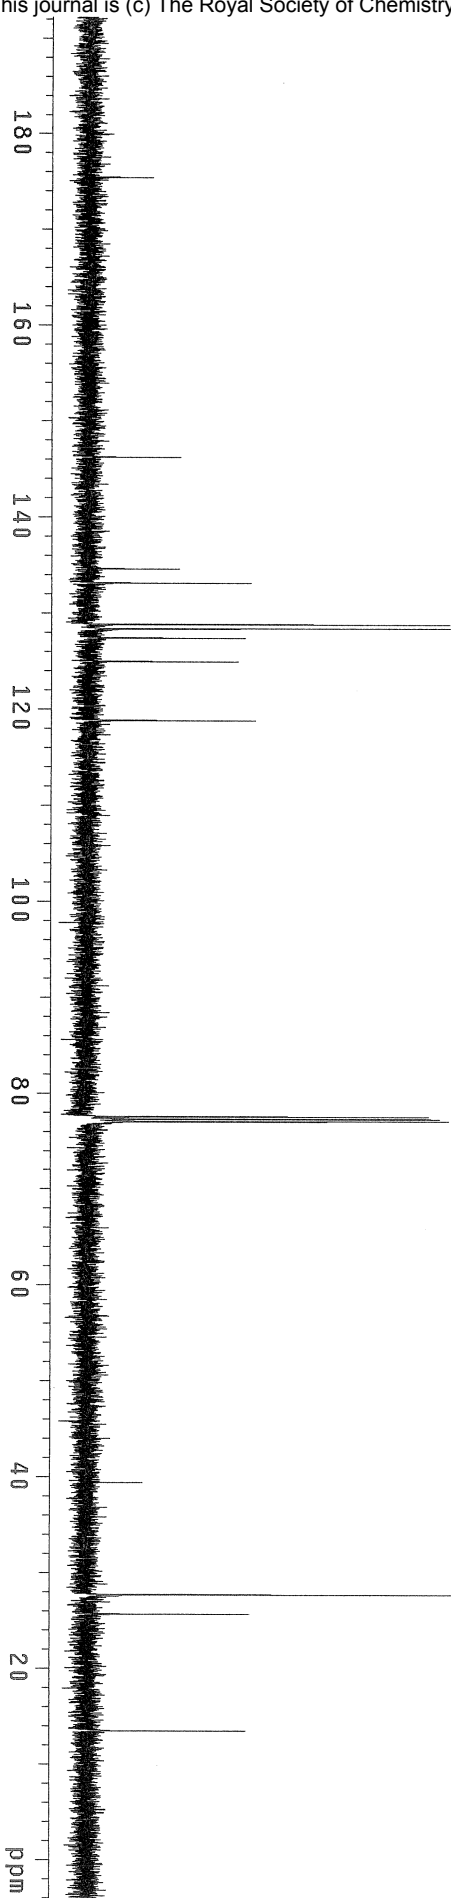

1b-II-154-2  
exp3 szpu1

|             |          |            |         |
|-------------|----------|------------|---------|
| SAMPLE      |          | DEC. & VT  |         |
| date        | 1 2010   | dn         | H1      |
| solvent     | cdcl3    | do         | -1425.0 |
| file        | exp      | dm         | nm      |
| ACQUISITION |          | dm         | c       |
| sfrq        | 399.951  | dmf        | 200     |
| tn          | H1       | PROCESSING |         |
| at          | 2.502    | lb         | 0.10    |
| np          | 36008    | fn         | 65536   |
| sw          | 7196.8   | math       | f       |
| fb          | not used | werf       |         |
| bs          | 2        | wexp       |         |
| pw          | 8.0      | wbs        |         |
| tpwr        | 57       | wrt        |         |
| di          | 3.000    | DISPLAY    |         |
| tof         | -6.9     | sp         | -214.6  |
| nt          | 16       | wp         | 3782.9  |
| ct          | 14       | vs         | 49      |
| alock       | n        | sc         | 0       |
| gain        | not used | hzm        | 250     |
| il          | n        | hzm        | 15.13   |
| in          | n        | is         | 500.00  |
| dp          | y        | rfl        | 4502.6  |
| hs          | mn       | th         | 2903.6  |
|             |          | ins        | 2       |
|             |          | ai         | 3.000   |
|             |          | ph         |         |

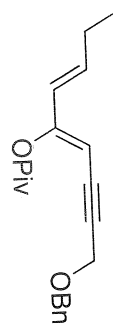

**13**

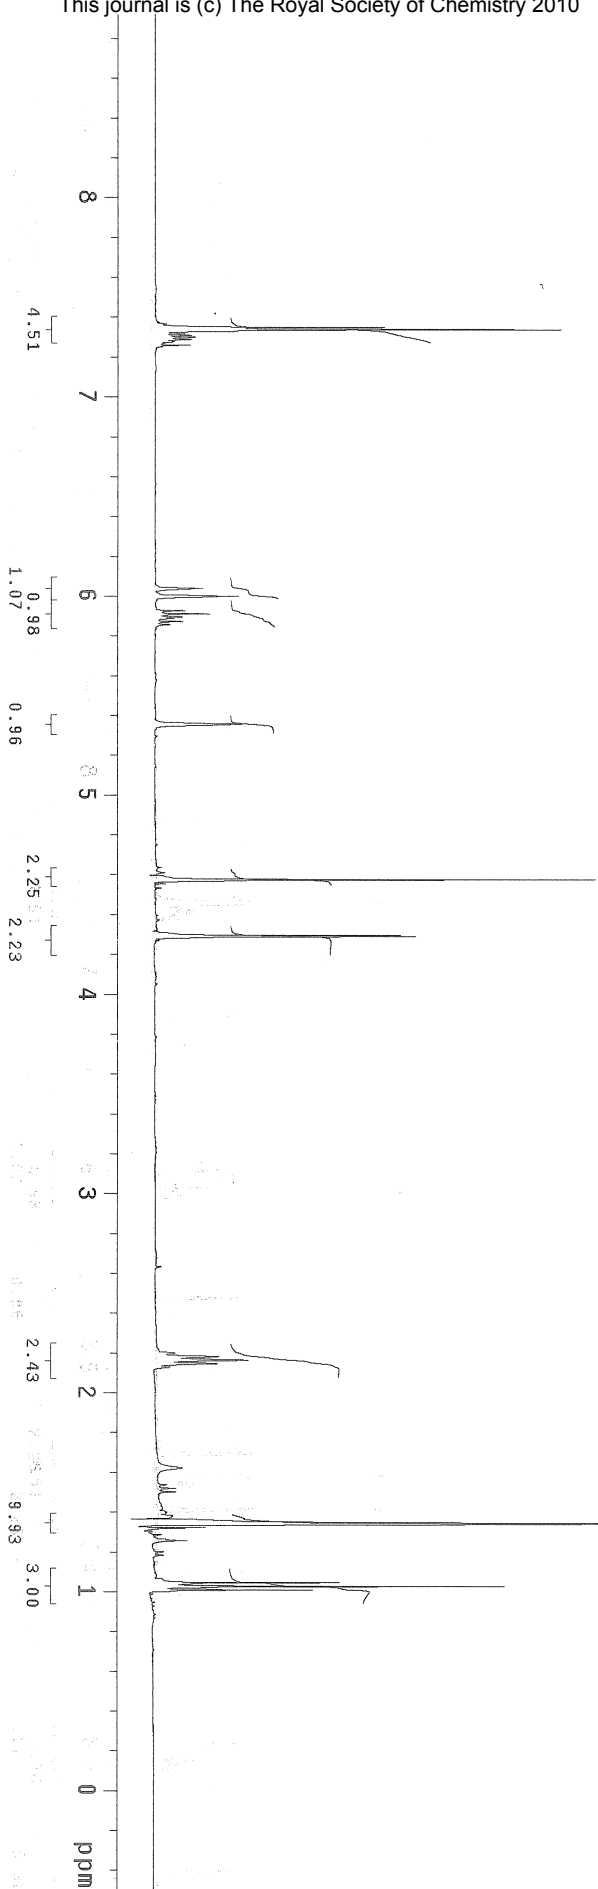

1b-II-154-1-C13  
expt1 CARBON

|                 |            |                 |          |
|-----------------|------------|-----------------|----------|
| SAMPLE          |            | SPECIAL         |          |
| date            | Sep 1 2010 | temp            | not used |
| solvent         | cdcl3      | gain            | 54       |
| file            | exp        | spin            | not used |
| ACQUISITION     |            | hst             | 0.008    |
| sw              | 28258.6    | pw90            | 9.200    |
| at              | 1.300      | alpha           | 10.000   |
| np              | 73498      | FLAGS           |          |
| fb              | 16000      | i1              | n        |
| bs              | 4          | in              | n        |
| d1              | 3.000      | dp              | y        |
| nt              | 10000      | hs              | nn       |
| ct              | 792        | PROCESSING 0.50 |          |
| TRANSMITTER C13 |            | 1b              | 1sfid    |
| tn              | 125.702    | fn              | not used |
| sfrq            | 865.4      | DISPLAY         |          |
| tpwr            | 56         | sp              | -736.9   |
| pw              | 13.500     | wp              | 25418.7  |
| DECOUPLER       |            | rfl             | 11038.4  |
| dn              | H1         | rffp            | 9707.0   |
| dof             | 0          | rfp             | -124.4   |
| dm              | nmv        | tp              | -979.5   |
| decwave         |            | PLOT            |          |
| dpwr            | 36         | wc              | 250      |
| dmf             | 11101      | sc              | 0        |
|                 |            | th              | 722      |
|                 |            | ai              | 5        |
|                 |            | cdc ph          |          |

13

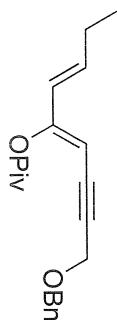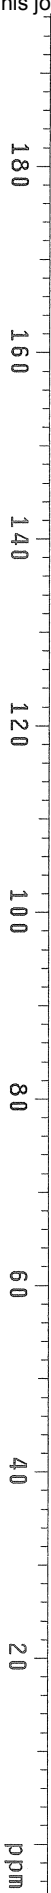

Supplement: c0cc03669b.pdf [file c0cc03669b.pdf]
